# Supplementary material
Source: PubMed Central journal article supplement (PMC8627658)
Supplement: jmm-68-1068-s001.pdf [file jmm-68-1068-s001.pdf]

Table S1. Sequencing results of samples

Sample A.

| Database | Organism                                         | Unique<br>Matches<br>Frequency | Unique<br>Matches | % Unique<br>Matches | % Total<br>Matches | Relative<br>Abundance | Above_Threshold |
|----------|--------------------------------------------------|--------------------------------|-------------------|---------------------|--------------------|-----------------------|-----------------|
| Bacteria | <i>Pseudomonas_aeruginosa_38661</i> Branch       | 36                             | 34                | 21.25               | 15.3               | 65.11                 | Y               |
| Bacteria | <i>Streptococcus_australis_ATCC_700641</i>       | 2085                           | 1883              | 2.34                | 2.39               | 12.34                 | Y               |
| Bacteria | <i>Streptococcus_sp_1_G2</i>                     | 471                            | 416               | 1.1                 | 1.22               | 5.376                 | Y               |
| Bacteria | <i>Propionibacterium_acnes_HL082PA2</i>          | 47                             | 41                | 1.98                | 2.52               | 4.487                 | Y               |
| Bacteria | <i>Klebsiella_pneumoniae_35366</i> Branch        | 28                             | 25                | 1.11                | 1.28               | 3.872                 | Y               |
| Bacteria | <i>Enterobacter_sp_MGH_33</i>                    | 208                            | 207               | 0.93                | 1.02               | 2.259                 | N               |
| Bacteria | <i>Enterococcus_faecalis_4475</i> Branch         | 16                             | 16                | 1.62                | 1.62               | 2.125                 | N               |
| Bacteria | <i>Bacteroides_fragilis_str_1242</i> Branch      | 19                             | 16                | 0.33                | 1.05               | 0.6042                | N               |
| Bacteria | <i>Serratia_liquefaciens_ATCC_27592</i>          | 319                            | 311               | 0.16                | 0.18               | 0.4145                | N               |
| Bacteria | <i>Bacteroides_plebeius_DSM_17135</i>            | 275                            | 275               | 0.14                | 0.14               | 0.3573                | N               |
| Bacteria | <i>Staphylococcus_epidermidis_VCU071</i>         | 23                             | 23                | 0.22                | 0.38               | 0.3222                | N               |
| Bacteria | <i>Bifidobacterium_breve_JCM_7019</i>            | 65                             | 65                | 0.17                | 0.17               | 0.3211                | N               |
| Bacteria | <i>Bacteroides_1055</i> Branch                   | 34                             | 34                | 0.03                | 0.04               | 0.1942                | N               |
| Bacteria | <i>Faecalibacterium_prausnitzii_27369</i> Branch | 78                             | 78                | 0.07                | 0.09               | 0.1903                | N               |
| Bacteria | <i>Streptococcus_parasanguinis_ATCC_903</i>      | 39                             | 38                | 0.1                 | 0.11               | 0.175                 | N               |
| Bacteria | <i>Anaerococcus_42657</i> Branch                 | 26                             | 25                | 0.1                 | 0.1                | 0.1713                | N               |
| Bacteria | <i>Clostridium_paraputrificum_AGR2156</i>        | 101                            | 99                | 0.08                | 0.08               | 0.1667                | N               |
| Bacteria | <i>Streptococcus_infantis_ATCC_700779</i>        | 44                             | 37                | 0.09                | 0.09               | 0.1571                | N               |
| Bacteria | <i>Clostridiales_Order_18_2486_26738</i> Branch  | 43                             | 43                | 0.06                | 0.06               | 0.119                 | N               |
| Bacteria | <i>Bacteroides_caccae_924</i> Branch             | 71                             | 71                | 0.04                | 0.04               | 0.09074               | N               |
| Bacteria | <i>Klebsiella_variicola_strain_DSM_15968</i>     | 12                             | 12                | 0.09                | 1.03               | 0.09996               | N               |
| Bacteria | <i>Acinetobacter_johnsonii_SH046</i>             | 45                             | 43                | 0.06                | 0.06               | 0.09934               | N               |
| Bacteria | <i>Alistipes_putredinis_DSM_17216</i>            | 80                             | 80                | 0.05                | 0.05               | 0.09281               | N               |
| Bacteria | <i>Klebsiella_35782</i> Branch                   | 21                             | 21                | 0.03                | 0.04               | 0.09153               | N               |
| Bacteria | <i>Bacteroides_sp_1_1_6</i>                      | 32                             | 32                | 0.06                | 0.05               | 0.09152               | N               |
| Bacteria | <i>Bacteroides_stercoris_ATCC_43183</i>          | 38                             | 38                | 0.05                | 0.06               | 0.08162               | N               |
| Bacteria | <i>Bacteroides_880</i> Branch                    | 24                             | 24                | 0.02                | 0.02               | 0.06029               | N               |
| Bacteria | <i>Bacteroides_vulgatus_dnLKV7</i>               | 23                             | 23                | 0.05                | 0.07               | 0.07613               | N               |
| Bacteria | <i>Bacteroides_824</i> Branch                    | 12                             | 12                | 0.05                | 0.07               | 0.07117               | N               |
| Bacteria | <i>Halomonas_sp_KM_1</i>                         | 73                             | 70                | 0.04                | 0.04               | 0.07041               | N               |
| Bacteria | <i>Bifidobacterium_bifidum_LMG_13195</i>         | 12                             | 12                | 0.05                | 0.04               | 0.06303               | N               |
| Bacteria | <i>Veillonella_parvula_ATCC_17745</i>            | 14                             | 14                | 0.05                | 0.05               | 0.05737               | N               |
| Bacteria | <i>Acinetobacter_lwoffii_WJ10621</i>             | 29                             | 26                | 0.04                | 0.04               | 0.05521               | N               |
| Bacteria | <i>Bacteroides_eggerthii_DSM_20697</i>           | 23                             | 23                | 0.03                | 0.04               | 0.04821               | N               |
| Bacteria | <i>Rothia_dentocariosa_20586</i> Branch          | 18                             | 18                | 0.02                | 0.02               | 0.04457               | N               |
| Bacteria | <i>Corynebacterium_striatum_ATCC_6940</i>        | 48                             | 45                | 0.03                | 0.03               | 0.04511               | N               |

Sample A cont.

|       |                                    |     |     |       |       |        |   |
|-------|------------------------------------|-----|-----|-------|-------|--------|---|
| Virus | Pseudomonas_phage_Pf1              | 421 | 356 | 13.86 | 13.86 | 75     | Y |
| Virus | Propionibacterium_phage_PHL113M01  | 107 | 79  | 2.25  | 2.95  | 18.57  | Y |
| Virus | Rosellinia_necatrix_partitivirus_2 | 122 | 10  | 0.58  | 0.58  | 5.926  | N |
| Virus | Enterococcus_phage_phiFL4A         | 31  | 31  | 0.16  | 0.16  | 0.4951 | N |

Respiratory Virus      no calls detected above threshold

Fungi                      no calls detected above threshold

|         |                                |      |     |      |      |       |   |
|---------|--------------------------------|------|-----|------|------|-------|---|
| Protist | Sarcocystis_neurona_strain_SN1 | 2279 | 268 | 0.55 | 0.23 | 74.58 | Y |
| Protist | Plasmodium_gaboni_strain_Pgk   | 980  | 48  | 0.09 | 0.09 | 19.62 | Y |
| Protist | Toxoplasma_gondii_GT1          | 156  | 17  | 0.07 | 0.02 | 5.798 | Y |

|                       |                                                |     |     |       |       |  |   |
|-----------------------|------------------------------------------------|-----|-----|-------|-------|--|---|
| Antibiotic Resistance | MDR-Efflux-pump_mexG                           | 66  | 50  | 38.46 | 38.46 |  | N |
| Antibiotic Resistance | MDR-Efflux-pump_mexQ                           | 376 | 301 | 31.58 | 31.58 |  | N |
| Antibiotic Resistance | MDR-Efflux-pump_opmE                           | 114 | 109 | 28.53 | 28.53 |  | N |
| Antibiotic Resistance | Repressor-of-efflux-complex_nfxB               | 68  | 45  | 25.28 | 25.28 |  | N |
| Antibiotic Resistance | Sensor-protein_soxR                            | 35  | 31  | 25    | 25    |  | N |
| Antibiotic Resistance | MDR-Efflux-pump_opmH                           | 126 | 101 | 24.57 | 24.57 |  | N |
| Antibiotic Resistance | Macrolide_mel                                  | 65  | 65  | 18.79 | 24.43 |  | N |
| Antibiotic Resistance | MDR-Efflux-pump_mexB                           | 256 | 245 | 24.04 | 24.04 |  | N |
| Antibiotic Resistance | Outer-membrane-factor_oprM                     | 150 | 99  | 23.86 | 23.86 |  | N |
| Antibiotic Resistance | Phenicol_catB7                                 | 45  | 45  | 23.44 | 23.44 |  | N |
| Antibiotic Resistance | Beta-lactam-resistance_bla_244_1197_740 Branch | 60  | 60  | 23.08 | 23.08 |  | N |
| Antibiotic Resistance | Repressor-of-mexJK_mexL                        | 56  | 44  | 22.68 | 22.68 |  | N |
| Antibiotic Resistance | MDR-Efflux-pump_mexD                           | 284 | 232 | 21.95 | 21.95 |  | N |
| Antibiotic Resistance | MDR-Efflux-pump_mexM                           | 72  | 66  | 20.62 | 20.62 |  | N |

Sample A cont.

|                       |                                       |     |     |       |       |   |
|-----------------------|---------------------------------------|-----|-----|-------|-------|---|
| Antibiotic Resistance | MDR-Efflux-pump_mexP                  | 57  | 57  | 17.81 | 17.81 | N |
| Antibiotic Resistance | Efflux-pump_triB                      | 49  | 49  | 17.63 | 17.63 | N |
| Antibiotic Resistance | Beta-lactam-resistance_blaOXA_50      | 70  | 70  | 17.24 | 17.24 | N |
| Antibiotic Resistance | MDR-Efflux-pump_mexC                  | 63  | 49  | 16.44 | 16.44 | N |
| Antibiotic Resistance | Inner-membrane-transporter_mexF       | 160 | 153 | 14.97 | 14.97 | N |
| Antibiotic Resistance | Repressor_nalC                        | 28  | 28  | 14.58 | 14.58 | N |
| Antibiotic Resistance | Beta-lactam_cfxA_2366 Branch          | 67  | 67  | 14.5  | 14.19 | N |
| Antibiotic Resistance | MDR-Efflux-pump_mexJ                  | 40  | 40  | 14.03 | 14.03 | N |
| Antibiotic Resistance | Efflux-pump_triA                      | 43  | 43  | 13.83 | 13.83 | N |
| Antibiotic Resistance | MDR-Efflux-pump_mexN                  | 127 | 127 | 13.54 | 13.54 | N |
| Antibiotic Resistance | Aminoglycoside_aph3'_IIa              | 38  | 38  | 13.52 | 13.52 | N |
| Antibiotic Resistance | MDR-Efflux-pump_oprJ                  | 61  | 54  | 13.47 | 13.47 | N |
| Antibiotic Resistance | MDR-Efflux-pump_mexI                  | 167 | 123 | 13.18 | 13.18 | N |
| Antibiotic Resistance | AR 215_778_2296 Branch                | 33  | 33  | 12.99 | 12.99 | N |
| Antibiotic Resistance | MDR-Efflux-pump_mexH                  | 39  | 39  | 12.3  | 12.3  | N |
| Antibiotic Resistance | Suppressor-of-MexT_mexS               | 36  | 36  | 11.8  | 11.8  | N |
| Antibiotic Resistance | MDR-Efflux-pump_oprN                  | 43  | 43  | 11.38 | 11.38 | N |
| Antibiotic Resistance | Repressor-of-efflux-complex_phoP      | 57  | 57  | 11.22 | 11.22 | N |
| Antibiotic Resistance | MDR-Efflux-pump_opmD                  | 44  | 40  | 11.05 | 11.05 | N |
| Antibiotic Resistance | Efflux-pump_triC                      | 138 | 101 | 10.25 | 10.25 | N |
| Antibiotic Resistance | Involved-in-polymyxin-resistance_pmrB | 83  | 83  | 9.87  | 9.87  | N |
| Antibiotic Resistance | Membrane-fusion-protein_mexA          | 25  | 25  | 7.12  | 7.12  | N |
| Antibiotic Resistance | MDR-Efflux-pump_mexE                  | 24  | 24  | 6.8   | 6.8   | N |
| Antibiotic Resistance | Sensor-protein_phoQ                   | 67  | 62  | 6.22  | 6.22  | N |
| Antibiotic Resistance | AR 214_989_2085 Branch                | 58  | 47  | 5.5   | 5.5   | N |

|                  |                                   |     |     |       |       |   |
|------------------|-----------------------------------|-----|-----|-------|-------|---|
| Virulence Factor | Pseudomonas_aeruginosa_GENE_xcpV  | 90  | 57  | 57    | 57    | Y |
| Virulence Factor | Pseudomonas_aeruginosa_GENE_fliQ  | 48  | 38  | 56.72 | 56.72 | Y |
| Virulence Factor | Pseudomonas_aeruginosa_GENE_lasI  | 163 | 105 | 52.24 | 52.24 | Y |
| Virulence Factor | Pseudomonas_aeruginosa_GENE_pilM  | 176 | 141 | 49.82 | 49.82 | Y |
| Virulence Factor | Pseudomonas_aeruginosa_GENE_lasA  | 166 | 145 | 47.39 | 47.39 | Y |
| Virulence Factor | Pseudomonas_aeruginosa_GENE_pilP  | 91  | 74  | 45.12 | 45.12 | Y |
| Virulence Factor | Pseudomonas_aeruginosa_GENE_Alg44 | 150 | 118 | 44.7  | 44.7  | Y |
| Virulence Factor | Pseudomonas_aeruginosa_GENE_fliJ  | 46  | 40  | 42.1  | 42.1  | Y |
| Virulence Factor | Pseudomonas_aeruginosa_GENE_rhIA  | 161 | 109 | 41.92 | 41.92 | Y |
| Virulence Factor | Pseudomonas_aeruginosa_GENE_pilO  | 102 | 82  | 41.41 | 41.41 | Y |

## Sample A cont.

|                  |                                      |     |     |       |       |   |
|------------------|--------------------------------------|-----|-----|-------|-------|---|
| Virulence Factor | Pseudomonas_aeruginosa_GENE_pchR     | 97  | 84  | 38.71 | 38.71 | N |
| Virulence Factor | Pseudomonas_aeruginosa_GENE_mucC     | 63  | 41  | 38.32 | 38.32 | N |
| Virulence Factor | Pseudomonas_aeruginosa_GENE_xcpX     | 96  | 70  | 37.04 | 37.04 | N |
| Virulence Factor | Pseudomonas_aeruginosa_GENE_fliD     | 208 | 180 | 36.15 | 36.15 | N |
| Virulence Factor | Pseudomonas_aeruginosa_GENE_fliM     | 127 | 109 | 35.05 | 35.05 | N |
| Virulence Factor | Pseudomonas_aeruginosa_GeneID_PA0072 | 105 | 88  | 34.78 | 34.78 | N |
| Virulence Factor | Pseudomonas_aeruginosa_GENE_fleQ     | 142 | 141 | 34.14 | 34.3  | N |
| Virulence Factor | Pseudomonas_aeruginosa_GENE_fleR     | 134 | 133 | 33.93 | 33.93 | N |
| Virulence Factor | Pseudomonas_aeruginosa_GENE_pchG     | 91  | 88  | 33.46 | 33.46 | N |
| Virulence Factor | Pseudomonas_aeruginosa_GENE_lasR     | 70  | 70  | 32.26 | 32.26 | N |
| Virulence Factor | Pseudomonas_aeruginosa_GENE_fliP     | 68  | 68  | 32.08 | 32.08 | N |
| Virulence Factor | Pseudomonas_aeruginosa_GENE_fimT     | 43  | 43  | 31.85 | 31.85 | N |
| Virulence Factor | Pseudomonas_aeruginosa_GENE_fliH     | 107 | 85  | 31.48 | 31.48 | N |
| Virulence Factor | Pseudomonas_aeruginosa_GENE_waaC     | 77  | 77  | 31.3  | 31.3  | N |
| Virulence Factor | Pseudomonas_aeruginosa_GENE_Alg8     | 130 | 130 | 30.95 | 30.95 | N |
| Virulence Factor | Pseudomonas_aeruginosa_GENE_algU     | 60  | 60  | 30.3  | 30.3  | N |
| Virulence Factor | Pseudomonas_aeruginosa_GeneID_PA0086 | 75  | 65  | 30.23 | 30.23 | N |
| Virulence Factor | Pseudomonas_aeruginosa_GENE_xcpW     | 47  | 47  | 30.13 | 30.13 | N |
| Virulence Factor | Pseudomonas_aeruginosa_GENE_pilK     | 99  | 70  | 30.04 | 30.04 | N |
| Virulence Factor | Pseudomonas_aeruginosa_GeneID_PA0084 | 152 | 135 | 29.93 | 29.93 | N |
| Virulence Factor | Pseudomonas_aeruginosa_GENE_fliE     | 29  | 29  | 29.59 | 29.59 | N |
| Virulence Factor | Pseudomonas_aeruginosa_GENE_pilY2    | 29  | 29  | 29.59 | 29.59 | N |
| Virulence Factor | Pseudomonas_aeruginosa_GENE_plcH     | 231 | 160 | 28.93 | 28.93 | N |
| Virulence Factor | Pseudomonas_aeruginosa_GENE_algL     | 77  | 77  | 28.84 | 28.84 | N |
| Virulence Factor | Pseudomonas_aeruginosa_GENE_pchB     | 22  | 22  | 28.57 | 28.57 | N |
| Virulence Factor | Pseudomonas_aeruginosa_GENE_fleN     | 73  | 73  | 28.52 | 28.52 | N |
| Virulence Factor | Pseudomonas_aeruginosa_GENE_pilI     | 38  | 38  | 28.36 | 28.36 | N |
| Virulence Factor | Pseudomonas_aeruginosa_GENE_pvdE     | 134 | 118 | 28.03 | 28.03 | N |
| Virulence Factor | Pseudomonas_aeruginosa_GENE_algR     | 72  | 59  | 27.83 | 27.83 | N |
| Virulence Factor | Pseudomonas_aeruginosa_GENE_xcpR     | 102 | 89  | 27.64 | 27.64 | N |
| Virulence Factor | Pseudomonas_aeruginosa_GeneID_PA0079 | 108 | 100 | 27.32 | 27.32 | N |
| Virulence Factor | Pseudomonas_aeruginosa_GENE_pilV     | 58  | 46  | 26.44 | 26.44 | N |
| Virulence Factor | Pseudomonas_aeruginosa_GENE_flgJ     | 77  | 77  | 26.28 | 26.28 | N |
| Virulence Factor | Pseudomonas_aeruginosa_GeneID_PA0082 | 71  | 67  | 26.27 | 26.27 | N |
| Virulence Factor | Pseudomonas_aeruginosa_GENE_flgD     | 49  | 49  | 25.39 | 25.39 | N |
| Virulence Factor | Pseudomonas_aeruginosa_GENE_algD     | 89  | 87  | 25.36 | 25.36 | N |
| Virulence Factor | Pseudomonas_aeruginosa_GENE_chpB     | 96  | 68  | 25.19 | 25.19 | N |
| Virulence Factor | Pseudomonas_aeruginosa_GENE_fliH     | 157 | 157 | 25.12 | 25.12 | N |

## Sample A cont.

|                  |                                       |     |     |       |       |   |
|------------------|---------------------------------------|-----|-----|-------|-------|---|
| Virulence Factor | Pseudomonas_aeruginosa_GENE_fimV      | 146 | 146 | 25    | 25    | N |
| Virulence Factor | Pseudomonas_aeruginosa_GENE_flgC      | 44  | 32  | 25    | 25    | N |
| Virulence Factor | Pseudomonas_aeruginosa_GENE_xcpZ      | 26  | 26  | 25    | 25    | N |
| Virulence Factor | Pseudomonas_aeruginosa_GENE_vgrG1     | 105 | 103 | 24.82 | 24.82 | N |
| Virulence Factor | Pseudomonas_aeruginosa_GENE_pilQ      | 259 | 149 | 24.71 | 24.71 | N |
| Virulence Factor | Pseudomonas_aeruginosa_GENE_pilJ      | 139 | 139 | 24.51 | 24.51 | N |
| Virulence Factor | Pseudomonas_aeruginosa_GeneID_PAP4746 | 67  | 56  | 24.35 | 24.35 | N |
| Virulence Factor | Pseudomonas_aeruginosa_GENE_algE      | 83  | 83  | 23.58 | 23.58 | N |
| Virulence Factor | Pseudomonas_aeruginosa_GENE_hcp1      | 37  | 29  | 23.58 | 23.58 | N |
| Virulence Factor | Pseudomonas_aeruginosa_GENE_pchH      | 99  | 95  | 23.57 | 23.57 | N |
| Virulence Factor | Pseudomonas_aeruginosa_GENE_pilD      | 59  | 59  | 23.23 | 23.23 | N |
| Virulence Factor | Pseudomonas_aeruginosa_GENE_phzM      | 125 | 69  | 23.08 | 23.08 | N |
| Virulence Factor | Pseudomonas_aeruginosa_GENE_exoT      | 141 | 90  | 22.96 | 22.96 | N |
| Virulence Factor | Pseudomonas_aeruginosa_GENE_pilC      | 117 | 88  | 22.62 | 22.62 | N |
| Virulence Factor | Pseudomonas_aeruginosa_GeneID_PA0083  | 32  | 32  | 22.22 | 22.22 | N |
| Virulence Factor | Pseudomonas_aeruginosa_GeneID_PA0075  | 44  | 39  | 22.16 | 22.16 | N |
| Virulence Factor | Pseudomonas_aeruginosa_GENE_pchF      | 111 | 90  | 22.11 | 22.11 | N |
| Virulence Factor | Pseudomonas_aeruginosa_GENE_algI      | 91  | 91  | 21.93 | 21.93 | N |
| Virulence Factor | Pseudomonas_aeruginosa_GENE_algK      | 100 | 63  | 21.88 | 21.88 | N |
| Virulence Factor | Pseudomonas_aeruginosa_GENE_algG      | 93  | 91  | 21.51 | 21.51 | N |
| Virulence Factor | Streptococcus_pyogenes_GENE_msrD      | 159 | 117 | 21.47 | 21.47 | N |
| Virulence Factor | Pseudomonas_aeruginosa_GENE_aprA      | 86  | 86  | 21.13 | 21.13 | N |
| Virulence Factor | Pseudomonas_aeruginosa_GENE_mucA      | 31  | 31  | 20.53 | 20.53 | N |
| Virulence Factor | Pseudomonas_aeruginosa_GENE_fliR      | 43  | 43  | 20.09 | 20.09 | N |
| Virulence Factor | Pseudomonas_aeruginosa_GENE_flgH      | 44  | 39  | 19.8  | 19.8  | N |
| Virulence Factor | Pseudomonas_aeruginosa_GENE_exoS      | 96  | 79  | 18.81 | 18.81 | N |
| Virulence Factor | Pseudomonas_aeruginosa_GENE_pilA      | 28  | 28  | 18.79 | 18.79 | N |
| Virulence Factor | Pseudomonas_aeruginosa_GENE_xcpS      | 80  | 53  | 18.53 | 18.53 | N |
| Virulence Factor | Pseudomonas_aeruginosa_GENE_rhIL      | 31  | 31  | 18.34 | 18.34 | N |
| Virulence Factor | Pseudomonas_aeruginosa_GENE_pchA      | 62  | 62  | 17.97 | 17.97 | N |
| Virulence Factor | Pseudomonas_aeruginosa_GENE_pilR      | 80  | 70  | 17.5  | 17.5  | N |
| Virulence Factor | Pseudomonas_aeruginosa_GENE_pchE      | 78  | 64  | 17.39 | 17.39 | N |
| Virulence Factor | Pseudomonas_aeruginosa_GENE_waaP      | 42  | 40  | 17.17 | 17.17 | N |
| Virulence Factor | Pseudomonas_aeruginosa_GENE_xcpQ      | 80  | 78  | 17.03 | 17.03 | N |
| Virulence Factor | Pseudomonas_aeruginosa_GENE_fliF      | 88  | 88  | 16.96 | 16.96 | N |
| Virulence Factor | Pseudomonas_aeruginosa_GENE_mucB      | 39  | 39  | 16.96 | 16.96 | N |
| Virulence Factor | Pseudomonas_aeruginosa_GENE_waaA      | 47  | 47  | 16.61 | 16.61 | N |
| Virulence Factor | Pseudomonas_aeruginosa_GENE_algQ      | 22  | 22  | 16.54 | 16.54 | N |

## Sample A cont.

|                  |                                             |     |    |       |       |   |
|------------------|---------------------------------------------|-----|----|-------|-------|---|
| Virulence Factor | <i>Pseudomonas_aeruginosa_GeneID_PA0087</i> | 19  | 19 | 16.52 | 16.52 | N |
| Virulence Factor | <i>Pseudomonas_aeruginosa_GENE_pilH</i>     | 18  | 18 | 16.51 | 16.51 | N |
| Virulence Factor | <i>Pseudomonas_aeruginosa_GENE_flgK</i>     | 101 | 89 | 16.48 | 16.48 | N |
| Virulence Factor | <i>Pseudomonas_aeruginosa_GENE_fliC</i>     | 51  | 51 | 16.04 | 16.04 | N |
| Virulence Factor | <i>Pseudomonas_aeruginosa_GENE_wzy</i>      | 115 | 90 | 15.99 | 15.99 | N |
| Virulence Factor | <i>Pseudomonas_aeruginosa_GENE_pilS</i>     | 79  | 68 | 15.93 | 15.93 | N |
| Virulence Factor | <i>Pseudomonas_aeruginosa_GENE_pvdA</i>     | 51  | 45 | 15.73 | 15.73 | N |
| Virulence Factor | <i>Pseudomonas_aeruginosa_GENE_algJ</i>     | 45  | 44 | 15.66 | 15.66 | N |
| Virulence Factor | <i>Pseudomonas_aeruginosa_GENE_ppkA</i>     | 78  | 78 | 15.35 | 15.35 | N |
| Virulence Factor | <i>Pseudomonas_aeruginosa_GENE_toxA</i>     | 85  | 73 | 15.3  | 15.3  | N |
| Virulence Factor | <i>Pseudomonas_aeruginosa_GeneID_PA0088</i> | 87  | 74 | 15.16 | 15.16 | N |
| Virulence Factor | <i>Pseudomonas_aeruginosa_GENE_algZ</i>     | 45  | 45 | 15.15 | 15.15 | N |
| Virulence Factor | <i>Pseudomonas_aeruginosa_GENE_pilB</i>     | 97  | 87 | 14.85 | 14.85 | N |
| Virulence Factor | <i>Pseudomonas_aeruginosa_GeneID_PA0081</i> | 62  | 53 | 14.4  | 14.4  | N |
| Virulence Factor | <i>Pseudomonas_aeruginosa_GENE_fliH</i>     | 30  | 30 | 14.29 | 14.29 | N |
| Virulence Factor | <i>Pseudomonas_aeruginosa_GENE_lasB</i>     | 45  | 45 | 13.8  | 13.8  | N |
| Virulence Factor | <i>Pseudomonas_aeruginosa_GENE_pilX</i>     | 24  | 24 | 13.71 | 13.71 | N |
| Virulence Factor | <i>Pseudomonas_aeruginosa_GENE_fliH</i>     | 41  | 41 | 13.49 | 13.49 | N |
| Virulence Factor | <i>Pseudomonas_aeruginosa_GENE_pilT</i>     | 37  | 37 | 13.21 | 13.21 | N |
| Virulence Factor | <i>Pseudomonas_aeruginosa_GeneID_PA0073</i> | 21  | 21 | 12.65 | 12.65 | N |
| Virulence Factor | <i>Pseudomonas_aeruginosa_GENE_icmF1</i>    | 64  | 64 | 12.62 | 12.62 | N |
| Virulence Factor | <i>Pseudomonas_aeruginosa_GENE_pilF</i>     | 28  | 28 | 12.5  | 12.5  | N |
| Virulence Factor | <i>Enterobacter_GENE_tpx</i>                | 38  | 38 | 12.3  | 12.3  | N |
| Virulence Factor | <i>Bacteroides_fragilis_GENE_mobA</i>       | 18  | 18 | 12.08 | 12.08 | N |
| Virulence Factor | <i>Pseudomonas_aeruginosa_GeneID_PA0078</i> | 46  | 33 | 11.7  | 11.7  | N |
| Virulence Factor | <i>Pseudomonas_aeruginosa_GENE_clpV1</i>    | 46  | 46 | 11.7  | 11.7  | N |
| Virulence Factor | <i>Pseudomonas_aeruginosa_GENE_exoY</i>     | 42  | 42 | 11.63 | 11.63 | N |
| Virulence Factor | <i>Pseudomonas_aeruginosa_GENE_chpD</i>     | 17  | 17 | 11.33 | 11.33 | N |
| Virulence Factor | <i>Pseudomonas_aeruginosa_GENE_chpE</i>     | 16  | 16 | 11.27 | 11.27 | N |
| Virulence Factor | <i>Pseudomonas_aeruginosa_GENE_pchC</i>     | 18  | 18 | 11.04 | 11.04 | N |
| Virulence Factor | <i>Pseudomonas_aeruginosa_GENE_fptA</i>     | 53  | 53 | 10.19 | 10.19 | N |
| Virulence Factor | <i>Bacteroides_fragilis_GENE_mobB</i>       | 41  | 41 | 9.88  | 9.88  | N |
| Virulence Factor | <i>Pseudomonas_aeruginosa_GeneID_PA0076</i> | 15  | 15 | 9.38  | 9.38  | N |
| Virulence Factor | <i>Pseudomonas_aeruginosa_GENE_pchl</i>     | 29  | 29 | 9.18  | 9.18  | N |
| Virulence Factor | <i>Pseudomonas_aeruginosa_GENE_fimU</i>     | 29  | 15 | 9.09  | 9.09  | N |
| Virulence Factor | <i>Pseudomonas_aeruginosa_GENE_pchD</i>     | 34  | 34 | 9.02  | 9.02  | N |
| Virulence Factor | <i>Pseudomonas_aeruginosa_GENE_pilW</i>     | 20  | 20 | 8.51  | 8.51  | N |
| Virulence Factor | <i>Pseudomonas_aeruginosa_GENE_xcpP</i>     | 16  | 16 | 8.47  | 8.47  | N |

Sample A cont.

|                  |                                    |    |    |      |      |   |
|------------------|------------------------------------|----|----|------|------|---|
| Virulence Factor | Pseudomonas_aeruginosa_GENE_waaF   | 32 | 23 | 8.36 | 8.36 | N |
| Virulence Factor | Enterobacter_GENE_espF_2378 Branch | 41 | 41 | 8.28 | 8.28 | N |
| Virulence Factor | Pseudomonas_aeruginosa_GENE_algB   | 35 | 29 | 7.84 | 8.09 | N |
| Virulence Factor | Pseudomonas_aeruginosa_GENE_flgG   | 18 | 18 | 7.38 | 7.38 | N |
| Virulence Factor | Pseudomonas_aeruginosa_GENE_algX   | 24 | 24 | 7.21 | 7.21 | N |
| Virulence Factor | Pseudomonas_aeruginosa_GENE_xcpY   | 22 | 16 | 6.9  | 6.9  | N |
| Virulence Factor | Bacteroides_fragilis_GENE_rteA     | 55 | 55 | 6.12 | 6.12 | N |
| Virulence Factor | Pseudomonas_aeruginosa_GENE_phzS   | 18 | 18 | 6    | 6    | N |
| Virulence Factor | Pseudomonas_aeruginosa_GENE_flgE   | 22 | 22 | 5.33 | 5.33 | N |
| Virulence Factor | Pseudomonas_aeruginosa_GENE_algA   | 22 | 22 | 5.06 | 5.06 | N |

Sample B.

| Database          | Organism                                  | Unique Matches Frequency | Unique Matches | % Unique Matches | % Total Matches | Relative Abundance | Above_Threshold |
|-------------------|-------------------------------------------|--------------------------|----------------|------------------|-----------------|--------------------|-----------------|
| Bacteria          | Bacteroides_fragilis_str_1242 Branch      | 66                       | 63             | 1.28             | 1.85            | 81.37              | Y               |
| Bacteria          | Lactobacillus_5304 Branch                 | 22                       | 22             | 0.18             | 0.18            | 3.508              | N               |
| Bacteria          | Bacteroides_819 Branch                    | 17                       | 17             | 0.04             | 0.04            | 1.735              | N               |
| Bacteria          | Bacteroides_stercoris_ATCC_43183          | 81                       | 79             | 0.1              | 0.13            | 2.705              | N               |
| Bacteria          | Bifidobacterium_longum_subsp_infantis_EK3 | 52                       | 52             | 0.11             | 0.13            | 2.619              | N               |
| Bacteria          | Bacteroides_caccae_924 Branch             | 93                       | 93             | 0.05             | 0.05            | 1.688              | N               |
| Bacteria          | Clostridiales_Order_18_2486_26738 Branch  | 47                       | 47             | 0.06             | 0.06            | 1.621              | N               |
| Bacteria          | Bacteroides_eggerthii_1_2_48FAA           | 36                       | 36             | 0.05             | 0.08            | 1.125              | N               |
| Bacteria          | Bacteroides_thetaiotaomicron_dnLKV9       | 44                       | 40             | 0.04             | 0.04            | 0.919              | N               |
| Bacteria          | Faecalibacterium_cf_prausnitzii_KLE1255   | 58                       | 58             | 0.03             | 0.04            | 0.8062             | N               |
| Bacteria          | Faecalibacterium_prausnitzii_SL3_3        | 32                       | 32             | 0.03             | 0.06            | 0.6653             | N               |
| Bacteria          | Alistipes_1161 Branch                     | 35                       | 35             | 0.02             | 0.02            | 0.621              | N               |
| Bacteria          | Bacteroides_dorei_isolate_HS1_L_1_B_010   | 13                       | 13             | 0.04             | 0.02            | 0.6202             | N               |
| Virus             | Rosellinia_necatrix_partitivirus_2        | 259                      | 10             | 0.58             | 0.58            | 66.19              | Y               |
| Virus             | Pseudomonas_phage_Pf1                     | 48                       | 48             | 1.87             | 1.87            | 33.81              | Y               |
| Respiratory Virus | no calls detected above threshold         |                          |                |                  |                 |                    |                 |
| Fungi             | no calls detected above threshold         |                          |                |                  |                 |                    |                 |
| Protist           | Sarcocystis_neurona_strain_SN1            | 4549                     | 397            | 0.82             | 0.35            | 96.2               | Y               |
| Protist           | Toxoplasma_gondii_CtCo5                   | 366                      | 10             | 0.02             | 0.01            | 3.799              | Y               |



Sample B cont.

|                       |                                      |    |    |       |       |   |
|-----------------------|--------------------------------------|----|----|-------|-------|---|
| Antibiotic Resistance | Repressor-of-efflux-complex_nfxB     | 43 | 43 | 24.16 | 24.16 | N |
| Antibiotic Resistance | Outer-membrane-factor_oprM           | 35 | 35 | 8.43  | 8.43  | N |
| Virulence Factor      | Escherichia_coli_GENE_mcmA           | 38 | 38 | 18.63 | 18.63 | N |
| Virulence Factor      | Pseudomonas_aeruginosa_GeneID_PA0086 | 17 | 17 | 7.91  | 7.91  | N |
| Virulence Factor      | Pseudomonas_aeruginosa_GENE_fimV     | 40 | 40 | 6.85  | 6.85  | N |
| Virulence Factor      | Pseudomonas_aeruginosa_GENE_flgK     | 34 | 34 | 6.3   | 6.3   | N |
| Virulence Factor      | Pseudomonas_aeruginosa_GENE_pilK     | 14 | 14 | 6.01  | 6.01  | N |

Sample C.

| Database              | Organism                              | Unique Matches Frequency | Unique Matches | % Unique Matches | % Total Matches | Relative Abundance | Above Threshold |
|-----------------------|---------------------------------------|--------------------------|----------------|------------------|-----------------|--------------------|-----------------|
| Bacteria              | Propionibacterium_20956 Branch        | 42                       | 29             | 0.24             | 0.17            | 47.14              | N               |
| Bacteria              | Staphylococcus_aureus_11902 Branch    | 10                       | 10             | 0.27             | 0.36            | 27.27              | N               |
| Bacteria              | StaphEpidermidis 242_6162 Branch      | 18                       | 16             | 0.15             | 0.13            | 18.86              | N               |
| Bacteria              | Staphylococcus_hominis_6333 Branch    | 23                       | 16             | 0.05             | 0.04            | 6.729              | N               |
| Virus                 | no calls detected above threshold     |                          |                |                  |                 |                    |                 |
| Respiratory Virus     | no calls detected above threshold     |                          |                |                  |                 |                    |                 |
| Fungi                 | no calls detected above threshold     |                          |                |                  |                 |                    |                 |
| Protist               | no calls detected above threshold     |                          |                |                  |                 |                    |                 |
| Antibiotic Resistance | no calls detected above threshold     |                          |                |                  |                 |                    |                 |
| Virulence Factor      | Staphylococcus_aureus_GI_33390919     | 66                       | 38             | 19.1             | 20.45           |                    | N               |
| Virulence Factor      | Staphylococcus_aureus_GeneID_SAS0111  | 62                       | 62             | 16.45            | 16.45           |                    | N               |
| Virulence Factor      | Staphylococcus_aureus_GeneID_SASa1133 | 48                       | 48             | 10.88            | 10.88           |                    | N               |
| Virulence Factor      | Staphylococcus_aureus_GeneID_SASa2284 | 33                       | 33             | 7.47             | 7.47            |                    | N               |

Sample D.

| Database | Organism                                        | Unique Matches Frequency | Unique Matches | % Unique Matches | % Total Matches | Relative Abundance | Above Threshold |
|----------|-------------------------------------------------|--------------------------|----------------|------------------|-----------------|--------------------|-----------------|
| Bacteria | Georgenia_sp_SUBG003                            | 271                      | 15             | 0.01             | 0.01            | 53.9               | N               |
| Bacteria | Dermacoccus_20818 Branch                        | 33                       | 28             | 0.02             | 0.02            | 27.33              | N               |
| Bacteria | candidate_division_TM7_single_cell_isolate_TM7a | 21                       | 16             | 0.02             | 0.02            | 18.77              | N               |

Virus no calls detected above threshold

Fungi no calls detected above threshold

Protist no calls detected above threshold

Antibiotic Resistance no calls detected above threshold

Virulence Factor no calls detected above threshold

Sample E.

| Database              | Organism                          | Taxonomy | Unique Matches Frequency | Unique Matches | % Unique Matches | % Total Matches | Relative Abundance | Above_Threshold |
|-----------------------|-----------------------------------|----------|--------------------------|----------------|------------------|-----------------|--------------------|-----------------|
| Bacteria              | Faecalibacterium_27364            | Branch   |                          | 3              | 3                | 0.22            | 0.22               | 100 N           |
| Virus                 | no calls detected above threshold |          |                          |                |                  |                 |                    |                 |
| Fungi                 | no calls detected above threshold |          |                          |                |                  |                 |                    |                 |
| Protist               | no calls detected above threshold |          |                          |                |                  |                 |                    |                 |
| Antibiotic Resistance | no calls detected above threshold |          |                          |                |                  |                 |                    |                 |
| Virulence Factor      | no calls detected above threshold |          |                          |                |                  |                 |                    |                 |

Sample 1.

| Database | Organism                                           | Unique Matches<br>Frequency | Unique<br>Matches | % Unique<br>Matches | % Total<br>Matches | Relative<br>Abundance | Above<br>Threshold |
|----------|----------------------------------------------------|-----------------------------|-------------------|---------------------|--------------------|-----------------------|--------------------|
| Bacteria | Propionibacterium_sp_KPL1854                       | 28                          | 28                | 3.51                | 19.58              | 57.04                 | Y                  |
| Bacteria | Clostridium_autoethanogenum_DSM_10061              | 1536                        | 1212              | 3.2                 | 6.96               | 10.81                 | Y                  |
| Bacteria | Clostridium_ljungdahlii_DSM_13528                  | 2013                        | 1575              | 3.2                 | 6.73               | 10.78                 | Y                  |
| Bacteria | Lachnospiraceae_bacterium_A4                       | 5178                        | 4737              | 2.42                | 2.42               | 6.602                 | Y                  |
| Bacteria | Oscillibacter_sp_1_3                               | 1532                        | 1405              | 0.71                | 0.73               | 1.6                   | N                  |
| Bacteria | Staphylococcus_6058 Branch                         | 13                          | 13                | 0.78                | 0.79               | 0.9093                | N                  |
| Bacteria | Firmicutes_bacterium_ASF500                        | 1063                        | 931               | 0.51                | 0.51               | 1.093                 | N                  |
| Bacteria | Enterococcus_faecalis_EnGen_5094 Branch            | 19                          | 17                | 0.86                | 0.71               | 0.7987                | N                  |
| Bacteria | Lactococcus_lactis_subsp_cremoris_4115 Branch      | 54                          | 53                | 0.17                | 0.17               | 0.526                 | N                  |
| Bacteria | Clostridium_sp_ASF502                              | 645                         | 604               | 0.31                | 0.31               | 0.606                 | N                  |
| Bacteria | Propionibacterium_acnes_SK182B_JCVI                | 563                         | 538               | 0.31                | 0.31               | 0.6035                | N                  |
| Bacteria | Enterococcus_faecium_1_231_501                     | 35                          | 34                | 0.51                | 0.69               | 0.5678                | N                  |
| Bacteria | Pseudomonas_aeruginosa_strain_AZPAE14829           | 23                          | 23                | 0.56                | 0.33               | 0.5484                | N                  |
| Bacteria | Anaerotruncus_sp_G32012                            | 594                         | 528               | 0.28                | 0.29               | 0.5396                | N                  |
| Bacteria | Peptoclostridium_difficile_27096 Branch            | 14                          | 10                | 0.65                | 0.65               | 0.5335                | N                  |
| Bacteria | Oscillibacter_valericigenes_Sjm18_20               | 543                         | 525               | 0.27                | 0.28               | 0.5116                | N                  |
| Bacteria | Eubacterium_plexicaudatum_ASF492                   | 555                         | 509               | 0.26                | 0.28               | 0.5021                | N                  |
| Bacteria | Dorea_sp_5_2                                       | 477                         | 434               | 0.22                | 0.22               | 0.4179                | N                  |
| Bacteria | Staphylococcus_hominis_6333 Branch                 | 32                          | 32                | 0.1                 | 0.09               | 0.298                 | N                  |
| Bacteria | Erysipelotrichaceae_bacterium_6_1_45               | 70                          | 66                | 0.2                 | 0.19               | 0.2671                | N                  |
| Bacteria | Streptococcus_thermophilus_2097 Branch             | 18                          | 16                | 0.07                | 0.08               | 0.2191                | N                  |
| Bacteria | Finegoldia_magna_42689 Branch                      | 14                          | 14                | 0.07                | 0.06               | 0.1689                | N                  |
| Bacteria | Megasphaera_elsdenii_14260 Branch                  | 89                          | 83                | 0.1                 | 0.1                | 0.2073                | N                  |
| Bacteria | Corynebacterium_accolens_ATCC_49725                | 60                          | 51                | 0.15                | 0.15               | 0.1897                | N                  |
| Bacteria | Stenotrophomonas_maltophilia_JV3                   | 201                         | 195               | 0.12                | 0.12               | 0.1882                | N                  |
| Bacteria | Geobacillus_stearothermophilus_strain_12847 Branch | 75                          | 75                | 0.13                | 0.17               | 0.1687                | N                  |
| Bacteria | Delftia_acidovorans_SPH_1                          | 126                         | 124               | 0.11                | 0.15               | 0.1631                | N                  |
| Bacteria | Acinetobacter_junii_41991 Branch                   | 15                          | 15                | 0.14                | 0.09               | 0.1374                | N                  |
| Bacteria | Eubacterium_sp_14_2                                | 172                         | 164               | 0.09                | 0.09               | 0.1418                | N                  |
| Bacteria | Prevotella_copri_DSM_18205                         | 178                         | 165               | 0.09                | 0.09               | 0.1385                | N                  |
| Bacteria | Staphylococcus_capitis_QN1                         | 11                          | 11                | 0.18                | 0.18               | 0.1373                | N                  |

.Sample 1 cont.

|          |                                               |     |     |      |      |         |   |
|----------|-----------------------------------------------|-----|-----|------|------|---------|---|
| Bacteria | Kocuria_rhizophila_P7_4                       | 109 | 109 | 0.09 | 0.18 | 0.1363  | N |
| Bacteria | Lactobacillus_johnsonii_NCC_533               | 28  | 26  | 0.12 | 0.14 | 0.1261  | N |
| Bacteria | Christensenella_timonensis_Marseille_P2437    | 142 | 126 | 0.07 | 0.1  | 0.1075  | N |
| Bacteria | Clostridiales_26672 Branch                    | 48  | 47  | 0.04 | 0.04 | 0.07718 | N |
| Bacteria | Streptococcus_2988 Branch                     | 24  | 21  | 0.07 | 0.07 | 0.0871  | N |
| Bacteria | Prevotella_bivia_853 Branch                   | 24  | 24  | 0.03 | 0.03 | 0.09634 | N |
| Bacteria | Propionibacterium_granulosum_TM11             | 34  | 34  | 0.09 | 0.11 | 0.09473 | N |
| Bacteria | Rothia_mucilaginosa_20589 Branch              | 29  | 29  | 0.07 | 0.06 | 0.0805  | N |
| Bacteria | Acidovorax_25090 Branch                       | 68  | 68  | 0.05 | 0.05 | 0.08147 | N |
| Bacteria | Oscillibacter_ruminantium_GH1                 | 116 | 115 | 0.06 | 0.08 | 0.08546 | N |
| Bacteria | Clostridiales_Order_18_3421_27046 Branch      | 85  | 81  | 0.05 | 0.07 | 0.08036 | N |
| Bacteria | Corynebacterium_sp_GD7                        | 104 | 97  | 0.06 | 0.06 | 0.08245 | N |
| Bacteria | Klebsiella_35782 Branch                       | 20  | 19  | 0.03 | 0.04 | 0.08021 | N |
| Bacteria | Prevotella_disiens_JCM_6334_ATCC_29426        | 26  | 26  | 0.08 | 0.08 | 0.0762  | N |
| Bacteria | Delftia_sp_670                                | 41  | 41  | 0.06 | 0.13 | 0.0756  | N |
| Bacteria | Achromobacter_xylooxidans_X02736              | 88  | 88  | 0.05 | 0.06 | 0.07242 | N |
| Bacteria | Pseudomonas_syringae_pv_pisi_str_PP1          | 67  | 14  | 0.04 | 0.03 | 0.0668  | N |
| Bacteria | Clostridium_scatologenes                      | 89  | 70  | 0.05 | 0.05 | 0.06651 | N |
| Bacteria | Rothia_dentocariosa_20586 Branch              | 29  | 29  | 0.04 | 0.04 | 0.0595  | N |
| Bacteria | Mycobacterium_abscessus_MAB_082312_2273       | 82  | 82  | 0.04 | 0.04 | 0.05694 | N |
| Bacteria | Lactobacillus_sakei_5706 Branch               | 17  | 17  | 0.03 | 0.03 | 0.05689 | N |
| Bacteria | Bacillus_cereus_VD102                         | 16  | 16  | 0.06 | 0.08 | 0.0554  | N |
| Bacteria | Clostridium_carboxidivorans_P7                | 68  | 54  | 0.04 | 0.08 | 0.05563 | N |
| Bacteria | Peptoniphilus_harei_ACS_146_V_Sch2b           | 36  | 36  | 0.05 | 0.05 | 0.05439 | N |
| Bacteria | Porphyromonas_bennonis_DSM_23058_JCM_16335    | 51  | 50  | 0.04 | 0.04 | 0.04825 | N |
| Bacteria | Facklamia_hominis_4212 Branch                 | 18  | 18  | 0.03 | 0.03 | 0.04161 | N |
| Bacteria | Corynebacterium_pseudogenitalium_ATCC_33035   | 39  | 39  | 0.04 | 0.04 | 0.04359 | N |
| Bacteria | Dolosigranulum_pigrum_ATCC_51524              | 50  | 42  | 0.04 | 0.04 | 0.04345 | N |
| Bacteria | Clostridium_methylpentosum_DSM_5476           | 73  | 64  | 0.03 | 0.05 | 0.04337 | N |
| Bacteria | Intestinimonas_butyriciproducens              | 67  | 64  | 0.03 | 0.03 | 0.04237 | N |
| Bacteria | Phascolarctobacterium_succinatutens_YIT_12067 | 37  | 37  | 0.04 | 0.03 | 0.0393  | N |
| Bacteria | Bacteroides_uniformis_dnLKV2                  | 34  | 30  | 0.04 | 0.02 | 0.03861 | N |
| Bacteria | GlobalTree_4354_Node_14006                    | 14  | 14  | 0.02 | 0.02 | 0.03628 | N |

.Sample 1 cont.

|          |                                            |      |     |      |      |         |   |
|----------|--------------------------------------------|------|-----|------|------|---------|---|
| Bacteria | Carnobacterium_maltaromaticum_5850 Branch  | 12   | 12  | 0.01 | 0.01 | 0.03495 | N |
| Bacteria | Staphylococcus_6307 Branch                 | 37   | 36  | 0.03 | 0.03 | 0.03514 | N |
| Bacteria | Prevotella_sp_P5_60                        | 15   | 12  | 0.04 | 0.11 | 0.03482 | N |
| Bacteria | Prevotella_corporis_DSM_18810_JCM_8529     | 53   | 47  | 0.03 | 0.03 | 0.03471 | N |
| Bacteria | Lactococcus_raffinolactis_4877             | 40   | 38  | 0.03 | 0.03 | 0.03078 | N |
| Bacteria | Pseudoflavonifractor_capillosus_ATCC_29799 | 54   | 49  | 0.03 | 0.03 | 0.03095 | N |
| Bacteria | Caulobacter_sp_JGI_0001013_D04             | 13   | 10  | 0.04 | 0.02 | 0.03058 | N |
| Bacteria | Clostridium_acetobutylicum_27843 Branch    | 12   | 10  | 0.01 | 0.01 | 0.03006 | N |
| Bacteria | Staphylococcus_lugdunensis_6250 Branch     | 14   | 14  | 0.01 | 0.01 | 0.02991 | N |
| Virus    | Murine_type_C_retrovirus                   | 48   | 48  | 2.08 | 1.76 | 37.36   | Y |
| Virus    | Streptococcus_phage_DT1                    | 70   | 70  | 0.96 | 0.85 | 15.7    | N |
| Virus    | Lactococcus_phage_BK5_T                    | 89   | 89  | 0.71 | 0.55 | 12.21   | N |
| Virus    | Propionibacterium_phage_P100D              | 31   | 25  | 0.68 | 0.68 | 9.1     | N |
| Virus    | PreXMRV_1                                  | 18   | 18  | 0.77 | 0.68 | 8.76    | N |
| Virus    | Human_adenovirus_C                         | 15   | 15  | 0.35 | 1.04 | 3.771   | N |
| Virus    | Enterobacteria_phage_9g                    | 50   | 50  | 0.18 | 0.18 | 2.766   | N |
| Virus    | Yersinia_phage_L_413C                      | 14   | 14  | 0.22 | 0.2  | 2.292   | N |
| Virus    | Phage_phi_OH2                              | 29   | 29  | 0.17 | 0.17 | 2.257   | N |
| Virus    | Staphylococcus_phage_StB20                 | 33   | 33  | 0.16 | 0.16 | 2.121   | N |
| Virus    | Pseudomonas_phage_vB_PaeP_Tr60_Ab31        | 27   | 17  | 0.1  | 0.1  | 1.349   | N |
| Virus    | Cronobacter_phage_CR_2542 Branch           | 32   | 32  | 0.09 | 0.08 | 1.251   | N |
| Virus    | Bacillus_phage_Waukesha92                  | 12   | 12  | 0.11 | 0.1  | 1.058   | N |
| Fungi    | Malassezia_restricta_CBS_7877              | 127  | 122 | 0.19 | 0.19 | 100     | N |
| Protist  | Plasmodium_yoelii_yoelii                   | 1114 | 492 | 0.89 | 0.41 | 81.18   | Y |

.Sample 1 cont.

|                       |                                     |     |     |       |       |       |   |
|-----------------------|-------------------------------------|-----|-----|-------|-------|-------|---|
| Protist               | Plasmodium_berghei_ANKA             | 342 | 169 | 0.26  | 0.26  | 18.82 | Y |
| Antibiotic Resistance | Tetracycline_tetW                   | 297 | 220 | 13.46 | 13.46 |       | N |
| Antibiotic Resistance | Tetracycline_tet40                  | 23  | 23  | 25.28 | 9.14  |       | N |
| Antibiotic Resistance | Tetracycline_tetO                   | 68  | 68  | 7.82  | 7.82  |       | N |
| Antibiotic Resistance | Macrolide_vgaA_2099 Branch          | 53  | 53  | 6.12  | 6.12  |       | N |
| Virulence Factor      | Enterobacter_aerogenes_GENE_upf54.8 | 35  | 35  | 37.23 | 37.23 |       | N |
| Virulence Factor      | Bacillus_anthraxis_GeneID_BASa3239  | 57  | 57  | 12.58 | 12.58 |       | N |
| Virulence Factor      | Staphylococcus_lentus_GENE_pre      | 59  | 59  | 11.97 | 11.97 |       | N |



Sample 15.

| Database | Organism                                 | Unique Matches<br>Frequency | Unique<br>Matches | % Unique<br>Matches | % Total<br>Matches | Relative<br>Abundance | Above<br>Threshold |
|----------|------------------------------------------|-----------------------------|-------------------|---------------------|--------------------|-----------------------|--------------------|
| Bacteria | Propionibacterium_sp_KPL1854             | 42                          | 33                | 4.14                | 46.31              | 48.59                 | Y                  |
| Bacteria | Propionibacterium_acnes_KPA171202        | 26                          | 22                | 2.95                | 46.34              | 43.83                 | Y                  |
| Bacteria | Staphylococcus_epidermidis_AG42          | 35                          | 35                | 1.27                | 2.85               | 2.433                 | Y                  |
| Bacteria | Staphylococcus_capitis_QN1               | 91                          | 89                | 1.44                | 0.88               | 0.7921                | N                  |
| Bacteria | Lactobacillus_5619 Branch                | 140                         | 119               | 0.52                | 0.52               | 0.6061                | N                  |
| Bacteria | Clostridium_ljungdahlii_DSM_13528        | 276                         | 272               | 0.55                | 1.09               | 0.4009                | N                  |
| Bacteria | Streptococcus_thermophilus_2097 Branch   | 30                          | 30                | 0.14                | 0.17               | 0.1917                | N                  |
| Bacteria | Clostridium_autoethanogenum_DSM_1001     | 153                         | 153               | 0.4                 | 1.1                | 0.2627                | N                  |
| Bacteria | Staphylococcus_hominis_6333 Branch       | 86                          | 81                | 0.26                | 0.27               | 0.2034                | N                  |
| Bacteria | Kocuria_rhizophila_P7_4                  | 341                         | 308               | 0.27                | 0.46               | 0.2016                | N                  |
| Bacteria | StaphEpidermidis_242_6162 Branch         | 37                          | 28                | 0.26                | 1.84               | 0.1734                | N                  |
| Bacteria | Propionibacterium_granulosum_TM11        | 94                          | 87                | 0.22                | 0.31               | 0.1303                | N                  |
| Bacteria | Peptoniphilus_rhinitidis_1_13            | 122                         | 112               | 0.18                | 0.18               | 0.1104                | N                  |
| Bacteria | Prevotella_bivia_DNF_857 Branch          | 17                          | 14                | 0.22                | 0.12               | 0.1062                | N                  |
| Bacteria | Peptoniphilus_harei_ACS_146_V_Sch2b      | 120                         | 120               | 0.16                | 0.16               | 0.1006                | N                  |
| Bacteria | Prevotella_disiens_JCM_6334_ATCC_2942    | 67                          | 63                | 0.18                | 0.18               | 0.09915               | N                  |
| Bacteria | Acinetobacter_junii_SH205                | 49                          | 37                | 0.15                | 0.46               | 0.07901               | N                  |
| Bacteria | Propionibacterium_humerusii_20948 Bran   | 15                          | 15                | 0.01                | 0.01               | 0.06725               | N                  |
| Bacteria | Pseudomonas_fluorescens_NZ007            | 186                         | 180               | 0.09                | 0.09               | 0.06202               | N                  |
| Bacteria | Corynebacterium_sp_GD7                   | 174                         | 156               | 0.09                | 0.09               | 0.06205               | N                  |
| Bacteria | Roseomonas_23661 Branch                  | 100                         | 95                | 0.05                | 0.05               | 0.04951               | N                  |
| Bacteria | Lactococcus_lactis_subsp_cremoris_4115 l | 31                          | 29                | 0.09                | 0.09               | 0.05344               | N                  |
| Bacteria | Acidovorax_sp_JS42                       | 125                         | 122               | 0.09                | 0.19               | 0.05523               | N                  |
| Bacteria | Rothia_dentocariosa_M567                 | 93                          | 93                | 0.08                | 0.13               | 0.04919               | N                  |
| Bacteria | Stenotrophomonas_maltophilia_JV3         | 136                         | 130               | 0.08                | 0.08               | 0.04916               | N                  |
| Bacteria | Staphylococcus_sp_6240 Branch            | 93                          | 83                | 0.08                | 0.08               | 0.04848               | N                  |
| Bacteria | Acidovorax_ebreus_TPSY                   | 102                         | 94                | 0.08                | 0.19               | 0.04766               | N                  |
| Bacteria | Prevotella_sp_P_1307 Branch              | 87                          | 87                | 0.07                | 0.07               | 0.04334               | N                  |
| Bacteria | Delftia_acidovorans_SPH_1                | 97                          | 87                | 0.08                | 0.12               | 0.04592               | N                  |
| Bacteria | Prevotella_corporis_DSM_18810_JCM_857    | 129                         | 117               | 0.07                | 0.07               | 0.04427               | N                  |
| Bacteria | Corynebacterium_pseudogenitalium_ATCC    | 79                          | 77                | 0.08                | 0.08               | 0.0429                | N                  |

## Sample 15 cont.

|          |                                               |    |    |      |      |           |
|----------|-----------------------------------------------|----|----|------|------|-----------|
| Bacteria | <i>Streptococcus_sp_2_1_36FAA</i>             | 53 | 53 | 0.08 | 0.09 | 0.04101 N |
| Bacteria | <i>Corynebacterium_tuberculostearicum_SK1</i> | 69 | 68 | 0.07 | 0.07 | 0.04019 N |
| Bacteria | <i>Streptococcus_mitis_strain_SK271</i>       | 14 | 14 | 0.11 | 0.1  | 0.03928 N |
| Bacteria | <i>Finegoldia_magna_ATCC_53516</i>            | 53 | 51 | 0.07 | 0.12 | 0.03533 N |
| Bacteria | <i>Micrococcus_luteus_strain_RIT324w</i>      | 30 | 30 | 0.08 | 0.09 | 0.03511 N |
| Bacteria | <i>Staphylococcus_6338 Branch</i>             | 18 | 18 | 0.09 | 0.14 | 0.03354 N |
| Bacteria | GlobalTree 4354 Node_14006                    | 21 | 19 | 0.03 | 0.03 | 0.02828 N |
| Bacteria | <i>Lactobacillus_sakei_5706 Branch</i>        | 23 | 23 | 0.04 | 0.04 | 0.02913 N |
| Bacteria | <i>Caulobacter_sp_JGI_0001013_D04</i>         | 19 | 19 | 0.07 | 0.04 | 0.02832 N |
| Bacteria | <i>Staphylococcus_6215 Branch</i>             | 16 | 13 | 0.05 | 0.07 | 0.02682 N |
| Bacteria | <i>Serratia_marcescens_s_35630 Branch</i>     | 45 | 36 | 0.04 | 0.04 | 0.0241 N  |
| Bacteria | <i>Varibaculum_cambriense_DSM_15806</i>       | 70 | 56 | 0.04 | 0.05 | 0.02517 N |
| Bacteria | <i>Anaerococcus_senegalensis_JC48</i>         | 29 | 28 | 0.05 | 0.05 | 0.02436 N |
| Bacteria | <i>Haemophilus_sputorum_38065 Branch</i>      | 29 | 28 | 0.03 | 0.03 | 0.0234 N  |
| Bacteria | <i>Dolosigranulum_pigrum_ATCC_51524</i>       | 56 | 54 | 0.05 | 0.05 | 0.02412 N |
| Bacteria | <i>Corynebacterium_tuscaniense_DNF00037</i>   | 76 | 76 | 0.04 | 0.04 | 0.02375 N |
| Bacteria | <i>Burkholderia_sp_2385</i>                   | 21 | 21 | 0.06 | 0.06 | 0.02365 N |
| Bacteria | <i>Atopobium_vaginae_DSM_15829</i>            | 52 | 51 | 0.05 | 0.04 | 0.02356 N |
| Bacteria | <i>Prevotella_timonensis_4401737_DSM_228</i>  | 54 | 53 | 0.04 | 0.05 | 0.02293 N |
| Bacteria | <i>Dialister_micraerophilus_DSM_19965</i>     | 19 | 19 | 0.06 | 0.06 | 0.02283 N |
| Bacteria | <i>Gemella_sanguinis_M325</i>                 | 29 | 24 | 0.05 | 0.04 | 0.02242 N |
| Bacteria | <i>Delftia_sp_670</i>                         | 39 | 29 | 0.05 | 0.12 | 0.02239 N |
| Bacteria | <i>Leuconostoc_5987 Branch</i>                | 40 | 40 | 0.04 | 0.05 | 0.02191 N |
| Bacteria | <i>Peptoniphilus_lacrimalis_DSM_7455</i>      | 11 | 11 | 0.07 | 0.05 | 0.02152 N |
| Bacteria | <i>Propionibacterium_20926 Branch</i>         | 17 | 17 | 0.03 | 0.04 | 0.02123 N |
| Bacteria | <i>Pseudomonas_syringae_pv_pisi_str_PP1</i>   | 58 | 10 | 0.03 | 0.02 | 0.02095 N |
| Bacteria | <i>Achromobacter_xylooxidans_X02736</i>       | 67 | 62 | 0.04 | 0.05 | 0.0203 N  |
| Bacteria | <i>Corynebacterium_aurimucosum_ATCC_70</i>    | 61 | 59 | 0.03 | 0.03 | 0.01792 N |
| Bacteria | <i>Rothia_mucilaginoso_M508</i>               | 38 | 38 | 0.04 | 0.09 | 0.01768 N |
| Bacteria | <i>Staphylococcus_cohnii_hu_01</i>            | 12 | 10 | 0.05 | 0.05 | 0.01741 N |
| Bacteria | <i>Dermacoccus_20818 Branch</i>               | 41 | 41 | 0.03 | 0.03 | 0.01593 N |
| Bacteria | <i>Ruminococcus_flavofaciens_MA2007</i>       | 63 | 57 | 0.03 | 0.03 | 0.01685 N |
| Bacteria | <i>Facklamia_hominis_CCUG_36813</i>           | 18 | 18 | 0.04 | 0.07 | 0.01616 N |

Sample 15 cont.

|          |                                         |    |    |      |      |           |
|----------|-----------------------------------------|----|----|------|------|-----------|
| Bacteria | Ochrobactrum_anthropi_22533 Branch      | 14 | 14 | 0.04 | 0.02 | 0.01572 N |
| Bacteria | Gemella_haemolysans_ATCC_10379          | 29 | 29 | 0.03 | 0.03 | 0.01462 N |
| Bacteria | Anaerococcus_vaginalis_ATCC_51170       | 14 | 14 | 0.04 | 0.03 | 0.01455 N |
| Bacteria | Anaerococcus_prevotii_DSM_20548         | 28 | 26 | 0.03 | 0.03 | 0.01433 N |
| Bacteria | Staphylococcus_warneri_6227 Branch      | 20 | 20 | 0.03 | 0.04 | 0.01427 N |
| Bacteria | Actinomyces_sp_oral_taxon_448_str_F04C  | 45 | 45 | 0.03 | 0.03 | 0.01369 N |
| Bacteria | Porphyromonas_bennonis_DSM_23058_JC     | 40 | 35 | 0.03 | 0.03 | 0.01342 N |
| Bacteria | Mycobacterium_abscessus_MAB_082312_     | 50 | 50 | 0.03 | 0.03 | 0.01307 N |
| Bacteria | Peptoniphilus_sp_oral_taxon_375_str_F04 | 24 | 24 | 0.03 | 0.03 | 0.01306 N |
| Bacteria | Microbacterium_laevaniformans_OR221     | 34 | 30 | 0.03 | 0.03 | 0.0127 N  |

|       |                                   |    |    |      |      |         |
|-------|-----------------------------------|----|----|------|------|---------|
| Virus | Propionibacterium_phage_PHL111M01 | 46 | 38 | 1.06 | 0.96 | 76.06 Y |
| Virus | Human_adenovirus_313 Branch       | 34 | 17 | 0.55 | 0.55 | 11.96 N |
| Virus | Staphylococcus_phage_StB20        | 48 | 48 | 0.23 | 0.23 | 4.589 N |
| Virus | Lactococcus_phage_ul36            | 26 | 26 | 0.22 | 0.21 | 3.817 N |
| Virus | Streptococcus_phage_DT1           | 18 | 17 | 0.23 | 0.25 | 3.576 N |

|       |                               |     |     |      |      |       |
|-------|-------------------------------|-----|-----|------|------|-------|
| Fungi | Malassezia_restricta_CBS_7877 | 414 | 401 | 0.61 | 0.61 | 100 N |
|-------|-------------------------------|-----|-----|------|------|-------|

Protist no calls detected above threshold

|                       |                            |     |     |       |       |   |
|-----------------------|----------------------------|-----|-----|-------|-------|---|
| Antibiotic Resistance | Macrolide_vgaA_2099 Branch | 167 | 118 | 13.63 | 13.63 | N |
| Antibiotic Resistance | MDR-Efflux-pump_mexC       | 23  | 23  | 7.72  | 7.72  | N |
| Antibiotic Resistance | Macrolide_ermX             | 78  | 40  | 7.11  | 7.11  | N |
| Antibiotic Resistance | Macrolide_ermC             | 50  | 50  | 5.59  | 5.59  | N |

Sample 15 cont.

|                  |                                      |    |    |       |       |   |
|------------------|--------------------------------------|----|----|-------|-------|---|
| Virulence Factor | Staphylococcus_aureus_GI_1527 Branch | 45 | 33 | 30.27 | 30.27 | N |
| Virulence Factor | Staphylococcus_lentus_GENE_repL      | 55 | 55 | 25.46 | 25.46 | N |
| Virulence Factor | Pseudomonas_aeruginosa_GENE_pilN     | 33 | 33 | 21.29 | 21.29 | N |
| Virulence Factor | Pseudomonas_aeruginosa_GeneID_PA007  | 59 | 30 | 18.07 | 18.07 | N |
| Virulence Factor | Enterobacter_aerogenes_GENE_trbP     | 36 | 36 | 17.91 | 17.91 | N |
| Virulence Factor | Pseudomonas_aeruginosa_GeneID_PA008  | 87 | 87 | 17.83 | 17.83 | N |
| Virulence Factor | Staphylococcus_aureus_GI_33390940    | 65 | 65 | 15.37 | 15.37 | N |
| Virulence Factor | Staphylococcus_lentus_GENE_ermC      | 50 | 50 | 15.02 | 15.02 | N |
| Virulence Factor | Pseudomonas_aeruginosa_GENE_fliC     | 40 | 40 | 12.58 | 12.58 | N |
| Virulence Factor | Pseudomonas_aeruginosa_GENE_lasA     | 33 | 33 | 10.78 | 10.78 | N |
| Virulence Factor | Enterobacter_aerogenes_GENE_trbG     | 24 | 24 | 10.62 | 10.62 | N |
| Virulence Factor | Pseudomonas_aeruginosa_GENE_clpV1    | 39 | 39 | 9.92  | 9.92  | N |
| Virulence Factor | Pseudomonas_aeruginosa_GENE_flgL     | 24 | 24 | 5.75  | 5.75  | N |
| Virulence Factor | Bacteroides_fragilis_GENE_rteA       | 49 | 49 | 5.45  | 5.45  | N |

Microbial DNA free water.

| Database | Organism                                              | Unique Matches<br>Frequency | Unique<br>Matches | % Unique<br>Matches | % Total<br>Matches | Relative<br>Abundance | Above_Threshold |
|----------|-------------------------------------------------------|-----------------------------|-------------------|---------------------|--------------------|-----------------------|-----------------|
| Bacteria | <i>Bacteroides_vulgatus</i> _ATCC_8482                | 235163                      | 7376              | 25.6                | 31.46              | 15.94                 | Y               |
| Bacteria | <i>Bacteroides_sp_3_1_40A</i>                         | 41098                       | 2899              | 19.66               | 13.93              | 7.813                 | Y               |
| Bacteria | <i>Bacteroides_uniformis</i> _ATCC_8492               | 98060                       | 6915              | 31.12               | 82.63              | 4.519                 | Y               |
| Bacteria | <i>Faecalibacterium_cf_prausnitzii</i> _KLE1255       | 1874026                     | 105177            | 58.68               | 59.77              | 6.71                  | Y               |
| Bacteria | <i>Bacteroides_eggerthii</i> _DSM_20697               | 688558                      | 24260             | 34.66               | 73.53              | 5.578                 | Y               |
| Bacteria | <i>Ruminococcus_bicirculans</i>                       | 1585034                     | 73047             | 42.6                | 42.62              | 5.409                 | Y               |
| Bacteria | <i>Faecalibacterium_prausnitzii</i> _M21_2            | 607678                      | 23492             | 24.61               | 46.19              | 3.97                  | Y               |
| Bacteria | <i>Alistipes_putredinis</i> _DSM_17216                | 893803                      | 118128            | 68.13               | 68.13              | 3.782                 | Y               |
| Bacteria | <i>Bacteroides_dorei_isolate_HS1_L_1_B_010</i>        | 102321                      | 3152              | 9.27                | 16.03              | 1.667                 | Y               |
| Bacteria | <i>Ruminococcus_bromii</i> _L2_63                     | 466391                      | 79375             | 55.39               | 55.38              | 2.521                 | Y               |
| Bacteria | <i>Bacteroides_massiliensis</i> _B84634_Timone_84634_ | 267530                      | 120570            | 61.24               | 61.49              | 1.811                 | Y               |
| Bacteria | <i>Phascolarctobacterium_sp_CAG_207</i>               | 285291                      | 102999            | 67.05               | 67.05              | 2.072                 | Y               |
| Bacteria | <i>Parabacteroides_sp_D25</i>                         | 121                         | 28                | 14.07               | 46.07              | 1.347                 | Y               |
| Bacteria | <i>Parabacteroides_distasonis_str_3776_D15_i_1025</i> | 977                         | 142               | 16.63               | 3.87               | 1.732                 | Y               |
| Bacteria | <i>Bacteroides_clarus</i> _YIT_12056                  | 277396                      | 112295            | 57.04               | 57.04              | 1.724                 | Y               |
| Bacteria | <i>Alistipes_onderdonkii</i> _WAL_8169_DSM_19147      | 193207                      | 21370             | 26.45               | 42.78              | 1.654                 | Y               |
| Bacteria | <i>Ruminococcus_sp_5_1_39BFAA</i>                     | 49367                       | 22877             | 30.44               | 33.5               | 1.606                 | Y               |
| Bacteria | <i>Blautia_wexlerae</i> _DSM_19850                    | 48992                       | 23434             | 25.89               | 28.03              | 1.507                 | Y               |
| Bacteria | <i>Bacteroidales_bacterium_ph8</i>                    | 213018                      | 94828             | 52.26               | 51.19              | 1.439                 | Y               |
| Bacteria | <i>Bacteroides_ovatus</i> _CL03T12C18                 | 31099                       | 15812             | 25.14               | 29.64              | 1.215                 | Y               |
| Bacteria | <i>Bifidobacterium_stercoris</i> _21370 Branch        | 1613                        | 960               | 3.1                 | 3.1                | 1.192                 | Y               |
| Bacteria | <i>Oscillibacter_sp_ER4</i>                           | 197475                      | 66281             | 38.46               | 37.91              | 1.162                 | Y               |
| Bacteria | <i>Porphyromonas_sp_31_2</i>                          | 8271                        | 2278              | 11.62               | 37.9               | 0.8415                | Y               |
| Bacteria | <i>Roseburia_inulinivorans</i> _DSM_16841             | 142984                      | 71436             | 40.53               | 40.55              | 1.061                 | Y               |
| Bacteria | <i>Ruminococcus_obeum</i> _ATCC_29174                 | 114486                      | 68370             | 41.74               | 41.74              | 1.049                 | Y               |
| Bacteria | <i>Eubacterium_hallii</i> _DSM_3353                   | 101122                      | 60009             | 39.91               | 39.9               | 0.9729                | Y               |
| Bacteria | <i>Alistipes_sp_AL_1</i>                              | 165901                      | 13182             | 14.7                | 38.29              | 0.9636                | Y               |
| Bacteria | <i>Bifidobacterium_adolescentis_strain_BBMN23</i>     | 5318                        | 2875              | 11.32               | 16.95              | 0.8801                | Y               |
| Bacteria | <i>Bacteroides_salyersiae</i> _CL02T12C01             | 53332                       | 23770             | 30.74               | 60.81              | 0.8528                | Y               |
| Bacteria | <i>Bacteroides_thetaiotaomicron</i> _VPI_5482         | 35092                       | 10485             | 21.8                | 57.34              | 0.8223                | Y               |
| Bacteria | <i>Bacteroides_xylanisolvens</i> _CL03T12C04          | 20541                       | 11137             | 13.38               | 14.4               | 0.7779                | Y               |

## Microbial DNA free water.cont.

|          |                                          |       |       |       |       |        |   |
|----------|------------------------------------------|-------|-------|-------|-------|--------|---|
| Bacteria | Parabacteroides_merdae_CL03T12C32        | 34118 | 17131 | 14.3  | 23.36 | 0.7802 | Y |
| Bacteria | Candidatus_Bacteroides_timonensis_AP1    | 58693 | 24283 | 12.35 | 12.76 | 0.7533 | Y |
| Bacteria | Bacteroides_fragilis_str_3725_D9_ii      | 128   | 46    | 6.57  | 30.03 | 0.3302 | Y |
| Bacteria | Eubacterium_eligens_ATCC_27750           | 72875 | 35699 | 27.51 | 27.57 | 0.6791 | Y |
| Bacteria | Lachnospiraceae_bacterium_5_1_63FAA      | 5178  | 3841  | 12.02 | 14.84 | 0.6669 | Y |
| Bacteria | Bacteroides_sartorii_JCM_16497           | 12473 | 1154  | 1.05  | 1.84  | 0.3916 | Y |
| Bacteria | butyrate_producing_bacterium_SSC_2       | 247   | 204   | 3.36  | 3.85  | 0.6094 | Y |
| Bacteria | Bacteroides_cellulosilyticus_CL02T12C19  | 32150 | 12440 | 11.92 | 14.25 | 0.601  | Y |
| Bacteria | Eubacterium_biforme_DSM_3989             | 50302 | 30397 | 25.31 | 25.31 | 0.5764 | Y |
| Bacteria | Alistipes_shahii_WAL_8301                | 63885 | 38643 | 20.79 | 20.45 | 0.5418 | Y |
| Bacteria | Catenibacterium_mitsuokai_DSM_15897      | 62975 | 25800 | 19.59 | 19.59 | 0.5076 | Y |
| Bacteria | Anaerostipes_hadrus_DSM_3319             | 2286  | 1651  | 6.2   | 9.47  | 0.471  | Y |
| Bacteria | Collinsella_sp_4_8_47FAA                 | 23874 | 16006 | 12.69 | 12.69 | 0.4395 | Y |
| Bacteria | Collinsella_aerofaciens_ATCC_25986       | 23311 | 15673 | 11.45 | 11.45 | 0.4095 | Y |
| Bacteria | Dorea_longicatena_AGR2136                | 34572 | 25357 | 16.89 | 16.92 | 0.4059 | Y |
| Bacteria | Dorea_formicigenerans_ATCC_27755         | 8810  | 6052  | 8.84  | 8.83  | 0.3743 | Y |
| Bacteria | Bifidobacterium_sp_12_1_47BFAA           | 87    | 78    | 1.04  | 1.04  | 0.362  | Y |
| Bacteria | Bilophila_wadsworthia_ATCC_49260         | 19977 | 12527 | 13.26 | 37.62 | 0.3558 | Y |
| Bacteria | Bifidobacterium_longum_subsp_longum_7_1B | 190   | 165   | 6.49  | 8.18  | 0.3165 | Y |
| Bacteria | Butyricimonas_virosa_DSM_23226           | 51881 | 23970 | 12.17 | 12.4  | 0.2975 | Y |
| Bacteria | Oscillospiraceae_bacterium_VE202_24      | 12840 | 9432  | 12.97 | 30.35 | 0.2816 | Y |
| Bacteria | Blautia_sp_KLE_1732                      | 7940  | 5228  | 6.65  | 6.64  | 0.2798 | Y |
| Bacteria | Clostridium_sp_SS2_1                     | 508   | 381   | 6.01  | 16.19 | 0.2592 | Y |
| Bacteria | Roseburia_intestinalis_XB6B4             | 9220  | 4753  | 8.77  | 17.85 | 0.2524 | Y |
| Bacteria | Subdoligranulum_sp_4_3_54A2FAA           | 26803 | 23384 | 11.89 | 11.89 | 0.2393 | Y |
| Bacteria | Enterococcus_faecium_4290 Branch         | 590   | 478   | 19.1  | 18.72 | 0.2387 | Y |
| Bacteria | Roseburia_hominis_A2_183                 | 26436 | 20407 | 10.38 | 10.38 | 0.2287 | Y |
| Bacteria | Clostridiales_bacterium_VE202_14         | 20446 | 18677 | 10.31 | 10.31 | 0.2002 | Y |
| Bacteria | Peptoclostridium_difficile_Y358          | 643   | 103   | 14.17 | 12.05 | 0.1473 | Y |
| Bacteria | Dorea_sp_AGR2135                         | 2581  | 1649  | 3.28  | 6.1   | 0.1438 | Y |
| Bacteria | Coprococcus_catus_GD_7                   | 15172 | 12707 | 7.41  | 7.41  | 0.1423 | Y |
| Bacteria | Bilophila_sp_4_1_30                      | 13601 | 8926  | 5.82  | 29.13 | 0.1322 | Y |
| Bacteria | Bacteroides_stercorisoris_JCM_17103      | 19541 | 7800  | 3.96  | 5.58  | 0.132  | Y |

## Microbial DNA free water.cont.

|          |                                                    |       |       |      |       |         |   |
|----------|----------------------------------------------------|-------|-------|------|-------|---------|---|
| Bacteria | <i>Intestinimonas_butyriciproducens</i>            | 13697 | 12594 | 6.4  | 6.74  | 0.1248  | Y |
| Bacteria | <i>Christensenella_timonensis_Marseille_P2437</i>  | 38853 | 2144  | 1.19 | 1.32  | 0.1202  | Y |
| Bacteria | <i>Bacteroides_intestinalis_DSM_17393</i>          | 10947 | 4190  | 2.13 | 3.89  | 0.1143  | Y |
| Bacteria | <i>Flavonifractor_plautii_ATCC_29863</i>           | 3023  | 2458  | 4.65 | 26.84 | 0.1097  | Y |
| Bacteria | <i>Bifidobacterium_pseudocatenulatum_IPLA36007</i> | 2776  | 2322  | 5.68 | 9.03  | 0.1096  | Y |
| Bacteria | Acidaminococcus_14354 Branch                       | 15    | 13    | 3.78 | 5.4   | 0.09331 | Y |
| Bacteria | <i>Bacteroides_rodentium_JCM_16496</i>             | 11631 | 2577  | 1.31 | 20.87 | 0.06034 | Y |
| Bacteria | <i>Haemophilus_parainfluenzae_T3T1</i>             | 2730  | 2418  | 2.91 | 2.94  | 0.08172 | Y |
| Bacteria | <i>Tyzzera_nexilis_DSM_1787</i>                    | 23318 | 2446  | 1.59 | 1.69  | 0.07346 | Y |
| Bacteria | <i>Eubacterium_ventriosum_ATCC_27560</i>           | 5895  | 4900  | 3.75 | 3.86  | 0.06474 | Y |
| Bacteria | Parabacteroides_1355 Branch                        | 2485  | 2283  | 1.35 | 2.31  | 0.0647  | Y |
| Bacteria | <i>Clostridium_orbiscindens_1_3_50AFAA</i>         | 1718  | 1345  | 2.73 | 26.76 | 0.06178 | Y |
| Bacteria | <i>Blautia_hydrogenotrophica_DSM_10507</i>         | 6675  | 6275  | 3.37 | 3.37  | 0.05787 | Y |
| Bacteria | <i>Bifidobacterium_ruminantium</i>                 | 106   | 52    | 4.06 | 0.39  | 0.0565  | Y |
| Bacteria | Acidaminococcus_sp_BV3L6                           | 773   | 609   | 2.37 | 5.02  | 0.05162 | Y |
| Bacteria | <i>Clostridium_clostridioforme_90A7</i>            | 1212  | 1140  | 1.36 | 2.43  | 0.04182 | Y |
| Bacteria | <i>Prevotella_bivia_DNF00650</i>                   | 2357  | 71    | 0.5  | 0.07  | 0.04551 | Y |
| Bacteria | <i>Bacteroides_oleiciplenus_YIT_12058</i>          | 7835  | 2950  | 1.5  | 2.26  | 0.044   | Y |
| Bacteria | <i>Bacteroides_caccae_CL03T12C61</i>               | 5230  | 1607  | 2.55 | 3.62  | 0.04371 | Y |
| Bacteria | <i>Intestinibacter_bartlettii_DSM_16795</i>        | 1455  | 1342  | 2.07 | 2.07  | 0.04104 | Y |
| Bacteria | <i>Clostridium_bolteae_90A9</i>                    | 1020  | 326   | 3.92 | 2.35  | 0.03737 | Y |
| Bacteria | <i>Bifidobacterium_catenulatum_DSM_16992_JCM_1</i> | 1663  | 948   | 1.24 | 1.24  | 0.03905 | Y |
| Bacteria | Clostridiales_Order_18_2469_26631 Branch           | 681   | 224   | 0.17 | 0.18  | 0.01398 | Y |
| Bacteria | <i>Eubacterium_rectale_DSM_17629</i>               | 5893  | 1387  | 2.79 | 3.22  | 0.03834 | Y |
| Bacteria | <i>Prevotella_sp_P4_76</i>                         | 3759  | 99    | 0.35 | 0.19  | 0.03824 | Y |
| Bacteria | <i>Clostridium_citroniae_WAL_17108</i>             | 4559  | 4357  | 2.21 | 2.25  | 0.03747 | Y |
| Bacteria | <i>Bacteroides_stercoris_ATCC_43183</i>            | 7183  | 1211  | 1.54 | 1.32  | 0.03589 | Y |
| Bacteria | <i>Prevotella_tanneriae_ATCC_51259</i>             | 15915 | 570   | 0.35 | 0.35  | 0.03579 | Y |
| Bacteria | <i>Senegalimassilia_anaerobia_JC110</i>            | 3771  | 3549  | 2.22 | 2.22  | 0.03573 | Y |
| Bacteria | <i>Christensenella_minuta_DSM22607</i>             | 15506 | 1025  | 0.55 | 0.68  | 0.03378 | Y |
| Bacteria | <i>Ruminococcus_gnavus_ATCC_29149</i>              | 1035  | 626   | 1.68 | 1.69  | 0.02982 | Y |
| Bacteria | <i>Alistipes_finegoldii_DSM_17242</i>              | 5628  | 791   | 0.92 | 0.69  | 0.02962 | Y |
| Bacteria | <i>Butyrivibrio_crossotus_DSM_2876</i>             | 5370  | 1429  | 1.04 | 1.23  | 0.02605 | Y |

## Microbial DNA free water.cont.

|          |                                             |       |      |      |       |          |   |
|----------|---------------------------------------------|-------|------|------|-------|----------|---|
| Bacteria | Anaerotruncus_colihominis_DSM_17241         | 3605  | 1091 | 1.86 | 1.39  | 0.02567  | Y |
| Bacteria | Streptococcus_sp_I_P16                      | 629   | 604  | 1.5  | 2.36  | 0.02524  | Y |
| Bacteria | Parabacteroides_goldsteinii_CL02T12C30      | 2568  | 1993 | 1.32 | 2.35  | 0.02522  | Y |
| Bacteria | Ruminococcus_albus_8                        | 13513 | 511  | 0.26 | 0.26  | 0.02474  | Y |
| Bacteria | Ruminococcus_torques_L2_14                  | 4194  | 1870 | 1.29 | 1.29  | 0.02441  | Y |
| Bacteria | Alistipes_timonensis_JC136                  | 9209  | 1415 | 0.74 | 0.74  | 0.02414  | Y |
| Bacteria | Bacteroides_finegoldii_DSM_17565            | 6354  | 1279 | 0.82 | 0.6   | 0.02223  | Y |
| Bacteria | Alistipes_senegalensis_JC50                 | 7920  | 1374 | 0.7  | 0.71  | 0.02103  | Y |
| Bacteria | Eubacterium_sp_3_1_31                       | 2382  | 1186 | 1.5  | 1.51  | 0.0191   | Y |
| Bacteria | Subdoligranulum_variabile_DSM_15176         | 5209  | 1784 | 0.91 | 0.92  | 0.01909  | Y |
| Bacteria | Clostridium_asparagiforme_DSM_15981         | 1742  | 1564 | 1.01 | 1.72  | 0.01883  | Y |
| Bacteria | Parabacteroides_johnsonii_DSM_18315         | 4332  | 1635 | 1.77 | 15.65 | 0.01879  | Y |
| Bacteria | Holdemania_massiliensis_AP2                 | 2182  | 2103 | 1.23 | 1.23  | 0.01867  | Y |
| Bacteria | Barnesiella_viscericola_DSM_18177           | 9382  | 661  | 0.34 | 0.35  | 0.01853  | Y |
| Bacteria | Ruminococcus_lactaris_CC59_002D             | 876   | 407  | 1.05 | 0.52  | 0.01851  | Y |
| Bacteria | Bacteroides_faecis_MAJ27                    | 5298  | 1651 | 0.84 | 8.45  | 0.01833  | Y |
| Bacteria | Ruminococcaceae_bacterium_D16               | 5601  | 1404 | 0.75 | 0.78  | 0.01804  | Y |
| Bacteria | Ruminococcus_flavefaciens_FD_1              | 9024  | 503  | 0.26 | 0.26  | 0.01682  | Y |
| Bacteria | Pseudoflavonifractor_capillosus_ATCC_29799  | 2803  | 2021 | 1.03 | 1.03  | 0.01659  | Y |
| Bacteria | Pseudomonas_aeruginosa_38657 Branch         | 16    | 16   | 2.66 | 2.66  | 0.01506  | Y |
| Bacteria | Bacteroides_acidifaciens_JCM_10556          | 7439  | 629  | 0.32 | 0.38  | 0.01498  | Y |
| Bacteria | Coprococcus_comes_ATCC_27758                | 2946  | 1237 | 0.76 | 0.8   | 0.014    | N |
| Bacteria | Bacteroides_coprocola_DSM_17136             | 7209  | 486  | 0.25 | 0.26  | 0.01368  | N |
| Bacteria | Clostridium_cf_saccharolyticum_K10          | 2141  | 893  | 1.5  | 0.53  | 0.01366  | N |
| Bacteria | Ruminococcus_champanellensis_18P13_JCM_1704 | 3447  | 1204 | 0.67 | 0.67  | 0.01321  | N |
| Bacteria | Prevotella_988 Branch                       | 833   | 28   | 0.03 | 0.02  | 0.01185  | N |
| Bacteria | Bacteroides_pectinophilus_ATCC_43243        | 3385  | 880  | 0.58 | 0.75  | 0.01289  | N |
| Bacteria | Eubacterium_ramulus_ATCC_29099              | 3661  | 1040 | 0.58 | 0.6   | 0.0126   | N |
| Bacteria | Clostridium_hathewayi_DSM_13479             | 2176  | 1512 | 0.77 | 0.93  | 0.01208  | N |
| Bacteria | Erysipelotrichaceae_bacterium_6_1_45        | 2630  | 333  | 1.02 | 0.97  | 0.01188  | N |
| Bacteria | Kandleria_vitulina_42625 Branch             | 81    | 27   | 0.04 | 0.04  | 0.008502 | N |
| Bacteria | Bacteroides_barnesiae_DSM_18169_JCM_13652   | 6168  | 404  | 0.2  | 0.22  | 0.01133  | N |
| Bacteria | Bacteroides_nordii_WAL_11050_JCM_12987      | 2721  | 172  | 0.22 | 0.48  | 0.01107  | N |



Microbial DNA free water.cont.

|          |                                             |      |      |      |      |          |   |
|----------|---------------------------------------------|------|------|------|------|----------|---|
| Bacteria | Eubacterium_desmolans_ATCC_43058            | 2559 | 1174 | 0.62 | 0.62 | 0.01091  | N |
| Bacteria | Eubacterium_siraeum_V10Sc8a                 | 1798 | 473  | 0.53 | 0.54 | 0.01076  | N |
| Bacteria | Bacteroides_plebeius_DSM_17135              | 4698 | 678  | 0.34 | 0.34 | 0.01074  | N |
| Bacteria | Veillonella_sp_oral_taxon_158_str_F0412     | 979  | 955  | 0.74 | 0.87 | 0.01002  | N |
| Bacteria | Fusobacterium_varium_ATCC_27725             | 789  | 770  | 0.77 | 0.76 | 0.01001  | N |
| Bacteria | Bacteroides_gallinarum_DSM_18171_JCM_13658  | 3956 | 729  | 0.37 | 0.37 | 0.009873 | N |
| Bacteria | Blautia_hansenii_DSM_20583                  | 1012 | 228  | 0.5  | 0.3  | 0.009766 | N |
| Bacteria | Clostridium_symbiosum_WAL_14673             | 462  | 179  | 0.69 | 0.61 | 0.009703 | N |
| Bacteria | Streptococcus_salivarius_M18                | 235  | 227  | 0.89 | 1.69 | 0.009547 | N |
| Bacteria | Prevotella_copri_DSM_18205                  | 5357 | 210  | 0.11 | 0.12 | 0.009064 | N |
| Bacteria | Citrobacter_freundii_UCI_32                 | 565  | 561  | 0.72 | 0.85 | 0.008937 | N |
| Bacteria | Veillonella_dispar_ATCC_17748               | 823  | 802  | 0.64 | 0.78 | 0.008462 | N |
| Bacteria | Prevotella_stercorea_DSM_18206              | 4981 | 257  | 0.13 | 0.14 | 0.008448 | N |
| Bacteria | Bacteroides_coprophilus_DSM_18228_JCM_13818 | 4809 | 259  | 0.13 | 0.13 | 0.008196 | N |
| Bacteria | Odoribacter_splanchnicus_DSM_20712          | 4904 | 214  | 0.11 | 0.11 | 0.008071 | N |
| Bacteria | Eubacterium_dolichum_DSM_3991               | 1210 | 598  | 0.51 | 0.51 | 0.007845 | N |
| Bacteria | Coprobacillus_sp_8_2_54BFAA                 | 462  | 80   | 0.39 | 0.38 | 0.007708 | N |
| Bacteria | Odoribacter_laneus_YIT_12061                | 3989 | 242  | 0.12 | 0.12 | 0.006918 | N |
| Bacteria | Rikenella_microfusus_DSM_15922              | 3169 | 396  | 0.22 | 0.23 | 0.006913 | N |
| Bacteria | Clostridium_innocuum                        | 1273 | 146  | 0.23 | 0.23 | 0.006824 | N |
| Bacteria | Anaerofustis_stercorihominis_DSM_17244      | 635  | 631  | 0.54 | 0.54 | 0.006772 | N |
| Bacteria | Streptococcus_agalactiae_MRI_Z1_039         | 25   | 25   | 1.37 | 1.11 | 0.006715 | N |
| Bacteria | Bacteroides_salanitronis_DSM_18170          | 3409 | 330  | 0.17 | 0.17 | 0.006449 | N |
| Bacteria | Blautia_producta                            | 1041 | 815  | 0.41 | 0.43 | 0.005774 | N |
| Bacteria | Tannerella_sp_6_1_58FAA_CT1                 | 1045 | 220  | 0.28 | 0.29 | 0.005726 | N |
| Bacteria | Klebsiella_pneumoniae_MGH_34763 Branch      | 21   | 21   | 0.9  | 1.4  | 0.005534 | N |
| Bacteria | Clostridium_methylpentosum_DSM_5476         | 922  | 774  | 0.39 | 0.39 | 0.005344 | N |
| Bacteria | Prevotella_disiens_DNF00882                 | 868  | 30   | 0.08 | 0.08 | 0.005122 | N |
| Bacteria | Paraprevotella_xylaniphila_YIT_11841        | 2578 | 313  | 0.16 | 0.14 | 0.005066 | N |
| Bacteria | Parabacteroides_gordonii_DSM_23371          | 2073 | 433  | 0.22 | 0.39 | 0.005024 | N |
| Bacteria | Clostridium_butyricum_27022 Branch          | 22   | 16   | 0.04 | 0.04 | 0.003547 | N |
| Bacteria | Bacteroides_paurosaccharolyticus_JCM_15092  | 1347 | 436  | 0.26 | 0.26 | 0.004647 | N |
| Bacteria | Propionibacterium_20956 Branch              | 18   | 18   | 0.15 | 0.12 | 0.004189 | N |

## Microbial DNA free water.cont.

|          |                                                      |      |     |      |      |          |   |
|----------|------------------------------------------------------|------|-----|------|------|----------|---|
| Bacteria | <i>Butyricoccus_pullicaecorum_1_2</i>                | 959  | 575 | 0.29 | 0.3  | 0.004206 | N |
| Bacteria | <i>Bifidobacterium_kashiwanohense_PV20_2</i>         | 467  | 399 | 0.34 | 0.42 | 0.004184 | N |
| Bacteria | <i>Bifidobacterium_bifidum_21470</i> Branch          | 17   | 14  | 0.02 | 0.02 | 0.001683 | N |
| Bacteria | <i>Catonella_morbi_ATCC_51271</i>                    | 896  | 374 | 0.24 | 0.24 | 0.00374  | N |
| Bacteria | <i>Coprococcus_sp_ART55_1</i>                        | 738  | 352 | 0.25 | 0.27 | 0.00355  | N |
| Bacteria | <i>Streptococcus_parasanguinis</i>                   | 136  | 132 | 0.37 | 0.53 | 0.003546 | N |
| Bacteria | <i>Actinomyces_sp_ICM47</i>                          | 505  | 495 | 0.29 | 0.29 | 0.003522 | N |
| Bacteria | <i>Firmicutes_bacterium_ASF500</i>                   | 594  | 434 | 0.24 | 0.24 | 0.003077 | N |
| Bacteria | <i>Alloprevotella_rava_F0323</i>                     | 1853 | 70  | 0.04 | 0.04 | 0.003071 | N |
| Bacteria | <i>Bifidobacterium_angulatum_21376</i> Branch        | 441  | 278 | 0.19 | 0.19 | 0.002949 | N |
| Bacteria | <i>Bacteroides_pyogenes_JCM_10003</i>                | 200  | 64  | 0.22 | 0.14 | 0.002873 | N |
| Bacteria | <i>bacterium_LF_3</i>                                | 479  | 250 | 0.21 | 0.21 | 0.002833 | N |
| Bacteria | <i>Streptococcus_australis_ATCC_700641</i>           | 213  | 210 | 0.26 | 0.3  | 0.002762 | N |
| Bacteria | <i>Bacteroides_faecichinchillae_JCM_17102</i>        | 1326 | 217 | 0.11 | 0.19 | 0.002661 | N |
| Bacteria | <i>Lactobacillus_ruminis_ATCC_25644</i>              | 332  | 50  | 0.13 | 0.09 | 0.002595 | N |
| Bacteria | <i>Hallella_seregens_ATCC_51272</i>                  | 768  | 29  | 0.04 | 0.02 | 0.002427 | N |
| Bacteria | <i>Streptococcus_suis_EA1832_92</i>                  | 501  | 198 | 0.17 | 0.17 | 0.002401 | N |
| Bacteria | <i>Bacteroides_fluxus_YIT_12057</i>                  | 1001 | 247 | 0.13 | 0.41 | 0.002374 | N |
| Bacteria | <i>Clostridium_scindens_ATCC_35704</i>               | 150  | 96  | 0.22 | 0.19 | 0.002235 | N |
| Bacteria | <i>Faecalitalea_cylindroides_ATCC_27803</i>          | 175  | 101 | 0.19 | 0.13 | 0.002105 | N |
| Bacteria | <i>Sharpea_azabuensis_DSM_18934</i>                  | 647  | 153 | 0.12 | 0.12 | 0.002095 | N |
| Bacteria | <i>Lachnospira_multipara_ATCC_19207</i>              | 639  | 148 | 0.11 | 0.26 | 0.002063 | N |
| Bacteria | <i>Clostridium_celatum_DSM_1785</i>                  | 302  | 208 | 0.18 | 0.47 | 0.00206  | N |
| Bacteria | <i>Bacteroides_helcogenes_P_36_108</i>               | 1050 | 172 | 0.09 | 0.09 | 0.002031 | N |
| Bacteria | <i>Kluyvera_ascorbata_ATCC_33433</i>                 | 346  | 340 | 0.17 | 0.17 | 0.001987 | N |
| Bacteria | <i>Coprococcus_eutactus_ATCC_27759</i>               | 706  | 144 | 0.1  | 0.15 | 0.001907 | N |
| Bacteria | <i>Haemophilus_haemolyticus_HK386</i>                | 95   | 75  | 0.19 | 0.17 | 0.001716 | N |
| Bacteria | <i>Cellulomonas_carbonis_T26</i>                     | 811  | 124 | 0.07 | 0.07 | 0.001707 | N |
| Bacteria | <i>Marvinbryantia_formatexigens_DSM_14469</i>        | 531  | 225 | 0.12 | 0.12 | 0.001621 | N |
| Bacteria | <i>Holdemania_filiformis_DSM_12042</i>               | 494  | 199 | 0.11 | 0.11 | 0.001583 | N |
| Bacteria | <i>Clostridium_saccharolyticum_WM1</i>               | 511  | 205 | 0.11 | 0.11 | 0.001514 | N |
| Bacteria | <i>Clostridiales_genomosp_BVAB3_str_27783</i> Branch | 326  | 62  | 0.07 | 0.07 | 0.001403 | N |
| Bacteria | <i>Escherichia_coli_32006</i> Branch                 | 17   | 17  | 0.23 | 0.27 | 0.001471 | N |

## Microbial DNA free water.cont.

|          |                                                       |     |     |      |      |           |   |
|----------|-------------------------------------------------------|-----|-----|------|------|-----------|---|
| Bacteria | <i>Solobacterium_moorei</i> _F0204                    | 145 | 71  | 0.13 | 0.08 | 0.001414  | N |
| Bacteria | <i>Anaerostipes_sp_3_2_56</i> FAA                     | 93  | 85  | 0.15 | 0.16 | 0.001363  | N |
| Bacteria | <i>Clostridium_aminophilum</i> _DSM_10710             | 482 | 182 | 0.09 | 0.09 | 0.001331  | N |
| Bacteria | <i>bacterium_OL_1</i>                                 | 263 | 193 | 0.12 | 0.12 | 0.001312  | N |
| Bacteria | <i>Butyricimonas_synergistica</i> _DSM_23225          | 443 | 182 | 0.09 | 0.41 | 0.001281  | N |
| Bacteria | <i>Anaerotruncus_sp_G32012</i>                        | 406 | 184 | 0.1  | 0.1  | 0.001272  | N |
| Bacteria | <i>Prevotella_melaninogenica</i> _DNF00666            | 285 | 83  | 0.09 | 0.07 | 0.001261  | N |
| Bacteria | <i>Prevotella_bergensis</i> _DSM_17361                | 468 | 171 | 0.09 | 0.09 | 0.001254  | N |
| Bacteria | <i>Oscillibacter_ruminantium</i> _GH1                 | 355 | 198 | 0.1  | 0.12 | 0.001247  | N |
| Bacteria | <i>Eubacterium_limosum</i> _KIST612                   | 228 | 208 | 0.11 | 0.1  | 0.0012    | N |
| Bacteria | <i>Phascolarctobacterium_succinatutens</i> _CAG_287   | 633 | 34  | 0.03 | 0.04 | 0.001187  | N |
| Bacteria | <i>Streptococcus_pleomorphus</i> _DSM_20574           | 268 | 102 | 0.09 | 0.09 | 0.001139  | N |
| Bacteria | <i>Clostridium_leptum</i> _DSM_753                    | 427 | 145 | 0.08 | 0.08 | 0.001126  | N |
| Bacteria | <i>Klebsiella_35336</i> Branch                        | 53  | 51  | 0.08 | 0.08 | 0.001059  | N |
| Bacteria | <i>Johnsonella_ignava</i> _ATCC_51276                 | 217 | 118 | 0.09 | 0.09 | 0.001066  | N |
| Bacteria | <i>Collinsella_stercoris</i> _DSM_13279               | 231 | 154 | 0.09 | 0.09 | 0.001048  | N |
| Bacteria | <i>Enterobacter_28635</i> Branch                      | 78  | 77  | 0.06 | 0.06 | 0.001032  | N |
| Bacteria | <i>Oribacterium_sinus</i> _F0268                      | 156 | 133 | 0.1  | 0.1  | 0.001008  | N |
| Bacteria | <i>Bifidobacterium_breve</i> _HPH0326                 | 26  | 20  | 0.15 | 0.15 | 0.0009668 | N |
| Bacteria | <i>Negativicoccus_succinicivorans</i> _DORA_17_25     | 73  | 66  | 0.11 | 0.11 | 0.0009493 | N |
| Bacteria | <i>Clostridium_perfringens</i> _SM101                 | 42  | 42  | 0.13 | 0.18 | 0.0009484 | N |
| Bacteria | <i>Dialister_succinatiphilus</i> _YIT_11850           | 155 | 133 | 0.09 | 0.09 | 0.0009179 | N |
| Bacteria | <i>Prevotella_multisaccharivorax</i> _DSM_17128       | 712 | 40  | 0.02 | 0.02 | 0.0009034 | N |
| Bacteria | <i>Clostridium_saccharogumia</i> _DSM_17460           | 126 | 88  | 0.09 | 0.09 | 0.0008725 | N |
| Bacteria | <i>Peptostreptococcus_stomatis</i> _DSM_17678         | 99  | 99  | 0.09 | 0.1  | 0.0008692 | N |
| Bacteria | <i>Haemophilus_sputorum</i> _CCUG_13788               | 29  | 28  | 0.13 | 0.26 | 0.000865  | N |
| Bacteria | <i>Porphyromonas_cangingivalis</i> _strain_COT_109_OH | 187 | 13  | 0.03 | 0.03 | 0.0008131 | N |
| Bacteria | <i>Pediococcus_5758</i> Branch                        | 32  | 32  | 0.08 | 0.08 | 0.0007383 | N |
| Bacteria | <i>Shuttleworthia_sp_MSX8B</i>                        | 112 | 44  | 0.07 | 0.05 | 0.0007842 | N |
| Bacteria | <i>Paraprevotella_clara</i> _YIT_11840                | 276 | 123 | 0.06 | 0.06 | 0.0007751 | N |
| Bacteria | <i>Enterococcus_gilvus</i> _ATCC_BAA_350              | 255 | 127 | 0.06 | 0.06 | 0.0007697 | N |
| Bacteria | <i>Clostridium_27666</i> Branch                       | 75  | 37  | 0.05 | 0.05 | 0.0006614 | N |
| Bacteria | <i>Peptostreptococcus_sp_MV1</i>                      | 197 | 56  | 0.06 | 0.06 | 0.0007579 | N |

## Microbial DNA free water.cont.

|          |                                              |     |     |      |      |           |   |
|----------|----------------------------------------------|-----|-----|------|------|-----------|---|
| Bacteria | Selenomonas_bovis_14321 Branch               | 65  | 34  | 0.05 | 0.05 | 0.0005958 | N |
| Bacteria | Enterobacter_cloacae_strain_Ecl1             | 26  | 26  | 0.11 | 0.39 | 0.0007409 | N |
| Bacteria | Prevotella_baroniae_1366 Branch              | 239 | 32  | 0.02 | 0.02 | 0.0006029 | N |
| Bacteria | Prevotella_bryantii_B14                      | 256 | 15  | 0.02 | 0.01 | 0.0007167 | N |
| Bacteria | Veillonella_atypica_ACS_134_V_Col7a          | 34  | 34  | 0.1  | 0.32 | 0.0007072 | N |
| Bacteria | Lactobacillus_5619 Branch                    | 14  | 14  | 0.06 | 0.06 | 0.0006345 | N |
| Bacteria | Haemophilus_pittmaniae_HK_85                 | 99  | 92  | 0.08 | 0.11 | 0.0007025 | N |
| Bacteria | Eggerthella_lenta_1_1_60AFAA                 | 53  | 29  | 0.09 | 0.07 | 0.0007002 | N |
| Bacteria | Megasphaera_sp_14257 Branch                  | 251 | 83  | 0.05 | 0.05 | 0.0006941 | N |
| Bacteria | Butyrivibrio_fibrisolvans_27746 Branch       | 74  | 14  | 0.02 | 0.02 | 0.0005765 | N |
| Bacteria | Citrobacter_sp_30_2                          | 64  | 62  | 0.08 | 0.5  | 0.0006891 | N |
| Bacteria | Eubacterium_sulci_ATCC_35585                 | 77  | 75  | 0.08 | 0.08 | 0.0006872 | N |
| Bacteria | Bacteroidaceae_bacterium_MS4                 | 406 | 67  | 0.03 | 0.03 | 0.0006657 | N |
| Bacteria | Gemella_sanguinis_M325                       | 42  | 42  | 0.09 | 0.11 | 0.0006618 | N |
| Bacteria | Olsenella_sp_oral_taxon_809_str_F0356        | 117 | 104 | 0.07 | 0.07 | 0.0006538 | N |
| Bacteria | Collinsella_intestinalis_DSM_13280           | 156 | 85  | 0.06 | 0.06 | 0.0006454 | N |
| Bacteria | Lachnoanaerobaculum_sp_OBRC5_5               | 63  | 48  | 0.08 | 0.05 | 0.0006428 | N |
| Bacteria | Prevotella_dentasinii_JCM_15908              | 456 | 42  | 0.02 | 0.02 | 0.0006317 | N |
| Bacteria | Atopobium_sp_ICM58                           | 78  | 76  | 0.07 | 0.07 | 0.0006305 | N |
| Bacteria | Oribacterium_27619 Branch                    | 31  | 26  | 0.05 | 0.07 | 0.0005359 | N |
| Bacteria | Bifidobacterium_dentium_21436 Branch         | 21  | 21  | 0.1  | 0.1  | 0.0006263 | N |
| Bacteria | Eubacterium_plexicaudatum_ASF492             | 239 | 100 | 0.05 | 0.05 | 0.0006247 | N |
| Bacteria | Prevotella_corporis_DSM_18810_JCM_8529       | 410 | 33  | 0.02 | 0.02 | 0.0006018 | N |
| Bacteria | Bacteroides_graminisolvans_DSM_19988_JCM_150 | 429 | 48  | 0.02 | 0.03 | 0.0006018 | N |
| Bacteria | Oribacterium_parvum_ACB_27622 Branch         | 106 | 61  | 0.06 | 0.06 | 0.0005937 | N |
| Bacteria | Streptococcus_vestibularis_ATCC_49124        | 20  | 20  | 0.1  | 0.26 | 0.0005876 | N |
| Bacteria | Oscillibacter_valericigenes_Sjm18_20         | 194 | 102 | 0.05 | 0.08 | 0.0005792 | N |
| Bacteria | Bifidobacterium_merycicum_21467 Branch       | 118 | 97  | 0.06 | 0.06 | 0.0005753 | N |
| Bacteria | Prevotella_timonensis_S9_PR14                | 200 | 41  | 0.04 | 0.03 | 0.0005688 | N |
| Bacteria | Gordonibacter_pamelaeae_7_10_1_b             | 124 | 105 | 0.06 | 0.06 | 0.0005659 | N |
| Bacteria | Prevotella_buccalis_ATCC_35310               | 405 | 24  | 0.02 | 0.02 | 0.0005631 | N |
| Bacteria | Porphyromonadaceae_bacterium_OUH_334697      | 57  | 16  | 0.06 | 0.06 | 0.0005592 | N |
| Bacteria | Lachnospiraceae_oral_taxon_107_str_F0167     | 178 | 57  | 0.04 | 0.04 | 0.0005485 | N |

## Microbial DNA free water.cont.

|          |                                                     |     |    |      |      |           |   |
|----------|-----------------------------------------------------|-----|----|------|------|-----------|---|
| Bacteria | <i>Streptococcus_infantis</i> _ATCC_700779          | 33  | 32 | 0.08 | 0.08 | 0.0005445 | N |
| Bacteria | <i>Rothia_mucilaginosa</i> _DY_18                   | 74  | 74 | 0.06 | 0.12 | 0.0005441 | N |
| Bacteria | <i>Bifidobacterium_saeculare</i> _DSM_6531_LMG_1493 | 124 | 33 | 0.04 | 0.04 | 0.000512  | N |
| Bacteria | <i>Citrobacter_28747</i> Branch                     | 25  | 25 | 0.08 | 0.08 | 0.0005081 | N |
| Bacteria | <i>Terrisporobacter_sp_08_306576</i>                | 81  | 74 | 0.06 | 0.06 | 0.0005061 | N |
| Bacteria | <i>Pseudobutyrvibrio_27608</i> Branch               | 29  | 14 | 0.04 | 0.04 | 0.0004142 | N |
| Bacteria | <i>Lactobacillus_salivarius</i> _CECT_5713          | 13  | 13 | 0.1  | 0.05 | 0.0005059 | N |
| Bacteria | <i>Actinomyces_odontolyticus_21164</i> Branch       | 36  | 34 | 0.05 | 0.05 | 0.0004422 | N |
| Bacteria | <i>Coprobacter_fastidiosus</i> _NSB1                | 128 | 23 | 0.03 | 0.03 | 0.0004771 | N |
| Bacteria | <i>Lachnobacterium_bovis</i> _C6A12                 | 17  | 12 | 0.08 | 0.04 | 0.0004601 | N |
| Bacteria | <i>Prevotella_oralis</i> _CC98A                     | 207 | 24 | 0.02 | 0.01 | 0.0004583 | N |
| Bacteria | <i>Collinsella_tanakaei</i> _YIT_12063              | 103 | 81 | 0.05 | 0.05 | 0.0004414 | N |
| Bacteria | <i>Succinospira_mobilis</i> _DSM_6222               | 157 | 37 | 0.03 | 0.03 | 0.0004415 | N |
| Bacteria | <i>Bacteroides_reticulotermitis</i> _JCM_10512      | 275 | 49 | 0.03 | 0.03 | 0.0004333 | N |
| Bacteria | <i>Enorma_massiliensis</i> _pHl                     | 127 | 63 | 0.04 | 0.04 | 0.0004214 | N |
| Bacteria | <i>Haemophilus_sp_oral_taxon_851_str_F0397</i>      | 28  | 27 | 0.06 | 0.07 | 0.0004129 | N |
| Bacteria | <i>Clostridium_spiroforme</i> _DSM_1552             | 65  | 52 | 0.05 | 0.05 | 0.000405  | N |
| Bacteria | <i>Oribacterium_sp_oral_taxon_078_str_F0263</i>     | 56  | 39 | 0.05 | 0.04 | 0.0003927 | N |
| Bacteria | <i>Ruminococcus_gauvreauii</i> _DSM_19829           | 132 | 76 | 0.04 | 0.04 | 0.0003934 | N |
| Bacteria | <i>Lachnoanaerobaculum_saburreum</i> _DSM_3986      | 75  | 27 | 0.04 | 0.03 | 0.0003706 | N |
| Bacteria | <i>Sutterella_wadsworthensis_2_1_59BFAA</i>         | 197 | 36 | 0.02 | 0.03 | 0.0003643 | N |
| Bacteria | <i>Acidaminococcus_fermentans</i> _DSM_20731        | 134 | 50 | 0.03 | 0.08 | 0.0003551 | N |
| Bacteria | <i>Peptostreptococcaceae_bacterium_VA2</i>          | 56  | 51 | 0.04 | 0.06 | 0.0003383 | N |
| Bacteria | <i>Bacteroides_propionificiens</i> _DSM_1333 Branch | 16  | 12 | 0.01 | 0.01 | 0.0003384 | N |
| Bacteria | <i>Porphyromonas_bennonis</i> _DSM_23058_JCM_1633   | 97  | 42 | 0.03 | 0.03 | 0.0003322 | N |
| Bacteria | <i>Veillonella_parvula</i> _ACS_068_V_Sch12         | 17  | 17 | 0.05 | 0.18 | 0.0003207 | N |
| Bacteria | <i>Citrobacter_werkmanii</i> _NBRC_105721           | 68  | 67 | 0.04 | 0.07 | 0.0003124 | N |
| Bacteria | <i>Prevotella_scopos</i> _JCM_17725                 | 246 | 18 | 0.01 | 0.01 | 0.0003131 | N |
| Bacteria | <i>Enterobacter_sp_5_4</i>                          | 14  | 14 | 0.06 | 0.44 | 0.0003057 | N |
| Bacteria | <i>Candidatus_Soleaferrea_massiliensis</i> _AP7     | 101 | 63 | 0.03 | 0.03 | 0.0003044 | N |
| Bacteria | Burkholderiales_Order_15_6184_Node_25062            | 147 | 25 | 0.02 | 0.02 | 0.0003049 | N |
| Bacteria | <i>Prevotella_denticola</i> _1011 Branch            | 101 | 12 | 0.01 | 0.01 | 0.0002745 | N |
| Bacteria | <i>Butyrivibrio_sp_27738</i> Branch                 | 62  | 25 | 0.02 | 0.02 | 0.0002292 | N |

Microbial DNA free water.cont.

|          |                                          |     |     |      |      |           |   |
|----------|------------------------------------------|-----|-----|------|------|-----------|---|
| Bacteria | Porphyromonas_asaccharolytica_780 Branch | 52  | 17  | 0.02 | 0.02 | 0.0002511 | N |
| Bacteria | Prevotella_brevis_ATCC_19188             | 167 | 18  | 0.01 | 0.02 | 0.0002776 | N |
| Bacteria | Prevotella_falsenii_DSM_22864_JCM_15124  | 226 | 16  | 0.01 | 0.01 | 0.0002587 | N |
| Bacteria | Aggregatibacter_segnis_ATCC_33393        | 43  | 38  | 0.03 | 0.03 | 0.0002533 | N |
| Bacteria | Olsenella_uli_MSTE5                      | 30  | 19  | 0.04 | 0.05 | 0.0002508 | N |
| Bacteria | Clostridium_hylemonae_DSM_15053          | 115 | 47  | 0.02 | 0.03 | 0.0002518 | N |
| Bacteria | Olsenella_profusa_F0195                  | 64  | 51  | 0.03 | 0.03 | 0.0002384 | N |
| Bacteria | Slackia_piriformis_YIT_12062             | 49  | 44  | 0.03 | 0.03 | 0.0002354 | N |
| Bacteria | Clostridium_sordellii_26858 Branch       | 19  | 18  | 0.02 | 0.03 | 0.0002239 | N |
| Bacteria | Clostridium_sporosphaeroides_DSM_1294    | 102 | 44  | 0.02 | 0.02 | 0.0002317 | N |
| Bacteria | Clostridium_27788 Branch                 | 67  | 38  | 0.02 | 0.02 | 0.0002206 | N |
| Bacteria | Pseudobutyrvibrio_ruminis_AD2017         | 96  | 31  | 0.02 | 0.03 | 0.000227  | N |
| Bacteria | Eubacterium_cellulosolvens_LD2006        | 80  | 47  | 0.03 | 0.03 | 0.0002236 | N |
| Bacteria | Actinomyces_graevenitzii_F0530           | 33  | 33  | 0.03 | 0.07 | 0.0002222 | N |
| Bacteria | Robinsoniella_27415 Branch               | 58  | 32  | 0.02 | 0.02 | 0.0001822 | N |
| Bacteria | Campylobacter_hominis_ATCC_BAA_381       | 24  | 24  | 0.03 | 0.03 | 0.0002118 | N |
| Bacteria | bacterium_MS4                            | 126 | 32  | 0.02 | 0.02 | 0.0002068 | N |
| Bacteria | Eubacterium_xylanophilum_ATCC_35991      | 95  | 24  | 0.02 | 0.02 | 0.0002059 | N |
| Bacteria | Porphyromonas_somerae_DSM_23386          | 151 | 13  | 0.01 | 0.01 | 0.0002054 | N |
| Bacteria | Atopobium_rimae_ATCC_49626               | 35  | 35  | 0.03 | 0.03 | 0.0002026 | N |
| Bacteria | Atopobium_parvulum_DNF00906              | 20  | 20  | 0.03 | 0.03 | 0.0002001 | N |
| Bacteria | Allobaculum_stercoricanis_DSM_13633      | 50  | 27  | 0.02 | 0.02 | 0.0001946 | N |
| Virus    | Shigella_phage_SfIV                      | 134 | 134 | 1.54 | 1.81 | 30.23     | Y |
| Virus    | Pseudomonas_phage_Pf1                    | 42  | 42  | 1.64 | 1.64 | 19.83     | N |
| Virus    | Enterobacteria_phage_YYZ_2008            | 109 | 109 | 1.78 | 1.78 | 18.26     | N |
| Virus    | Stx2_converting_phage_1717               | 70  | 70  | 0.9  | 0.76 | 12.3      | N |
| Virus    | Streptococcus_phage_20617                | 114 | 114 | 0.58 | 0.58 | 8.829     | N |
| Virus    | Propionibacterium_phage_P105             | 24  | 24  | 0.68 | 0.69 | 7.115     | N |
| Virus    | Escherichia_phage_TL_2011b               | 41  | 41  | 0.29 | 0.21 | 3.441     | N |

Respiratory Virus no calls detected above threshold

|       |                              |    |    |      |      |       |
|-------|------------------------------|----|----|------|------|-------|
| Fungi | Enterocytozoon_bieneusi_H348 | 57 | 37 | 0.17 | 0.17 | 100 N |
|-------|------------------------------|----|----|------|------|-------|

|         |                                          |     |    |      |      |       |
|---------|------------------------------------------|-----|----|------|------|-------|
| Protist | Cyclospora_cayetanensis_strain_CHN_HEN01 | 919 | 22 | 0.03 | 0.03 | 100 Y |
|---------|------------------------------------------|-----|----|------|------|-------|

|                       |                                                |        |      |       |       |   |
|-----------------------|------------------------------------------------|--------|------|-------|-------|---|
| Antibiotic Resistance | Tetracycline_tet_32                            | 1885   | 208  | 100   | 100   | Y |
| Antibiotic Resistance | Macrolide_lnuB                                 | 146    | 16   | 100   | 100   | Y |
| Antibiotic Resistance | Beta-lactam-resistance_blaOXA_347              | 15572  | 322  | 100   | 100   | Y |
| Antibiotic Resistance | Beta-lactam_cfxA4                              | 89     | 15   | 100   | 100   | Y |
| Antibiotic Resistance | Beta-lactam_cfxA_2367 Branch                   | 716    | 15   | 100   | 100   | Y |
| Antibiotic Resistance | Aminoglycoside_aac6'_aph2''                    | 103980 | 871  | 100   | 100   | Y |
| Antibiotic Resistance | Aminoglycoside_aph3'_III                       | 1277   | 359  | 99.45 | 99.45 | Y |
| Antibiotic Resistance | Tetracycline_tet40                             | 555    | 74   | 81.32 | 96.89 | Y |
| Antibiotic Resistance | Plasmid-mediated-aminoglycoside-resistance_npm | 838    | 336  | 96.83 | 96.83 | Y |
| Antibiotic Resistance | Tetracycline_tetQ                              | 216997 | 1854 | 96.21 | 96.21 | Y |
| Antibiotic Resistance | Aminoglycoside_sat4A                           | 15     | 10   | 100   | 95.68 | Y |
| Antibiotic Resistance | beta_lactamase_CbIA_1                          | 5338   | 361  | 95.25 | 95.25 | Y |
| Antibiotic Resistance | Aminoglycoside_aadA_2151 Branch                | 11     | 11   | 78.57 | 94.53 | Y |
| Antibiotic Resistance | Dihydrofolate-reductase_dfrF                   | 1822   | 250  | 94.34 | 94.34 | Y |
| Antibiotic Resistance | Transporter-gene_IsaE                          | 2935   | 766  | 92.74 | 92.74 | Y |
| Antibiotic Resistance | Tetracycline_tet32                             | 1565   | 307  | 74.33 | 90.85 | Y |
| Antibiotic Resistance | Macrolide_ermF                                 | 39869  | 500  | 89.13 | 89.41 | Y |
| Antibiotic Resistance | Sulphonamide_sul_2049 Branch                   | 758    | 341  | 88.11 | 88.11 | Y |
| Antibiotic Resistance | Macrolide_lnuC                                 | 1188   | 229  | 87.74 | 87.74 | Y |

## Microbial DNA free water.cont.

|                       |                                                |       |      |       |       |   |
|-----------------------|------------------------------------------------|-------|------|-------|-------|---|
| Antibiotic Resistance | Phenicol_catP                                  | 27    | 15   | 53.57 | 85.32 | Y |
| Antibiotic Resistance | Tetracycline_tetO                              | 11758 | 705  | 81.13 | 81.13 | Y |
| Antibiotic Resistance | Phenicol_cmlA_2475 Branch                      | 34    | 20   | 100   | 77.93 | Y |
| Antibiotic Resistance | Aminoglycoside_aph4_la                         | 443   | 277  | 75.27 | 75.27 | Y |
| Antibiotic Resistance | Aminoglycoside_aadA_2142 Branch                | 48    | 48   | 68.57 | 75    | Y |
| Antibiotic Resistance | Aminoglycoside_aac3_IVa                        | 375   | 209  | 74.11 | 74.11 | Y |
| Antibiotic Resistance | Macrolide_ermB                                 | 47142 | 393  | 64.11 | 70.39 | Y |
| Antibiotic Resistance | Tetracycline_tetW                              | 59165 | 1139 | 69.66 | 69.66 | Y |
| Antibiotic Resistance | Macrolide_mefB                                 | 557   | 349  | 60.8  | 60.8  | Y |
| Antibiotic Resistance | Sulphonamide_sul2                              | 8505  | 284  | 54.3  | 54.3  | Y |
| Antibiotic Resistance | Tetracycline_tet44                             | 2600  | 777  | 53.85 | 53.85 | Y |
| Antibiotic Resistance | Aminoglycoside_a_2394 Branch                   | 349   | 161  | 77.03 | 52.87 | Y |
| Antibiotic Resistance | Tetracycline_tetX                              | 15297 | 620  | 51.33 | 51.33 | Y |
| Antibiotic Resistance | Aminoglycoside_aac6'_Im                        | 114   | 112  | 42.75 | 42.75 | Y |
| Antibiotic Resistance | Macrolide_ermG                                 | 193   | 193  | 39.63 | 39.63 | N |
| Antibiotic Resistance | Tetracycline_tetBP                             | 619   | 415  | 38.25 | 38.25 | N |
| Antibiotic Resistance | Tetracycline_tetM                              | 6833  | 1089 | 37.36 | 37.54 | N |
| Antibiotic Resistance | Aminoglycoside_aph_2302 Branch                 | 211   | 129  | 32.01 | 32.01 | N |
| Antibiotic Resistance | Macrolide_mefA                                 | 10158 | 331  | 22.55 | 22.55 | N |
| Antibiotic Resistance | Macrolide_ermQ                                 | 194   | 99   | 21.29 | 21.29 | N |
| Antibiotic Resistance | Aminoglycoside_ant2''_la                       | 41    | 37   | 71.15 | 15.29 | N |
| Antibiotic Resistance | Phenicol_catB4                                 | 62    | 35   | 70    | 15.02 | N |
| Antibiotic Resistance | Repressor_nalC                                 | 28    | 28   | 14.58 | 14.58 | N |
| Antibiotic Resistance | Beta-lactam_cfxA6                              | 2440  | 57   | 11.38 | 13.11 | N |
| Antibiotic Resistance | Tetracycline_tetD                              | 62    | 62   | 9.32  | 9.32  | N |
| Antibiotic Resistance | Sensor-kinase_cpxA                             | 69    | 49   | 8.86  | 8.86  | N |
| Antibiotic Resistance | Beta-lactam-resistance_bla_244_1197_740 Branch | 25    | 22   | 8.46  | 8.46  | N |
| Antibiotic Resistance | MDR-Efflux-pump_mdtP                           | 45    | 45   | 8.02  | 8.02  | N |
| Antibiotic Resistance | Involved-in-polymyxin-resistance_pmrC          | 82    | 52   | 7.28  | 7.28  | N |
| Antibiotic Resistance | Membrane-fusion-protein_emrK                   | 33    | 33   | 6.51  | 6.51  | N |
| Antibiotic Resistance | MDR-protein_mdth                               | 26    | 26   | 5.5   | 5.5   | N |



Microbial DNA free water.cont.

|                  |                                        |        |      |     |     |   |
|------------------|----------------------------------------|--------|------|-----|-----|---|
| Virulence Factor | Bacteroides_fragilis_GENE_tetQ         | 142218 | 710  | 100 | 100 | Y |
| Virulence Factor | Bacteroides_fragilis_GI_46242796       | 144678 | 1506 | 100 | 100 | Y |
| Virulence Factor | Bacteroides_fragilis_GENE_rteA         | 110440 | 899  | 100 | 100 | Y |
| Virulence Factor | Bacteroides_fragilis_GENE_exc          | 77579  | 745  | 100 | 100 | Y |
| Virulence Factor | Bacteroides_fragilis_GENE_bmhA         | 85582  | 944  | 100 | 100 | Y |
| Virulence Factor | Bacteroides_fragilis_GI_46242807       | 45665  | 493  | 100 | 100 | Y |
| Virulence Factor | Bacteroides_fragilis_GENE_int          | 37792  | 348  | 100 | 100 | Y |
| Virulence Factor | Bacteroides_fragilis_GENE_mobC         | 52717  | 765  | 100 | 100 | Y |
| Virulence Factor | Bacteroides_fragilis_GENE_rteB         | 36881  | 454  | 100 | 100 | Y |
| Virulence Factor | Bacteroides_fragilis_GI_46242797       | 34338  | 473  | 100 | 100 | Y |
| Virulence Factor | Bacteroides_fragilis_GENE_mobB         | 30766  | 415  | 100 | 100 | Y |
| Virulence Factor | Bacteroides_fragilis_GI_46242808       | 17673  | 135  | 100 | 100 | Y |
| Virulence Factor | Bacteroides_fragilis_GI_46242805       | 19794  | 190  | 100 | 100 | Y |
| Virulence Factor | Bacteroides_fragilis_GI_46242799       | 18284  | 170  | 100 | 100 | Y |
| Virulence Factor | Bacteroides_fragilis_GI_46242810       | 12795  | 93   | 100 | 100 | Y |
| Virulence Factor | Bacteroides_fragilis_GENE_rteC         | 16352  | 196  | 100 | 100 | Y |
| Virulence Factor | Bacteroides_fragilis_GENE_mobA         | 13831  | 149  | 100 | 100 | Y |
| Virulence Factor | Bacteroides_fragilis_GI_46242809       | 10771  | 121  | 100 | 100 | Y |
| Virulence Factor | Bacteroides_fragilis_GI_46242811       | 8436   | 74   | 100 | 100 | Y |
| Virulence Factor | Bacteroides_fragilis_GENE_rhuM         | 8144   | 95   | 100 | 100 | Y |
| Virulence Factor | Bacteroides_fragilis_GENE_traA         | 9195   | 219  | 100 | 100 | Y |
| Virulence Factor | Bacteroides_fragilis_GENE_traC         | 5725   | 125  | 100 | 100 | Y |
| Virulence Factor | Bacteroides_fragilis_GENE_traF         | 3332   | 60   | 100 | 100 | Y |
| Virulence Factor | Bacteroides_fragilis_GI_46242774       | 2773   | 263  | 100 | 100 | Y |
| Virulence Factor | Vibrio_cholerae_GENE_int11             | 16     | 13   | 100 | 100 | Y |
| Virulence Factor | Proteus_mirabilis_GENE_tnpA            | 22     | 20   | 100 | 100 | Y |
| Virulence Factor | Enterococcus_faecium_GENE_ermB         | 49002  | 351  | 100 | 100 | Y |
| Virulence Factor | Enterococcus_faecium_GI_21886747       | 1893   | 27   | 100 | 100 | Y |
| Virulence Factor | Enterococcus_faecium_GI_21886746       | 1906   | 56   | 100 | 100 | Y |
| Virulence Factor | Parabacteroides_distasonis_GI_32395281 | 874    | 22   | 100 | 100 | Y |
| Virulence Factor | Bacteroides_vulgatus_GI_33413459       | 3966   | 95   | 100 | 100 | Y |
| Virulence Factor | Staphylococcus_aureus_GENE_AACA-APHD   | 66843  | 568  | 100 | 100 | Y |

Microbial DNA free water.cont.

|                  |                                             |       |     |       |       |   |
|------------------|---------------------------------------------|-------|-----|-------|-------|---|
| Virulence Factor | Staphylococcus_aureus_GI_33390945           | 3968  | 66  | 100   | 100   | Y |
| Virulence Factor | Bacteroides_thetaiotaomicron_GeneID_BTV3705 | 2403  | 143 | 100   | 100   | Y |
| Virulence Factor | Bacteroides_thetaiotaomicron_GeneID_BTV1816 | 466   | 138 | 100   | 100   | Y |
| Virulence Factor | Bacteroides_thetaiotaomicron_GeneID_BTV3502 | 304   | 85  | 100   | 100   | Y |
| Virulence Factor | Enterococcus_faecium_GENE_sat4              | 354   | 164 | 99.39 | 99.39 | Y |
| Virulence Factor | Bacteroides_fragilis_GI_37812496            | 35914 | 512 | 96.79 | 96.79 | Y |
| Virulence Factor | Bacteroides_thetaiotaomicron_GeneID_BTV0319 | 326   | 150 | 96.77 | 96.77 | Y |
| Virulence Factor | Bacteroides_fragilis_GENE_traB              | 5835  | 155 | 95.09 | 95.09 | Y |
| Virulence Factor | Bacteroides_fragilis_GENE_traM              | 10910 | 401 | 92.61 | 92.61 | Y |
| Virulence Factor | Bacteroides_fragilis_GENE_traI              | 5705  | 209 | 92.07 | 92.07 | Y |
| Virulence Factor | Bacteroides_fragilis_GI_46242772            | 696   | 84  | 91.3  | 91.3  | Y |
| Virulence Factor | Bacteroides_thetaiotaomicron_GeneID_BTV1572 | 301   | 185 | 89.81 | 89.81 | Y |
| Virulence Factor | Bacteroides_fragilis_GENE_traE              | 3652  | 87  | 89.69 | 89.69 | Y |
| Virulence Factor | Bacteroides_fragilis_GENE_traH              | 2214  | 103 | 89.57 | 89.57 | Y |
| Virulence Factor | Bacteroides_thetaiotaomicron_GeneID_BTV0525 | 1720  | 848 | 89.17 | 89.17 | Y |
| Virulence Factor | Bacteroides_fragilis_GENE_traD              | 10294 | 234 | 88.64 | 88.64 | Y |
| Virulence Factor | Enterococcus_faecium_GI_21886752            | 1140  | 294 | 88.29 | 88.29 | Y |
| Virulence Factor | Bacteroides_thetaiotaomicron_GeneID_BTV3480 | 351   | 133 | 88.08 | 88.08 | Y |
| Virulence Factor | Bacteroides_uniformis_GI_436818             | 2631  | 201 | 87.77 | 87.77 | Y |
| Virulence Factor | Bacteroides_fragilis_GENE_traJ              | 7180  | 310 | 84.93 | 84.93 | Y |
| Virulence Factor | Bacteroides_fragilis_GENE_lys               | 4565  | 146 | 84.88 | 84.88 | Y |
| Virulence Factor | Bacteroides_fragilis_GENE_traO              | 943   | 154 | 84.61 | 84.61 | Y |
| Virulence Factor | Bacteroides_fragilis_GENE_traQ              | 4310  | 125 | 83.89 | 83.89 | Y |
| Virulence Factor | Parabacteroides_distasonis_GI_32395282      | 4621  | 76  | 82.61 | 82.61 | Y |
| Virulence Factor | Bacteroides_thetaiotaomicron_GeneID_BTV2148 | 603   | 337 | 82.4  | 82.4  | Y |
| Virulence Factor | Bacteroides_fragilis_GENE_traP              | 1523  | 222 | 81.62 | 81.62 | Y |
| Virulence Factor | Bacteroides_thetaiotaomicron_GeneID_BTV3482 | 1254  | 691 | 81.49 | 81.49 | Y |
| Virulence Factor | Bacteroides_thetaiotaomicron_GeneID_BTV0526 | 472   | 353 | 81.34 | 81.34 | Y |
| Virulence Factor | Bacteroides_thetaiotaomicron_GeneID_BTV3481 | 1273  | 568 | 80.8  | 80.8  | Y |
| Virulence Factor | Bacteroides_thetaiotaomicron_GeneID_BTV2147 | 568   | 343 | 79.22 | 79.22 | Y |
| Virulence Factor | Bacteroides_fragilis_GENE_yahA              | 1986  | 86  | 78.9  | 78.9  | Y |
| Virulence Factor | Bacteroides_thetaiotaomicron_GeneID_BTV0320 | 329   | 232 | 78.11 | 78.11 | Y |
| Virulence Factor | Streptococcus_pyogenes_GI_52345264          | 3093  | 268 | 77.01 | 77.01 | Y |

Microbial DNA free water.cont.

|                  |                                             |       |     |       |       |   |
|------------------|---------------------------------------------|-------|-----|-------|-------|---|
| Virulence Factor | Bacteroides_fragilis_GENE_traN              | 9884  | 219 | 75.78 | 75.78 | Y |
| Virulence Factor | Bacteroides_thetaiotaomicron_GeneID_BTV1573 | 838   | 400 | 75.33 | 75.33 | Y |
| Virulence Factor | Bacteroides_thetaiotaomicron_GeneID_BTV0318 | 728   | 369 | 73.36 | 73.36 | Y |
| Virulence Factor | Bacteroides_thetaiotaomicron_GeneID_BTV3476 | 1600  | 711 | 72.92 | 72.92 | Y |
| Virulence Factor | Bacteroides_fragilis_GENE_traG              | 20058 | 643 | 71.84 | 71.84 | Y |
| Virulence Factor | Bacteroides_fragilis_GENE_traK              | 5827  | 139 | 71.28 | 71.28 | Y |
| Virulence Factor | Bacteroides_thetaiotaomicron_GeneID_BTV0528 | 286   | 175 | 70.85 | 70.85 | Y |
| Virulence Factor | Bacteroides_thetaiotaomicron_GeneID_BTV2143 | 732   | 397 | 70.26 | 70.26 | Y |
| Virulence Factor | Bacteroides_thetaiotaomicron_GeneID_BTV2145 | 1368  | 619 | 69.94 | 69.94 | Y |
| Virulence Factor | Bacteroides_thetaiotaomicron_GeneID_BTV1815 | 309   | 182 | 67.66 | 67.66 | Y |
| Virulence Factor | Bacteroides_fragilis_GENE_traL              | 1561  | 54  | 66.67 | 66.67 | Y |
| Virulence Factor | Bacteroides_thetaiotaomicron_GeneID_BTV4099 | 1190  | 527 | 65.63 | 65.63 | Y |
| Virulence Factor | Bacteroides_thetaiotaomicron_GeneID_BTV3246 | 1320  | 511 | 64.03 | 64.03 | Y |
| Virulence Factor | Enterobacter_aerogenes_GENE_tniA            | 452   | 284 | 63.25 | 63.25 | Y |
| Virulence Factor | Bacteroides_thetaiotaomicron_GeneID_BTV2144 | 178   | 136 | 58.87 | 58.87 | Y |
| Virulence Factor | Bacteroides_thetaiotaomicron_GeneID_BTV1571 | 152   | 72  | 58.54 | 58.54 | Y |
| Virulence Factor | Bacteroides_thetaiotaomicron_GeneID_BTV1809 | 821   | 456 | 58.24 | 58.24 | Y |
| Virulence Factor | Bacteroides_thetaiotaomicron_GeneID_BTV4098 | 429   | 207 | 55.8  | 55.8  | Y |
| Virulence Factor | Bacteroides_thetaiotaomicron_GeneID_BTV3244 | 536   | 233 | 55.08 | 55.08 | Y |
| Virulence Factor | Enterococcus_faecium_GENE_aadE              | 419   | 189 | 53.54 | 53.54 | Y |
| Virulence Factor | Bacteroides_thetaiotaomicron_GeneID_BTV3490 | 262   | 119 | 52.89 | 52.89 | Y |
| Virulence Factor | Enterococcus_faecium_GI_21886751            | 668   | 191 | 51.76 | 51.76 | Y |
| Virulence Factor | Bacteroides_thetaiotaomicron_GeneID_BTV2038 | 523   | 225 | 51.02 | 51.02 | Y |
| Virulence Factor | Bacteroides_thetaiotaomicron_GeneID_BTV3245 | 173   | 112 | 50.68 | 50.68 | Y |
| Virulence Factor | Bacteroides_thetaiotaomicron_GeneID_BTV1810 | 170   | 83  | 49.4  | 49.4  | Y |
| Virulence Factor | Bacteroides_thetaiotaomicron_GeneID_BTV2146 | 859   | 335 | 48.48 | 48.48 | Y |
| Virulence Factor | Bacteroides_thetaiotaomicron_GeneID_BTV1813 | 475   | 276 | 48.25 | 48.25 | Y |
| Virulence Factor | Bacteroides_thetaiotaomicron_GeneID_BTV1811 | 113   | 62  | 47.69 | 47.69 | Y |
| Virulence Factor | Bacteroides_thetaiotaomicron_GeneID_BTV4100 | 41    | 41  | 47.13 | 47.13 | Y |
| Virulence Factor | Pseudomonas_aeruginosa_GENE_intI1           | 24    | 23  | 46    | 46    | Y |
| Virulence Factor | Bacteroides_thetaiotaomicron_GeneID_BTV1812 | 243   | 133 | 41.3  | 41.3  | Y |
| Virulence Factor | Bacteroides_thetaiotaomicron_GeneID_BTV0527 | 201   | 110 | 39.43 | 39.43 | N |
| Virulence Factor | Streptococcus_pyogenes_GENE_mefA            | 5549  | 189 | 39.05 | 39.05 | N |

Microbial DNA free water.cont.

|                  |                                             |     |     |       |       |   |
|------------------|---------------------------------------------|-----|-----|-------|-------|---|
| Virulence Factor | Bacteroides_thetaiotaomicron_GeneID_BTV1214 | 146 | 100 | 35.97 | 35.97 | N |
| Virulence Factor | Bacteroides_thetaiotaomicron_GeneID_BTV1213 | 322 | 161 | 33.54 | 33.54 | N |
| Virulence Factor | Bacteroides_thetaiotaomicron_GeneID_BTV1814 | 391 | 157 | 28.34 | 28.34 | N |
| Virulence Factor | Enterococcus_faecalis_GI_8100672            | 66  | 29  | 26.85 | 26.85 | N |
| Virulence Factor | Pseudomonas_aeruginosa_GENE_pilP            | 52  | 44  | 26.83 | 26.83 | N |
| Virulence Factor | Bacteroides_fragilis_GI_46242769            | 389 | 38  | 25.68 | 25.68 | N |
| Virulence Factor | Pseudomonas_aeruginosa_GeneID_PA0080        | 20  | 20  | 24.69 | 24.69 | N |
| Virulence Factor | Enterococcus_faecalis_GI_48190              | 651 | 141 | 22.35 | 22.35 | N |
| Virulence Factor | Streptococcus_pyogenes_GI_52345271          | 36  | 36  | 20.69 | 20.69 | N |
| Virulence Factor | Klebsiella_oxytoca_GI_4775482               | 50  | 50  | 18.45 | 18.45 | N |
| Virulence Factor | Pseudomonas_aeruginosa_GENE_tnpA            | 614 | 337 | 15.81 | 15.81 | N |
| Virulence Factor | Pseudomonas_aeruginosa_GENE_lasR            | 29  | 29  | 13.36 | 13.36 | N |
| Virulence Factor | Pseudomonas_aeruginosa_GeneID_PA0087        | 15  | 15  | 13.04 | 13.04 | N |
| Virulence Factor | Streptococcus_pyogenes_GI_52345272          | 18  | 18  | 12.77 | 12.77 | N |
| Virulence Factor | Enterococcus_faecalis_GENE_mobB             | 70  | 70  | 12.19 | 12.19 | N |
| Virulence Factor | Enterococcus_faecalis_GI_8100663            | 110 | 78  | 12.17 | 12.17 | N |
| Virulence Factor | Pseudomonas_aeruginosa_GENE_algB            | 42  | 42  | 11.35 | 11.59 | N |
| Virulence Factor | Pseudomonas_aeruginosa_GENE_flgI            | 33  | 33  | 11.11 | 11.11 | N |
| Virulence Factor | Enterococcus_faecalis_GI_8100671            | 69  | 49  | 11.01 | 11.01 | N |
| Virulence Factor | Enterococcus_faecalis_GI_8100673            | 109 | 12  | 10    | 10    | N |
| Virulence Factor | Bacteroides_fragilis_GI_46242770            | 470 | 14  | 9.79  | 9.79  | N |
| Virulence Factor | Yersinia_pestis_GENE_ybtU                   | 28  | 28  | 7.57  | 7.57  | N |
| Virulence Factor | Pseudomonas_aeruginosa_GENE_pchI            | 23  | 23  | 7.28  | 7.28  | N |
| Virulence Factor | Yersinia_pestis_GENE_ybtS                   | 37  | 37  | 7.26  | 7.26  | N |
| Virulence Factor | Pseudomonas_aeruginosa_GENE_algX            | 24  | 24  | 7.21  | 7.21  | N |
| Virulence Factor | Pseudomonas_aeruginosa_GENE_fliM            | 22  | 22  | 7.07  | 7.07  | N |
| Virulence Factor | Pseudomonas_aeruginosa_GENE_xcpQ            | 41  | 32  | 6.99  | 6.99  | N |
| Virulence Factor | Pseudomonas_aeruginosa_GENE_fliG            | 18  | 18  | 6.54  | 6.54  | N |
| Virulence Factor | Yersinia_pestis_GENE_ybtX                   | 28  | 28  | 6.11  | 6.11  | N |
| Virulence Factor | Pseudomonas_aeruginosa_GENE_clpV1           | 23  | 23  | 5.85  | 5.85  | N |
| Virulence Factor | Enterobacter_aerogenes_GENE_tnpA            | 46  | 27  | 5.3   | 5.3   | N |

Microbial DNA free water.cont.

Staphylococcus aureus control.

| Database | Organism                                 | Unique Matches Frequency | Unique Matches | % Unique Matches | % Total Matches | Relative Abundance | Above Threshold |
|----------|------------------------------------------|--------------------------|----------------|------------------|-----------------|--------------------|-----------------|
| Bacteria | Staphylococcus_aureus_1801_2_2011        | 234                      | 65             | 25.29            | 72.1            | 99.85              | Y               |
| Bacteria | Propionibacterium_20956 Branch           | 48                       | 48             | 0.33             | 0.29            | 0.05375            | N               |
| Bacteria | Chlamydia_psittaci_06_1683               | 17                       | 17             | 0.62             | 0.62            | 0.02123            | N               |
| Bacteria | Staphylococcus_6209 Branch               | 35                       | 27             | 0.06             | 0.06            | 0.008317           | N               |
| Bacteria | Staphylococcus_epidermidis_NIHLM_6071    | 54                       | 18             | 0.19             | 0.15            | 0.01039            | N               |
| Bacteria | Staphylococcus_warneri_6227 Branch       | 18                       | 14             | 0.02             | 0.04            | 0.008516           | N               |
| Bacteria | Staphylococcus_lugdunensis_6250 Branch   | 101                      | 71             | 0.06             | 0.06            | 0.00527            | N               |
| Bacteria | Staphylococcus_simiae_CCM_7213           | 242                      | 165            | 0.12             | 0.12            | 0.00778            | N               |
| Bacteria | Lactococcus_lactis_subsp_cremoris_4136 E | 16                       | 16             | 0.15             | 0.26            | 0.004974           | N               |
| Bacteria | Staphylococcus_s_6275 Branch             | 50                       | 36             | 0.03             | 0.04            | 0.003523           | N               |
| Bacteria | Stenotrophomonas_maltophilia_strain_53   | 118                      | 113            | 0.07             | 0.08            | 0.003772           | N               |
| Bacteria | Staphylococcus_capitis_6320 Branch       | 49                       | 26             | 0.05             | 0.07            | 0.00355            | N               |
| Bacteria | Staphylococcus_sp_E463                   | 43                       | 22             | 0.07             | 0.06            | 0.003167           | N               |
| Bacteria | Xanthomonas_campestris_37936 Branch      | 29                       | 28             | 0.04             | 0.04            | 0.002382           | N               |
| Bacteria | Staphylococcus_6307 Branch               | 53                       | 35             | 0.03             | 0.03            | 0.002192           | N               |
| Bacteria | Staphylococcus_6310 Branch               | 37                       | 30             | 0.03             | 0.03            | 0.00198            | N               |
| Bacteria | Staphylococcus_caprae_M23864_W1          | 70                       | 55             | 0.04             | 0.04            | 0.001917           | N               |
| Bacteria | Bradyrhizobium_sp_BTai1                  | 75                       | 71             | 0.04             | 0.04            | 0.001845           | N               |
| Bacteria | Geobacillus_sp_WCH70                     | 66                       | 61             | 0.04             | 0.04            | 0.001777           | N               |
| Bacteria | Delftia_25859 Branch                     | 21                       | 21             | 0.04             | 0.04            | 0.001636           | N               |
| Bacteria | Staphylococcus_6285 Branch               | 71                       | 36             | 0.03             | 0.03            | 0.001708           | N               |
| Bacteria | Acidovorax_25090 Branch                  | 38                       | 38             | 0.03             | 0.03            | 0.001385           | N               |
| Bacteria | Halomonas_sp_KM_1                        | 55                       | 53             | 0.03             | 0.03            | 0.001287           | N               |
| Bacteria | Staphylococcus_6247 Branch               | 26                       | 17             | 0.02             | 0.03            | 0.001178           | N               |
| Bacteria | Staphylococcus_gallinarum_strain_DSM_20  | 59                       | 37             | 0.02             | 0.02            | 0.001141           | N               |
| Virus    | Staphylococcus_phage_phi2958PVL          | 179313                   | 452            | 35.85            | 35.85           | 72.11              | Y               |
| Virus    | Staphylococcus_prophage_phiPV83          | 29539                    | 128            | 1.87             | 1.83            | 27.87              | Y               |
| Virus    | Pseudomonas_phage_Pf1                    | 45                       | 45             | 1.75             | 1.75            | 0.01149            | N               |

Staphylococcus aureus cont.

|       |                           |    |    |      |      |            |
|-------|---------------------------|----|----|------|------|------------|
| Virus | Lactococcus_phage_TP901_1 | 71 | 43 | 0.35 | 0.34 | 0.002618 N |
|-------|---------------------------|----|----|------|------|------------|

Respiratory Viri no calls detected above threshold

Fungi no calls detected above threshold

Protist no calls detected above threshold

|                                                    |         |      |       |       |   |
|----------------------------------------------------|---------|------|-------|-------|---|
| Antibiotic Resis Response-regulator_arIS           | 191173  | 788  | 100   | 100   | Y |
| Antibiotic Resis MDR-Efflux-pump_sav1866           | 375190  | 951  | 100   | 100   | Y |
| Antibiotic Resis Aminoglycoside_aph                | 107249  | 414  | 100   | 100   | Y |
| Antibiotic Resis Tetracycline_tet_38               | 24503   | 189  | 93.1  | 98.1  | Y |
| Antibiotic Resis Regulator_mgrA                    | 2163    | 210  | 93.33 | 93.33 | Y |
| Antibiotic Resis arIR                              | 48130   | 332  | 93    | 93    | Y |
| Antibiotic Resis Phenicol_dha1                     | 163958  | 539  | 87.5  | 87.5  | Y |
| Antibiotic Resis Repressor-of-MepA_mepR            | 40211   | 166  | 78.3  | 78.3  | Y |
| Antibiotic Resis Aminoglycoside_aac3_lk            | 17483   | 178  | 72.95 | 72.95 | Y |
| Antibiotic Resis Tetracycline_tet38                | 102     | 46   | 12.57 | 64.48 | Y |
| Antibiotic Resis Macrolide_ermC                    | 1785577 | 553  | 61.86 | 61.86 | Y |
| Antibiotic Resis Efflux-pump_mepA                  | 3849    | 482  | 54.59 | 54.59 | Y |
| Antibiotic Resis mprF                              | 244034  | 1392 | 53.83 | 53.83 | Y |
| Antibiotic Resis Signal-transcuding-protein_mecR1  | 98234   | 544  | 53.6  | 53.6  | Y |
| Antibiotic Resis Beta-lactam-resistance_blaTEM_157 | 13      | 13   | 52    | 52    | Y |
| Antibiotic Resis Beta-lactam_mecA                  | 4443    | 54   | 20.45 | 47.61 | Y |
| Antibiotic Resis Fosfomycin_fosB                   | 100626  | 225  | 42.61 | 42.61 | Y |

Staphylococcus aureus cont.

|                                                        |       |     |       |       |   |
|--------------------------------------------------------|-------|-----|-------|-------|---|
| Antibiotic Resis Quinolone_norA                        | 18440 | 600 | 34.54 | 34.54 | N |
| Antibiotic Resis Aminoglycoside_aac3_1a                | 24    | 17  | 25.76 | 15.05 | N |
| Antibiotic Resis MDR-Efflux-pump_mexG                  | 17    | 17  | 13.08 | 13.08 | N |
| Antibiotic Resis Efflux-pump_amrA                      | 11    | 11  | 18.97 | 10.58 | N |
| Antibiotic Resis Inner-membrane-transporter_mexF       | 119   | 106 | 10.37 | 10.37 | N |
| Antibiotic Resis MDR-Efflux-pump_oprN                  | 36    | 36  | 9.52  | 9.52  | N |
| Antibiotic Resis MDR-Efflux-pump_mexB                  | 93    | 93  | 9.13  | 9.13  | N |
| Antibiotic Resis Efflux-pump_triB                      | 24    | 24  | 8.63  | 8.63  | N |
| Antibiotic Resis AR 214_989_2085 Branch                | 72    | 72  | 8.43  | 8.43  | N |
| Antibiotic Resis MDR-Efflux-pump_opmH                  | 34    | 34  | 8.27  | 8.27  | N |
| Antibiotic Resis MDR-Efflux-pump_mexC                  | 23    | 23  | 7.72  | 7.72  | N |
| Antibiotic Resis MDR-Efflux-pump_opmE                  | 29    | 29  | 7.59  | 7.59  | N |
| Antibiotic Resis Macrolide_erm33                       | 18    | 18  | 35.29 | 6.54  | N |
| Antibiotic Resis MDR-transporter_emrE                  | 19    | 15  | 6.02  | 6.02  | N |
| Antibiotic Resis MDR-Efflux-pump_mexQ                  | 55    | 55  | 5.77  | 5.77  | N |
| Antibiotic Resis Involved-in-polymyxin-resistance_pmrB | 45    | 45  | 5.35  | 5.35  | N |
| Antibiotic Resis MDR-Efflux-pump_mexN                  | 50    | 50  | 5.33  | 5.33  | N |
| Antibiotic Resis Efflux-pump_triC                      | 52    | 52  | 5.28  | 5.28  | N |
| Antibiotic Resis MDR-Efflux-pump_oprJ                  | 21    | 21  | 5.24  | 5.24  | N |

|                                                        |        |     |       |       |   |
|--------------------------------------------------------|--------|-----|-------|-------|---|
| Virulence Factc Staphylococcus_aureus_GeneID_SASa064   | 128952 | 418 | 100   | 100   | Y |
| Virulence Factc Staphylococcus_aureus_GeneID_SAS1010   | 94565  | 279 | 100   | 100   | Y |
| Virulence Factc Staphylococcus_aureus_GeneID_SASa011   | 107982 | 409 | 100   | 100   | Y |
| Virulence Factc Staphylococcus_aureus_GENE_1593 Branch | 293    | 15  | 100   | 100   | Y |
| Virulence Factc Staphylococcus_aureus_GeneID_SASa113   | 64218  | 441 | 100   | 100   | Y |
| Virulence Factc Staphylococcus_aureus_GeneID_SAS1009   | 42507  | 452 | 100   | 100   | Y |
| Virulence Factc Staphylococcus_aureus_GENE_isdB        | 8799   | 63  | 100   | 100   | Y |
| Virulence Factc Staphylococcus_aureus_GeneID_SASa064   | 30354  | 469 | 100   | 100   | Y |
| Virulence Factc Staphylococcus_aureus_GeneID_SAS1013   | 47814  | 406 | 99.02 | 99.02 | Y |
| Virulence Factc Staphylococcus_aureus_GeneID_SASd069   | 120543 | 283 | 98.95 | 98.95 | Y |
| Virulence Factc Staphylococcus_aureus_GeneID_SASa011   | 7058   | 737 | 97.88 | 97.88 | Y |



## Staphylococcus aureus cont.

|                                                        |        |     |       |       |   |
|--------------------------------------------------------|--------|-----|-------|-------|---|
| Virulence Factc Staphylococcus_aureus_GeneID_SASa073   | 114382 | 364 | 97.59 | 97.59 | Y |
| Virulence Factc Staphylococcus_aureus_GENE_isdD        | 91976  | 566 | 97.25 | 97.25 | Y |
| Virulence Factc Staphylococcus_aureus_GeneID_SASa064   | 257399 | 463 | 96.66 | 96.66 | Y |
| Virulence Factc Staphylococcus_aureus_GeneID_SAS0117   | 6237   | 521 | 96.66 | 96.66 | Y |
| Virulence Factc Staphylococcus_aureus_GeneID_SASa073   | 107281 | 524 | 96.5  | 96.5  | Y |
| Virulence Factc Staphylococcus_aureus_GeneID_SASa228   | 118521 | 425 | 96.15 | 96.15 | Y |
| Virulence Factc Staphylococcus_aureus_GENE_sspB2       | 46445  | 269 | 88.2  | 94.87 | Y |
| Virulence Factc Staphylococcus_aureus_GeneID_SAS1014   | 169640 | 331 | 94.57 | 94.57 | Y |
| Virulence Factc Staphylococcus_aureus_GeneID_SASa255   | 154830 | 771 | 94.14 | 94.14 | Y |
| Virulence Factc Staphylococcus_aureus_GENE_aur         | 212356 | 749 | 93.98 | 93.98 | Y |
| Virulence Factc Staphylococcus_aureus_GeneID_SASa073   | 130847 | 415 | 93.89 | 93.89 | Y |
| Virulence Factc Staphylococcus_aureus_GeneID_SAS1730   | 6421   | 198 | 93.4  | 93.4  | Y |
| Virulence Factc Staphylococcus_aureus_GENE_set_1582 E  | 3712   | 285 | 95.96 | 93.24 | Y |
| Virulence Factc Staphylococcus_aureus_GeneID_SASa011   | 64538  | 415 | 92.84 | 92.84 | Y |
| Virulence Factc Staphylococcus_aureus_GENE_set_1668 E  | 70766  | 175 | 92.59 | 92.59 | Y |
| Virulence Factc Staphylococcus_aureus_GENE_scn         | 78981  | 184 | 92.46 | 92.46 | Y |
| Virulence Factc Staphylococcus_aureus_GENE_map         | 78731  | 350 | 84.54 | 92.12 | Y |
| Virulence Factc Staphylococcus_aureus_GENE_esxA        | 1824   | 146 | 91.82 | 91.82 | Y |
| Virulence Factc Staphylococcus_aureus_GeneID_SAS0111   | 63804  | 342 | 90.72 | 90.72 | Y |
| Virulence Factc Staphylococcus_aureus_GeneID_SASa012   | 2145   | 233 | 88.26 | 88.26 | Y |
| Virulence Factc Staphylococcus_aureus_GeneID_SAS1008   | 118747 | 836 | 85.05 | 86.04 | Y |
| Virulence Factc Staphylococcus_aureus_GeneID_SASa012   | 93877  | 294 | 85.71 | 85.71 | Y |
| Virulence Factc Staphylococcus_aureus_GENE_cap5L       | 5413   | 20  | 35.09 | 84.87 | Y |
| Virulence Factc Staphylococcus_aureus_GeneID_SAS1015   | 6939   | 132 | 84.61 | 84.61 | Y |
| Virulence Factc Staphylococcus_aureus_GeneID_SAS0122   | 52689  | 199 | 83.97 | 83.97 | Y |
| Virulence Factc Staphylococcus_aureus_GENE_cap5H       | 156161 | 356 | 82.03 | 82.03 | Y |
| Virulence Factc Staphylococcus_aureus_GENE_cap8G       | 24     | 19  | 42.22 | 81.7  | Y |
| Virulence Factc Staphylococcus_aureus_GeneID_SAS0119   | 26116  | 606 | 81.45 | 81.45 | Y |
| Virulence Factc Staphylococcus_aureus_GENE_sak         | 126234 | 281 | 80.98 | 80.98 | Y |
| Virulence Factc Staphylococcus_aureus_GeneID_SAS0115   | 63472  | 357 | 80.77 | 80.77 | Y |
| Virulence Factc Staphylococcus_aureus_GENE_ic_1660 Br. | 69680  | 75  | 70.75 | 80.57 | Y |
| Virulence Factc Staphylococcus_aureus_GENE_cap8D       | 41     | 33  | 15.57 | 80.48 | Y |
| Virulence Factc Staphylococcus_aureus_GeneID_SASa012   | 91554  | 636 | 80    | 80    | Y |

## Staphylococcus aureus cont.

|                                                       |        |      |       |       |   |
|-------------------------------------------------------|--------|------|-------|-------|---|
| Virulence Factc Staphylococcus_aureus_GENE_lukS_PV    | 8196   | 475  | 67.19 | 79.95 | Y |
| Virulence Factc Staphylococcus_aureus_GENE_essA       | 98884  | 293  | 78.98 | 78.98 | Y |
| Virulence Factc Staphylococcus_lentus_GENE_ermC       | 967799 | 263  | 78.98 | 78.98 | Y |
| Virulence Factc Staphylococcus_aureus_GENE_spID       | 3074   | 24   | 26.97 | 78.68 | Y |
| Virulence Factc Staphylococcus_aureus_GENE_hld        | 22182  | 57   | 77.03 | 77.03 | Y |
| Virulence Factc Staphylococcus_aureus_GENE_sdrH       | 165171 | 477  | 73.61 | 73.61 | Y |
| Virulence Factc Staphylococcus_aureus_GENE_nuc        | 8978   | 676  | 71.76 | 71.76 | Y |
| Virulence Factc Staphylococcus_aureus_GENE_cap5J      | 100315 | 658  | 70.83 | 71.14 | Y |
| Virulence Factc Staphylococcus_aureus_GENE_cap5D      | 10684  | 14   | 33.33 | 70.96 | Y |
| Virulence Factc Staphylococcus_aureus_GENE_icaD       | 95502  | 187  | 69.78 | 70.65 | Y |
| Virulence Factc Staphylococcus_aureus_GENE_cap5E      | 358    | 37   | 24.03 | 70.01 | Y |
| Virulence Factc Staphylococcus_aureus_GENE_sspC       | 42711  | 237  | 69.91 | 69.91 | Y |
| Virulence Factc Staphylococcus_aureus_GENE_cap_1631 I | 16355  | 63   | 30.43 | 69.72 | Y |
| Virulence Factc Staphylococcus_aureus_GENE_cap5O      | 26552  | 106  | 51.21 | 69.55 | Y |
| Virulence Factc Staphylococcus_aureus_GENE_cap5P      | 2622   | 78   | 41.49 | 69.23 | Y |
| Virulence Factc Staphylococcus_aureus_GENE_hlb        | 144128 | 590  | 68.61 | 68.61 | Y |
| Virulence Factc Staphylococcus_aureus_GENE_cap5G      | 138    | 39   | 20.1  | 67.74 | Y |
| Virulence Factc Staphylococcus_aureus_GeneID_SAS0121  | 100149 | 354  | 66.92 | 66.92 | Y |
| Virulence Factc Staphylococcus_aureus_GENE_cap5I      | 188642 | 654  | 66.67 | 66.67 | Y |
| Virulence Factc Staphylococcus_aureus_GENE_cap5K      | 223890 | 768  | 65.64 | 65.93 | Y |
| Virulence Factc Staphylococcus_aureus_GENE_esxB       | 57006  | 167  | 65.75 | 65.75 | Y |
| Virulence Factc Staphylococcus_aureus_GENE_esaC       | 51914  | 358  | 64.5  | 64.5  | Y |
| Virulence Factc Staphylococcus_aureus_GeneID_SASa080  | 18217  | 279  | 63.41 | 63.41 | Y |
| Virulence Factc Staphylococcus_aureus_GENE_capC       | 19     | 15   | 14.71 | 63.17 | Y |
| Virulence Factc Staphylococcus_aureus_GENE_cap5F      | 25     | 22   | 16.42 | 62.51 | Y |
| Virulence Factc Staphylococcus_aureus_GENE_icaR       | 100963 | 345  | 61.94 | 61.94 | Y |
| Virulence Factc Staphylococcus_aureus_GENE_set9       | 67     | 37   | 13.81 | 61.44 | Y |
| Virulence Factc Staphylococcus_aureus_GENE_capD       | 97555  | 537  | 47.19 | 60.68 | Y |
| Virulence Factc Staphylococcus_aureus_GENE_SEnt_1536  | 15     | 15   | 26.32 | 60.44 | Y |
| Virulence Factc Staphylococcus_aureus_GENE_spa        | 388207 | 1486 | 58.43 | 59.1  | Y |
| Virulence Factc Staphylococcus_aureus_GI_33390919     | 1863   | 123  | 61.81 | 58.77 | Y |
| Virulence Factc Staphylococcus_aureus_GENE_cap5N      | 1650   | 99   | 39.29 | 57.93 | Y |
| Virulence Factc Staphylococcus_aureus_GENE_esaB       | 44563  | 122  | 56.22 | 56.22 | Y |

## Staphylococcus aureus cont.

|                                                    |         |       |       |       |   |
|----------------------------------------------------|---------|-------|-------|-------|---|
| Virulence Factc Staphylococcus_aureus_GENE_eap     | 131395  | 314   | 54.99 | 54.99 | Y |
| Virulence Factc Staphylococcus_aureus_GENE_capO    | 105     | 38    | 11.24 | 54.81 | Y |
| Virulence Factc Staphylococcus_aureus_GENE_hlgA    | 239927  | 543   | 66.14 | 54.58 | Y |
| Virulence Factc Staphylococcus_aureus_GENE_eap_map | 54665   | 155   | 24.45 | 53.58 | Y |
| Virulence Factc Staphylococcus_aureus_GENE_sdrE    | 244487  | 1553  | 46.43 | 52.87 | Y |
| Virulence Factc Staphylococcus_aureus_GENE_cap1A   | 261     | 21    | 52.5  | 52.5  | Y |
| Virulence Factc Staphylococcus_aureus_GENE_isdF    | 12436   | 30    | 51.72 | 51.72 | Y |
| Virulence Factc Staphylococcus_aureus_GENE_isb     | 63960   | 356   | 39.03 | 49.13 | Y |
| Virulence Factc Staphylococcus_aureus_GENE_lip     | 37336   | 567   | 41.97 | 46.4  | Y |
| Virulence Factc Staphylococcus_aureus_GENE_geh     | 100116  | 1123  | 42.91 | 45.56 | Y |
| Virulence Factc Staphylococcus_aureus_GENE_cap5M   | 44285   | 232   | 48.33 | 44.47 | Y |
| Virulence Factc Staphylococcus_aureus_GENE_atl     | 516584  | 2300  | 43.84 | 43.84 | Y |
| Virulence Factc Staphylococcus_aureus_GENE_icaA    | 93134   | 665   | 43.27 | 43.56 | Y |
| Virulence Factc Staphylococcus_aureus_GENE_splA    | 80579   | 392   | 42.89 | 42.89 | Y |
| Virulence Factc Staphylococcus_aureus_GENE_fib     | 39092   | 135   | 20.15 | 42.1  | Y |
| Virulence Factc Staphylococcus_aureus_GENE_ebh     | 2646725 | 17702 | 41.59 | 41.59 | Y |
| Virulence Factc Staphylococcus_aureus_GENE_ebpS    | 214444  | 873   | 41.51 | 41.51 | Y |
| Virulence Factc Staphylococcus_aureus_GENE_lukF_PV | 99724   | 516   | 28.12 | 40.95 | Y |
| Virulence Factc Staphylococcus_aureus_GENE_hla     | 120250  | 547   | 40.13 | 40.13 | Y |
| Virulence Factc Staphylococcus_aureus_GENE_icaB    | 17016   | 477   | 39    | 39    | N |
| Virulence Factc Staphylococcus_aureus_GENE_essB    | 398308  | 903   | 38.81 | 38.81 | N |
| Virulence Factc Staphylococcus_aureus_GENE_esaA    | 273526  | 1846  | 38.53 | 38.53 | N |
| Virulence Factc Staphylococcus_aureus_GENE_capA    | 42      | 38    | 6.53  | 37.5  | N |
| Virulence Factc Staphylococcus_aureus_GENE_sdrC    | 301209  | 1564  | 29.11 | 36.66 | N |
| Virulence Factc Staphylococcus_aureus_GENE_sdrD    | 520624  | 2217  | 30.53 | 36.18 | N |
| Virulence Factc Staphylococcus_aureus_GENE_essC    | 624297  | 2703  | 36.09 | 36.09 | N |
| Virulence Factc Pseudomonas_aeruginosa_GENE_flhB   | 93      | 93    | 34.44 | 34.44 | N |
| Virulence Factc Staphylococcus_aureus_GENE_clfA    | 388885  | 1879  | 32.53 | 33.92 | N |
| Virulence Factc Staphylococcus_aureus_GENE_clfB    | 310484  | 1557  | 31.54 | 32.68 | N |
| Virulence Factc Pseudomonas_aeruginosa_GENE_flgH   | 63      | 63    | 31.98 | 31.98 | N |
| Virulence Factc Staphylococcus_aureus_GENE_hlgB    | 126891  | 565   | 34.49 | 31.59 | N |
| Virulence Factc Pseudomonas_aeruginosa_GENE_chpD   | 60      | 47    | 31.33 | 31.33 | N |
| Virulence Factc Staphylococcus_aureus_GENE_hlgC    | 130451  | 595   | 31.02 | 31.02 | N |

## Staphylococcus aureus cont.

|                                                     |        |      |       |       |   |
|-----------------------------------------------------|--------|------|-------|-------|---|
| Virulence Factc Staphylococcus_aureus_GENE_cap5C    | 42     | 17   | 17.35 | 30.77 | N |
| Virulence Factc Pseudomonas_aeruginosa_GeneID_PA007 | 95     | 77   | 30.43 | 30.43 | N |
| Virulence Factc Pseudomonas_aeruginosa_GENE_Alg44   | 79     | 79   | 29.92 | 29.92 | N |
| Virulence Factc Pseudomonas_aeruginosa_GENE_algK    | 97     | 86   | 29.86 | 29.86 | N |
| Virulence Factc Staphylococcus_aureus_GENE_sspA     | 86541  | 570  | 36.33 | 29.83 | N |
| Virulence Factc Staphylococcus_aureus_GENE_vwb      | 614929 | 1983 | 29.5  | 29.5  | N |
| Virulence Factc Staphylococcus_aureus_GENE_fnbA     | 393645 | 1216 | 25.34 | 29.3  | N |
| Virulence Factc Staphylococcus_aureus_GENE_spIB     | 49516  | 398  | 27.95 | 28.57 | N |
| Virulence Factc Pseudomonas_aeruginosa_GENE_fimU    | 46     | 46   | 27.88 | 27.88 | N |
| Virulence Factc Pseudomonas_aeruginosa_GENE_phzM    | 82     | 82   | 27.42 | 27.42 | N |
| Virulence Factc Pseudomonas_aeruginosa_GENE_fleN    | 106    | 70   | 27.34 | 27.34 | N |
| Virulence Factc Staphylococcus_aureus_GENE_spIE     | 60197  | 277  | 25.77 | 27.15 | N |
| Virulence Factc Staphylococcus_aureus_GENE_spIC     | 62832  | 436  | 25.86 | 25.86 | N |
| Virulence Factc Pseudomonas_aeruginosa_GENE_xcpY    | 76     | 60   | 25.86 | 25.86 | N |
| Virulence Factc Staphylococcus_aureus_GI_33390948   | 929    | 13   | 7.18  | 24.48 | N |
| Virulence Factc Pseudomonas_aeruginosa_GENE_pilK    | 72     | 57   | 24.46 | 24.46 | N |
| Virulence Factc Staphylococcus_aureus_GENE_hysA     | 356224 | 1076 | 22.05 | 24.4  | N |
| Virulence Factc Pseudomonas_aeruginosa_GENE_rhIL    | 41     | 41   | 24.26 | 24.26 | N |
| Virulence Factc Pseudomonas_aeruginosa_GENE_pilT    | 66     | 66   | 23.57 | 23.57 | N |
| Virulence Factc Pseudomonas_aeruginosa_GENE_fliH    | 46     | 46   | 21.91 | 21.91 | N |
| Virulence Factc Staphylococcus_aureus_GENE_eta      | 106766 | 551  | 21.75 | 21.75 | N |
| Virulence Factc Pseudomonas_aeruginosa_GENE_mucC    | 23     | 23   | 21.49 | 21.49 | N |
| Virulence Factc Pseudomonas_aeruginosa_GENE_fliM    | 65     | 65   | 20.9  | 20.9  | N |
| Virulence Factc Pseudomonas_aeruginosa_GENE_flhF    | 63     | 63   | 20.72 | 20.72 | N |
| Virulence Factc Pseudomonas_aeruginosa_GENE_algD    | 88     | 69   | 20.12 | 20.12 | N |
| Virulence Factc Pseudomonas_aeruginosa_GENE_algI    | 80     | 80   | 19.28 | 19.28 | N |
| Virulence Factc Pseudomonas_aeruginosa_GENE_algZ    | 89     | 57   | 19.19 | 19.19 | N |
| Virulence Factc Pseudomonas_aeruginosa_GeneID_PA008 | 47     | 47   | 19.03 | 19.03 | N |
| Virulence Factc Pseudomonas_aeruginosa_GENE_algX    | 59     | 59   | 17.72 | 17.72 | N |
| Virulence Factc Staphylococcus_aureus_GENE_set17    | 13     | 13   | 17.57 | 17.57 | N |
| Virulence Factc Pseudomonas_aeruginosa_GeneID_PA008 | 19     | 19   | 16.52 | 16.52 | N |
| Virulence Factc Pseudomonas_aeruginosa_GENE_mucB    | 36     | 36   | 15.65 | 15.65 | N |
| Virulence Factc Pseudomonas_aeruginosa_GeneID_PA007 | 57     | 57   | 15.57 | 15.57 | N |

Staphylococcus aureus cont.

|                                                       |     |    |       |       |   |
|-------------------------------------------------------|-----|----|-------|-------|---|
| Virulence Factc Staphylococcus_aureus_GENE_SEntK      | 10  | 10 | 11.63 | 14.66 | N |
| Virulence Factc Pseudomonas_aeruginosa_GENE_fliN      | 19  | 19 | 13.67 | 13.67 | N |
| Virulence Factc Pseudomonas_aeruginosa_GeneID_PA008   | 56  | 50 | 13.59 | 13.59 | N |
| Virulence Factc Pseudomonas_aeruginosa_GeneID_PAP47   | 31  | 31 | 13.48 | 13.48 | N |
| Virulence Factc Pseudomonas_aeruginosa_GeneID_PA008   | 60  | 60 | 13.3  | 13.3  | N |
| Virulence Factc Pseudomonas_aeruginosa_GENE_piIX      | 23  | 23 | 13.14 | 13.14 | N |
| Virulence Factc Pseudomonas_aeruginosa_GENE_fliG      | 35  | 35 | 12.73 | 12.73 | N |
| Virulence Factc Staphylococcus_aureus_GENE_set13      | 48  | 42 | 11.8  | 11.8  | N |
| Virulence Factc Pseudomonas_aeruginosa_GENE_fliI      | 38  | 38 | 11.66 | 11.66 | N |
| Virulence Factc Pseudomonas_aeruginosa_GeneID_PA007   | 18  | 18 | 11.25 | 11.25 | N |
| Virulence Factc Pseudomonas_aeruginosa_GENE_lasA      | 34  | 34 | 11.11 | 11.11 | N |
| Virulence Factc Staphylococcus_aureus_GENE_set12      | 37  | 32 | 10.85 | 10.85 | N |
| Virulence Factc Pseudomonas_aeruginosa_GENE_pchG      | 28  | 28 | 10.65 | 10.65 | N |
| Virulence Factc Pseudomonas_aeruginosa_GENE_chpC      | 12  | 12 | 9.6   | 9.6   | N |
| Virulence Factc Pseudomonas_aeruginosa_GeneID_PA007   | 27  | 27 | 9.57  | 9.57  | N |
| Virulence Factc Staphylococcus_aureus_GENE_lukD       | 79  | 16 | 9.52  | 9.42  | N |
| Virulence Factc Pseudomonas_aeruginosa_GENE_pchR      | 19  | 19 | 8.76  | 8.76  | N |
| Virulence Factc Pseudomonas_aeruginosa_GENE_exoT      | 34  | 33 | 8.42  | 8.42  | N |
| Virulence Factc Pseudomonas_aeruginosa_GENE_pchA      | 28  | 28 | 8.12  | 8.12  | N |
| Virulence Factc Pseudomonas_aeruginosa_GENE_fptA      | 42  | 42 | 8.08  | 8.08  | N |
| Virulence Factc Pseudomonas_aeruginosa_GENE_piIB      | 46  | 46 | 7.85  | 7.85  | N |
| Virulence Factc Staphylococcus_aureus_GENE_SEnt_1655  | 246 | 40 | 18.26 | 7.42  | N |
| Virulence Factc Pseudomonas_aeruginosa_GENE_waaA      | 41  | 21 | 7.42  | 7.42  | N |
| Virulence Factc Pseudomonas_aeruginosa_GeneID_PA008   | 36  | 36 | 7.38  | 7.38  | N |
| Virulence Factc Pseudomonas_aeruginosa_GeneID_PA008   | 15  | 15 | 6.98  | 6.98  | N |
| Virulence Factc Pseudomonas_aeruginosa_GENE_fliF      | 72  | 36 | 6.94  | 6.94  | N |
| Virulence Factc Pseudomonas_aeruginosa_GENE_xcpP      | 13  | 13 | 6.88  | 6.88  | N |
| Virulence Factc Staphylococcus_aureus_GENE_set_1611 E | 14  | 14 | 7.22  | 6.76  | N |
| Virulence Factc Pseudomonas_aeruginosa_GENE_algJ      | 19  | 19 | 6.76  | 6.76  | N |
| Virulence Factc Pseudomonas_aeruginosa_GENE_algE      | 23  | 23 | 6.53  | 6.53  | N |
| Virulence Factc Pseudomonas_aeruginosa_GENE_algA      | 28  | 28 | 6.44  | 6.44  | N |
| Virulence Factc Pseudomonas_aeruginosa_GENE_pchD      | 23  | 23 | 6.1   | 6.1   | N |
| Virulence Factc Pseudomonas_aeruginosa_GENE_xcpQ      | 26  | 26 | 5.68  | 5.68  | N |

Staphylococcus aureus cont.

|                                                  |    |    |      |      |   |
|--------------------------------------------------|----|----|------|------|---|
| Virulence Factc Pseudomonas_aeruginosa_GENE_fliC | 18 | 18 | 5.66 | 5.66 | N |
| Virulence Factc Pseudomonas_aeruginosa_GENE_aprA | 33 | 23 | 5.65 | 5.65 | N |
| Virulence Factc Pseudomonas_aeruginosa_GENE_xcpR | 18 | 18 | 5.59 | 5.59 | N |
| Virulence Factc Pseudomonas_aeruginosa_GENE_ppkA | 28 | 28 | 5.51 | 5.51 | N |
| Virulence Factc Pseudomonas_aeruginosa_GENE_pilQ | 33 | 33 | 5.47 | 5.47 | N |
| Virulence Factc Pseudomonas_aeruginosa_GENE_flgJ | 16 | 16 | 5.46 | 5.46 | N |
| Virulence Factc Pseudomonas_aeruginosa_GENE_fleQ | 22 | 22 | 5.33 | 5.31 | N |
| Virulence Factc Pseudomonas_aeruginosa_GENE_algG | 22 | 22 | 5.2  | 5.2  | N |
| Virulence Factc Pseudomonas_aeruginosa_GENE_exoS | 21 | 21 | 5    | 5    | N |

Pseudomonas aeruginosa control.

| Database | Organism                                     | Unique Matches Frequency | Unique Matches | % Unique Matches | % Total Matches | Relative Abundance | Above Threshold |
|----------|----------------------------------------------|--------------------------|----------------|------------------|-----------------|--------------------|-----------------|
| Bacteria | Pseudomonas_aeruginosa_strain_AZPAE14876     | 4188                     | 111            | 4.53             | 4.53            | 91.61              | Y               |
| Bacteria | Pseudomonas_otitidis                         | 45                       | 32             | 1.95             | 1.95            | 5.78               | Y               |
| Bacteria | Pseudomonas_sp_2_1_26                        | 92                       | 79             | 1.04             | 1.04            | 2.229              | Y               |
| Bacteria | Ralstonia_pickettii_12D                      | 1769                     | 1611           | 1.87             | 1.86            | 0.1848             | Y               |
| Bacteria | Propionibacterium_20956 Branch               | 30                       | 30             | 0.2              | 0.19            | 0.06475            | Y               |
| Bacteria | Leifsonia_aquatica_ATCC_14665                | 1517                     | 1147           | 0.65             | 0.66            | 0.06057            | N               |
| Bacteria | Ralstonia_24678 Branch                       | 40                       | 33             | 0.24             | 0.24            | 0.01137            | N               |
| Bacteria | Streptomyces_pluripotens_strain_MUSC_137     | 43                       | 43             | 0.13             | 0.08            | 0.006152           | N               |
| Bacteria | Pseudomonas_thermotolerans_39784 Branch      | 134                      | 101            | 0.07             | 0.07            | 0.005385           | N               |
| Bacteria | Streptococcus_mutans_2662 Branch             | 17                       | 17             | 0.14             | 0.14            | 0.005484           | N               |
| Bacteria | Lactococcus_lactis_subsp_cremoris_4115 Branc | 28                       | 27             | 0.09             | 0.08            | 0.004413           | N               |
| Bacteria | Pseudomonadaceae_Family_4039_40175 Branch    | 61                       | 50             | 0.04             | 0.04            | 0.00403            | N               |
| Bacteria | Pseudomonas_alcaligenes_39473 Branch         | 112                      | 75             | 0.04             | 0.04            | 0.00333            | N               |
| Bacteria | alpha_proteobacterium_SCGC_AAA027_C06        | 17                       | 17             | 0.09             | 0.16            | 0.003399           | N               |
| Bacteria | Pseudomonas_denitrificans_ATCC_13867         | 116                      | 96             | 0.05             | 0.05            | 0.002929           | N               |
| Bacteria | Pseudomonas_knackmussii_B13                  | 119                      | 92             | 0.05             | 0.05            | 0.002829           | N               |
| Bacteria | Pseudomonas_39662 Branch                     | 28                       | 21             | 0.03             | 0.05            | 0.002029           | N               |
| Bacteria | Pseudomonas_azotifigens_DSM_17556            | 99                       | 69             | 0.04             | 0.04            | 0.002111           | N               |
| Bacteria | Synechococcus_sp_CB0101                      | 57                       | 57             | 0.04             | 0.04            | 0.002035           | N               |
| Bacteria | Pseudomonas_nitroreducens_TX1                | 84                       | 66             | 0.03             | 0.05            | 0.001879           | N               |
| Bacteria | Pseudomonas_resinovorans_NBRC_106553         | 79                       | 66             | 0.03             | 0.03            | 0.001846           | N               |
| Bacteria | Azotobacter_chroococcum_NCIMB_8003           | 86                       | 64             | 0.03             | 0.03            | 0.00184            | N               |
| Bacteria | Pseudomonas_39733 Branch                     | 37                       | 25             | 0.02             | 0.02            | 0.001403           | N               |
| Bacteria | Leifsonia_xyli_subsp_cynodontis_DSM_46306    | 60                       | 53             | 0.03             | 0.05            | 0.001658           | N               |
| Bacteria | Pseudomonas_39821 Branch                     | 37                       | 31             | 0.02             | 0.02            | 0.001341           | N               |
| Bacteria | Acidovorax_sp_JS42                           | 151                      | 21             | 0.02             | 0.04            | 0.001645           | N               |
| Bacteria | Pseudomonas_mendocina_39458 Branch           | 18                       | 16             | 0.01             | 0.01            | 0.00135            | N               |
| Bacteria | Pseudomonas_pseudoalcaligenes_KF707          | 78                       | 52             | 0.03             | 0.03            | 0.001479           | N               |
| Bacteria | Pseudomonas_fulva_12_X                       | 36                       | 32             | 0.03             | 0.02            | 0.001217           | N               |

Pseudomonas aeruginosa cont.

|       |                                      |       |      |       |       |         |   |
|-------|--------------------------------------|-------|------|-------|-------|---------|---|
| Virus | Pseudomonas_phage_Pf1                | 68101 | 2400 | 93.46 | 93.46 | 95.51   | Y |
| Virus | Myoviridae_Family_5_1127_7583 Branch | 112   | 68   | 28.94 | 28.94 | 4.454   | Y |
| Virus | Shigella_phage_Sfl_7665 Branch       | 32    | 32   | 1.37  | 0.61  | 0.03672 | N |

Respiratory Virus no calls detected above threshold

Fungi no calls detected above threshold

Protist no calls detected above threshold

|                       |                                  |       |     |       |       |  |   |
|-----------------------|----------------------------------|-------|-----|-------|-------|--|---|
| Antibiotic Resistance | Repressor-of-efflux-complex_nfxB | 7154  | 178 | 100   | 100   |  | Y |
| Antibiotic Resistance | Sensor-protein_soxR              | 13199 | 124 | 100   | 100   |  | Y |
| Antibiotic Resistance | MDR-Efflux-pump_mexG             | 17413 | 130 | 100   | 100   |  | Y |
| Antibiotic Resistance | Phenicol_catB7                   | 10450 | 192 | 100   | 100   |  | Y |
| Antibiotic Resistance | MDR-Efflux-pump_oprN             | 31524 | 378 | 100   | 100   |  | Y |
| Antibiotic Resistance | Outer-membrane-factor_oprM       | 22427 | 415 | 100   | 100   |  | Y |
| Antibiotic Resistance | Efflux-pump_triA                 | 21657 | 306 | 98.39 | 98.39 |  | Y |
| Antibiotic Resistance | MDR-Efflux-pump_mexC             | 22619 | 292 | 97.99 | 97.99 |  | Y |
| Antibiotic Resistance | Efflux-pump_triB                 | 15347 | 272 | 97.84 | 97.84 |  | Y |
| Antibiotic Resistance | Repressor_nalD                   | 7710  | 204 | 96.68 | 96.68 |  | Y |
| Antibiotic Resistance | MDR-Efflux-pump_mexN             | 51788 | 906 | 96.59 | 96.59 |  | Y |
| Antibiotic Resistance | Efflux-pump_triC                 | 41560 | 951 | 96.55 | 96.55 |  | Y |
| Antibiotic Resistance | MDR-Efflux-pump_mexI             | 58333 | 899 | 96.36 | 96.36 |  | Y |
| Antibiotic Resistance | Efflux-pump_amrB                 | 2173  | 65  | 82.28 | 95.71 |  | Y |



Pseudomonas aeruginosa cont.

|                                                                         |       |     |       |       |   |
|-------------------------------------------------------------------------|-------|-----|-------|-------|---|
| Antibiotic Resistance MDR-Efflux-pump_mexJ                              | 14780 | 271 | 95.09 | 95.09 | Y |
| Antibiotic Resistance MDR-Efflux-pump_oprJ                              | 41966 | 380 | 94.76 | 94.76 | Y |
| Antibiotic Resistance Aminoglycoside_aac3_la                            | 4043  | 56  | 84.85 | 94.62 | Y |
| Antibiotic Resistance MDR-Efflux-pump_opmD                              | 32487 | 340 | 93.92 | 93.92 | Y |
| Antibiotic Resistance Inner-membrane-transporter_mexF                   | 69556 | 958 | 93.74 | 93.74 | Y |
| Antibiotic Resistance MDR-Efflux-pump_opmE                              | 29100 | 356 | 93.19 | 93.19 | Y |
| Antibiotic Resistance Repressor-of-mexJK_mexL                           | 10400 | 178 | 91.75 | 91.75 | Y |
| Antibiotic Resistance MDR-Efflux-pump_mexD                              | 51503 | 953 | 90.16 | 90.16 | Y |
| Antibiotic Resistance Repressor_nalC                                    | 3532  | 173 | 90.1  | 90.1  | Y |
| Antibiotic Resistance MDR-Efflux-pump_mexB                              | 37061 | 917 | 89.99 | 89.99 | Y |
| Antibiotic Resistance MDR-Efflux-pump_mexE                              | 2344  | 317 | 89.8  | 89.8  | Y |
| Antibiotic Resistance MDR-Efflux-pump_mexM                              | 13455 | 287 | 89.69 | 89.69 | Y |
| Antibiotic Resistance MDR-Efflux-pump_mexH                              | 6004  | 284 | 89.59 | 89.59 | Y |
| Antibiotic Resistance Efflux-pump_amrA                                  | 6895  | 53  | 91.38 | 89.42 | Y |
| Antibiotic Resistance MDR-Efflux-pump_mexQ                              | 45078 | 852 | 89.4  | 89.4  | Y |
| Antibiotic Resistance Suppressor-of-MexT_mexS                           | 12255 | 271 | 88.85 | 88.85 | Y |
| Antibiotic Resistance MDR-Efflux-pump_opmH                              | 11924 | 360 | 87.59 | 87.59 | Y |
| Antibiotic Resistance Beta-lactam-resistance_bla 244_1197_740 Branch    | 8073  | 225 | 86.54 | 86.54 | Y |
| Antibiotic Resistance Membrane-fusion-protein_mexA                      | 15131 | 290 | 82.62 | 82.62 | Y |
| Antibiotic Resistance MDR-Efflux-pump_mexP                              | 6601  | 249 | 77.81 | 77.81 | Y |
| Antibiotic Resistance Aminoglycoside_aac1                               | 19    | 13  | 25    | 77.33 | Y |
| Antibiotic Resistance Aminoglycoside_aph3'_Ib                           | 11440 | 136 | 63.85 | 63.85 | Y |
| Antibiotic Resistance Beta-lactam-resistance_blaOXA_50                  | 15759 | 253 | 62.31 | 62.31 | Y |
| Antibiotic Resistance Involved-in-polymyxin-resistance_pmrB             | 20535 | 397 | 47.21 | 47.21 | Y |
| Antibiotic Resistance Aminoglycoside_aph3'_Ib                           | 272   | 139 | 44.13 | 44.13 | Y |
| Antibiotic Resistance polymyxin-and-cationic-antimicrobial-peptides_arm | 22195 | 548 | 38.89 | 38.89 | N |
| Antibiotic Resistance Involved-in-polymyxin-resistance_pmrA             | 20198 | 173 | 38.88 | 38.88 | N |
| Antibiotic Resistance Sensor-protein_phoQ                               | 15856 | 371 | 37.25 | 37.25 | N |
| Antibiotic Resistance MDR-transporter_emrE                              | 8466  | 92  | 36.95 | 36.95 | N |
| Antibiotic Resistance Repressor-of-efflux-complex_phoP                  | 4759  | 178 | 35.04 | 35.04 | N |
| Antibiotic Resistance MDR-transporter_emrY                              | 143   | 143 | 18.79 | 18.79 | N |
| Antibiotic Resistance MDR-Efflux-pump_mdtE                              | 112   | 83  | 18.36 | 18.36 | N |
| Antibiotic Resistance Regulator_cpxR                                    | 55    | 45  | 15.36 | 15.36 | N |

Pseudomonas aeruginosa cont.

|                       |                                       |     |     |       |       |   |
|-----------------------|---------------------------------------|-----|-----|-------|-------|---|
| Antibiotic Resistance | Repressor-for-mdr-efflux-pump_emrR    | 30  | 30  | 13.22 | 13.22 | N |
| Antibiotic Resistance | Involved-in-polymyxin-resistance_pmrF | 53  | 53  | 12.77 | 12.77 | N |
| Antibiotic Resistance | Inner-membrane-transporter_acrF       | 190 | 152 | 11.5  | 11.5  | N |
| Antibiotic Resistance | MDR-Efflux-pump_mdtD                  | 64  | 57  | 10.07 | 10.07 | N |
| Antibiotic Resistance | MDR-protein_mdtH                      | 70  | 43  | 9.09  | 9.09  | N |
| Antibiotic Resistance | Beta-lactam-resistance_blaAmpC        | 110 | 80  | 8.97  | 8.97  | N |
| Antibiotic Resistance | Transporter-for-efflux-complex_mdtF   | 136 | 110 | 8.59  | 8.59  | N |
| Antibiotic Resistance | Membrane-fusion-protein_emrK          | 95  | 43  | 8.48  | 8.48  | N |
| Antibiotic Resistance | Involved-in-polymyxin-resistance_pmrE | 44  | 44  | 8.02  | 8.02  | N |
| Antibiotic Resistance | Involved-in-polymyxin-resistance_pmrC | 55  | 55  | 7.7   | 7.7   | N |
| Antibiotic Resistance | Beta-lactam_pbp4_Ecoli                | 35  | 35  | 6.54  | 6.54  | N |
| Antibiotic Resistance | MDR-transporter_mdtK                  | 72  | 36  | 6.44  | 6.44  | N |

|                  |                                      |       |     |     |     |   |
|------------------|--------------------------------------|-------|-----|-----|-----|---|
| Virulence Factor | Pseudomonas_aeruginosa_GENE_flhB     | 35386 | 270 | 100 | 100 | Y |
| Virulence Factor | Pseudomonas_aeruginosa_GENE_fleN     | 29275 | 256 | 100 | 100 | Y |
| Virulence Factor | Pseudomonas_aeruginosa_GENE_fliH     | 25109 | 210 | 100 | 100 | Y |
| Virulence Factor | Pseudomonas_aeruginosa_GENE_fliR     | 24642 | 214 | 100 | 100 | Y |
| Virulence Factor | Pseudomonas_aeruginosa_GeneID_PA0089 | 25451 | 247 | 100 | 100 | Y |
| Virulence Factor | Pseudomonas_aeruginosa_GENE_waaA     | 25646 | 283 | 100 | 100 | Y |
| Virulence Factor | Pseudomonas_aeruginosa_GENE_xcpY     | 23373 | 232 | 100 | 100 | Y |
| Virulence Factor | Pseudomonas_aeruginosa_GENE_phzM     | 26100 | 299 | 100 | 100 | Y |
| Virulence Factor | Pseudomonas_aeruginosa_GENE_Alg44    | 20998 | 264 | 100 | 100 | Y |
| Virulence Factor | Pseudomonas_aeruginosa_GENE_algJ     | 20079 | 281 | 100 | 100 | Y |
| Virulence Factor | Pseudomonas_aeruginosa_GENE_algD     | 21891 | 343 | 100 | 100 | Y |
| Virulence Factor | Pseudomonas_aeruginosa_GENE_chpD     | 14904 | 150 | 100 | 100 | Y |
| Virulence Factor | Pseudomonas_aeruginosa_GeneID_PA0076 | 15173 | 160 | 100 | 100 | Y |
| Virulence Factor | Pseudomonas_aeruginosa_GENE_fliM     | 19788 | 311 | 100 | 100 | Y |
| Virulence Factor | Pseudomonas_aeruginosa_GENE_pchC     | 13316 | 163 | 100 | 100 | Y |
| Virulence Factor | Pseudomonas_aeruginosa_GENE_fliO     | 9464  | 79  | 100 | 100 | Y |
| Virulence Factor | Pseudomonas_aeruginosa_GENE_piIN     | 12824 | 155 | 100 | 100 | Y |
| Virulence Factor | Pseudomonas_aeruginosa_GeneID_PA0087 | 10697 | 115 | 100 | 100 | Y |

Pseudomonas aeruginosa cont.

|                  |                                      |       |     |       |       |   |
|------------------|--------------------------------------|-------|-----|-------|-------|---|
| Virulence Factor | Pseudomonas_aeruginosa_GENE_flgC     | 9836  | 128 | 100   | 100   | Y |
| Virulence Factor | Pseudomonas_aeruginosa_GENE_fimU     | 10556 | 165 | 100   | 100   | Y |
| Virulence Factor | Pseudomonas_aeruginosa_GENE_hcp1     | 9094  | 123 | 100   | 100   | Y |
| Virulence Factor | Pseudomonas_aeruginosa_GENE_xcpP     | 10658 | 189 | 100   | 100   | Y |
| Virulence Factor | Pseudomonas_aeruginosa_GeneID_PA0073 | 9826  | 166 | 100   | 100   | Y |
| Virulence Factor | Pseudomonas_aeruginosa_GENE_flgF     | 8683  | 236 | 100   | 100   | Y |
| Virulence Factor | Pseudomonas_aeruginosa_GENE_algF     | 6029  | 135 | 100   | 100   | Y |
| Virulence Factor | Pseudomonas_aeruginosa_GENE_pilI     | 4713  | 134 | 100   | 100   | Y |
| Virulence Factor | Pseudomonas_aeruginosa_GENE_xcpV     | 3204  | 100 | 100   | 100   | Y |
| Virulence Factor | Pseudomonas_aeruginosa_GENE_algQ     | 1112  | 133 | 100   | 100   | Y |
| Virulence Factor | Pseudomonas_aeruginosa_GENE_pilH     | 804   | 109 | 100   | 100   | Y |
| Virulence Factor | Pseudomonas_aeruginosa_GENE_pilG     | 680   | 124 | 100   | 100   | Y |
| Virulence Factor | Pseudomonas_aeruginosa_GENE_algI     | 30332 | 414 | 99.76 | 99.76 | Y |
| Virulence Factor | Pseudomonas_aeruginosa_GeneID_PA0078 | 27874 | 281 | 99.65 | 99.65 | Y |
| Virulence Factor | Pseudomonas_aeruginosa_GENE_algK     | 19517 | 287 | 99.65 | 99.65 | Y |
| Virulence Factor | Pseudomonas_aeruginosa_GENE_fliG     | 6414  | 274 | 99.64 | 99.64 | Y |
| Virulence Factor | Pseudomonas_aeruginosa_GENE_pilE     | 5448  | 129 | 99.23 | 99.23 | Y |
| Virulence Factor | Pseudomonas_aeruginosa_GENE_xcpT     | 572   | 118 | 99.16 | 99.16 | Y |
| Virulence Factor | Pseudomonas_aeruginosa_GENE_flgD     | 1109  | 191 | 98.96 | 98.96 | Y |
| Virulence Factor | Pseudomonas_aeruginosa_GENE_pilK     | 12598 | 230 | 98.71 | 98.71 | Y |
| Virulence Factor | Pseudomonas_aeruginosa_GeneID_PA0075 | 1522  | 173 | 98.29 | 98.29 | Y |
| Virulence Factor | Pseudomonas_aeruginosa_GENE_mucB     | 11763 | 226 | 98.26 | 98.26 | Y |
| Virulence Factor | Pseudomonas_aeruginosa_GENE_algA     | 32454 | 427 | 98.16 | 98.16 | Y |
| Virulence Factor | Pseudomonas_aeruginosa_GENE_pchE     | 22284 | 361 | 98.1  | 98.1  | Y |
| Virulence Factor | Pseudomonas_aeruginosa_GeneID_PA0081 | 18093 | 361 | 98.1  | 98.1  | Y |
| Virulence Factor | Pseudomonas_aeruginosa_GENE_icmF1    | 17690 | 497 | 98.03 | 98.03 | Y |
| Virulence Factor | Pseudomonas_aeruginosa_GENE_pvdS     | 971   | 142 | 97.93 | 97.93 | Y |
| Virulence Factor | Pseudomonas_aeruginosa_GENE_pilJ     | 35546 | 555 | 97.88 | 97.88 | Y |
| Virulence Factor | Pseudomonas_aeruginosa_GENE_algG     | 26699 | 414 | 97.87 | 97.87 | Y |
| Virulence Factor | Pseudomonas_aeruginosa_GENE_pchH     | 42674 | 394 | 97.77 | 97.77 | Y |
| Virulence Factor | Pseudomonas_aeruginosa_GENE_clpV1    | 10686 | 384 | 97.71 | 97.71 | Y |
| Virulence Factor | Pseudomonas_aeruginosa_GeneID_PA0082 | 29402 | 249 | 97.65 | 97.65 | Y |
| Virulence Factor | Pseudomonas_aeruginosa_GENE_pilC     | 32439 | 540 | 97.65 | 97.65 | Y |

Pseudomonas aeruginosa cont.

|                  |                                      |       |     |       |       |   |
|------------------|--------------------------------------|-------|-----|-------|-------|---|
| Virulence Factor | Pseudomonas_aeruginosa_GENE_algZ     | 32191 | 290 | 97.64 | 97.64 | Y |
| Virulence Factor | Pseudomonas_aeruginosa_GENE_flgI     | 14113 | 290 | 97.64 | 97.64 | Y |
| Virulence Factor | Pseudomonas_aeruginosa_GENE_waaC     | 23998 | 240 | 97.56 | 97.56 | Y |
| Virulence Factor | Pseudomonas_aeruginosa_GENE_lasB     | 13146 | 318 | 97.55 | 97.55 | Y |
| Virulence Factor | Pseudomonas_aeruginosa_GENE_fimV     | 37193 | 569 | 97.43 | 97.43 | Y |
| Virulence Factor | Pseudomonas_aeruginosa_GENE_pchB     | 5211  | 75  | 97.4  | 97.4  | Y |
| Virulence Factor | Pseudomonas_aeruginosa_GeneID_PA0079 | 26718 | 356 | 97.27 | 97.27 | Y |
| Virulence Factor | Pseudomonas_aeruginosa_GENE_pilU     | 19175 | 321 | 97.27 | 97.27 | Y |
| Virulence Factor | Pseudomonas_aeruginosa_GENE_xcpS     | 11211 | 278 | 97.2  | 97.2  | Y |
| Virulence Factor | Pseudomonas_aeruginosa_GENE_xcpZ     | 1677  | 101 | 97.11 | 97.11 | Y |
| Virulence Factor | Pseudomonas_aeruginosa_GENE_waaF     | 6830  | 267 | 97.09 | 97.09 | Y |
| Virulence Factor | Pseudomonas_aeruginosa_GENE_pchF     | 23997 | 395 | 97.05 | 97.05 | Y |
| Virulence Factor | Pseudomonas_aeruginosa_GENE_fliQ     | 345   | 65  | 97.01 | 97.01 | Y |
| Virulence Factor | Pseudomonas_aeruginosa_GENE_pilR     | 3175  | 388 | 97    | 97    | Y |
| Virulence Factor | Pseudomonas_aeruginosa_GeneID_PA0072 | 18975 | 245 | 96.84 | 96.84 | Y |
| Virulence Factor | Pseudomonas_aeruginosa_GENE_pchA     | 16252 | 331 | 95.94 | 95.94 | Y |
| Virulence Factor | Pseudomonas_aeruginosa_GENE_fleQ     | 28979 | 396 | 95.88 | 95.89 | Y |
| Virulence Factor | Pseudomonas_aeruginosa_GENE_xcpQ     | 39052 | 439 | 95.85 | 95.85 | Y |
| Virulence Factor | Pseudomonas_aeruginosa_GENE_fliJ     | 2447  | 91  | 95.79 | 95.79 | Y |
| Virulence Factor | Pseudomonas_aeruginosa_GENE_algR     | 9143  | 203 | 95.75 | 95.75 | Y |
| Virulence Factor | Pseudomonas_aeruginosa_GENE_algP     | 2178  | 89  | 95.7  | 95.7  | Y |
| Virulence Factor | Pseudomonas_aeruginosa_GENE_flgG     | 6059  | 233 | 95.49 | 95.49 | Y |
| Virulence Factor | Pseudomonas_aeruginosa_GENE_algB     | 20118 | 352 | 95.13 | 95.15 | Y |
| Virulence Factor | Pseudomonas_aeruginosa_GENE_aprA     | 14323 | 387 | 95.09 | 95.09 | Y |
| Virulence Factor | Pseudomonas_aeruginosa_GENE_phzS     | 4620  | 285 | 95    | 95    | Y |
| Virulence Factor | Pseudomonas_aeruginosa_GENE_flgH     | 24116 | 187 | 94.92 | 94.92 | Y |
| Virulence Factor | Pseudomonas_aeruginosa_GENE_rhlB     | 10687 | 335 | 94.9  | 94.9  | Y |
| Virulence Factor | Pseudomonas_aeruginosa_GENE_pilY2    | 4101  | 93  | 94.9  | 94.9  | Y |
| Virulence Factor | Pseudomonas_aeruginosa_GENE_algE     | 18185 | 334 | 94.89 | 94.89 | Y |
| Virulence Factor | Pseudomonas_aeruginosa_GENE_pilX     | 15741 | 166 | 94.86 | 94.86 | Y |
| Virulence Factor | Pseudomonas_aeruginosa_GENE_waaP     | 6278  | 221 | 94.85 | 94.85 | Y |
| Virulence Factor | Pseudomonas_aeruginosa_GENE_toxA     | 33332 | 451 | 94.55 | 94.55 | Y |
| Virulence Factor | Pseudomonas_aeruginosa_GENE_pilV     | 7718  | 164 | 94.25 | 94.25 | Y |

Pseudomonas aeruginosa cont.

|                  |                                      |       |     |       |       |   |
|------------------|--------------------------------------|-------|-----|-------|-------|---|
| Virulence Factor | Pseudomonas_aeruginosa_GENE_fliN     | 5494  | 131 | 94.24 | 94.24 | Y |
| Virulence Factor | Pseudomonas_aeruginosa_GENE_fliF     | 25015 | 489 | 94.22 | 94.22 | Y |
| Virulence Factor | Pseudomonas_aeruginosa_GENE_xcpX     | 5685  | 178 | 94.18 | 94.18 | Y |
| Virulence Factor | Pseudomonas_aeruginosa_GENE_fliH     | 15755 | 284 | 93.42 | 93.42 | Y |
| Virulence Factor | Pseudomonas_aeruginosa_GENE_mucA     | 5081  | 141 | 93.38 | 93.38 | Y |
| Virulence Factor | Pseudomonas_aeruginosa_GENE_chpE     | 8367  | 132 | 92.96 | 92.96 | Y |
| Virulence Factor | Pseudomonas_aeruginosa_GENE_xcpR     | 6257  | 296 | 91.93 | 91.93 | Y |
| Virulence Factor | Pseudomonas_aeruginosa_GENE_ExcC     | 14262 | 113 | 91.87 | 91.87 | Y |
| Virulence Factor | Pseudomonas_aeruginosa_GENE_xcpU     | 10249 | 123 | 91.79 | 91.79 | Y |
| Virulence Factor | Pseudomonas_aeruginosa_GENE_pchI     | 17916 | 290 | 91.77 | 91.77 | Y |
| Virulence Factor | Pseudomonas_aeruginosa_GENE_pchR     | 2805  | 199 | 91.71 | 91.71 | Y |
| Virulence Factor | Pseudomonas_aeruginosa_GENE_lasR     | 925   | 199 | 91.71 | 91.71 | Y |
| Virulence Factor | Pseudomonas_aeruginosa_GENE_fliA     | 34491 | 573 | 91.68 | 91.68 | Y |
| Virulence Factor | Pseudomonas_aeruginosa_GENE_fleR     | 6851  | 359 | 91.58 | 91.58 | Y |
| Virulence Factor | Pseudomonas_aeruginosa_GENE_lasI     | 6441  | 184 | 91.54 | 91.54 | Y |
| Virulence Factor | Pseudomonas_aeruginosa_GENE_pilM     | 10010 | 259 | 91.52 | 91.52 | Y |
| Virulence Factor | Pseudomonas_aeruginosa_GENE_pilO     | 1038  | 181 | 91.41 | 91.41 | Y |
| Virulence Factor | Pseudomonas_aeruginosa_GENE_algL     | 8039  | 244 | 91.39 | 91.39 | Y |
| Virulence Factor | Pseudomonas_aeruginosa_GeneID_PA0088 | 9679  | 446 | 91.39 | 91.39 | Y |
| Virulence Factor | Pseudomonas_aeruginosa_GENE_pilP     | 6879  | 148 | 90.24 | 90.24 | Y |
| Virulence Factor | Pseudomonas_aeruginosa_GENE_fliP     | 10677 | 191 | 90.09 | 90.09 | Y |
| Virulence Factor | Pseudomonas_aeruginosa_GENE_Alg8     | 20966 | 378 | 90    | 90    | Y |
| Virulence Factor | Pseudomonas_aeruginosa_GENE_chpB     | 3288  | 243 | 90    | 90    | Y |
| Virulence Factor | Pseudomonas_aeruginosa_GENE_vgrG1    | 33424 | 373 | 89.88 | 89.88 | Y |
| Virulence Factor | Pseudomonas_aeruginosa_GENE_pilF     | 1973  | 201 | 89.73 | 89.73 | Y |
| Virulence Factor | Pseudomonas_aeruginosa_GENE_mucC     | 6222  | 96  | 89.72 | 89.72 | Y |
| Virulence Factor | Pseudomonas_aeruginosa_GENE_chpC     | 8152  | 112 | 89.6  | 89.6  | Y |
| Virulence Factor | Pseudomonas_aeruginosa_GeneID_PA0084 | 37714 | 403 | 89.36 | 89.36 | Y |
| Virulence Factor | Pseudomonas_aeruginosa_GENE_pchG     | 17638 | 235 | 89.35 | 89.35 | Y |
| Virulence Factor | Pseudomonas_aeruginosa_GeneID_PA0086 | 7053  | 192 | 89.3  | 89.3  | Y |
| Virulence Factor | Pseudomonas_aeruginosa_GENE_rhIA     | 12373 | 232 | 89.23 | 89.23 | Y |
| Virulence Factor | Pseudomonas_aeruginosa_GENE_exoS     | 9594  | 371 | 88.33 | 88.33 | Y |
| Virulence Factor | Pseudomonas_aeruginosa_GENE_pilD     | 17286 | 224 | 88.19 | 88.19 | Y |

Pseudomonas aeruginosa cont.

|                  |                                        |       |     |       |       |   |
|------------------|----------------------------------------|-------|-----|-------|-------|---|
| Virulence Factor | Pseudomonas_aeruginosa_GENE_flgJ       | 7575  | 258 | 88.06 | 88.06 | Y |
| Virulence Factor | Pseudomonas_aeruginosa_GENE_fliI       | 7485  | 287 | 88.04 | 88.04 | Y |
| Virulence Factor | Pseudomonas_aeruginosa_GENE_algX       | 16161 | 291 | 87.39 | 87.39 | Y |
| Virulence Factor | Pseudomonas_aeruginosa_GENE_flgE       | 17009 | 360 | 87.17 | 87.17 | Y |
| Virulence Factor | Pseudomonas_aeruginosa_GENE_pilT       | 15490 | 242 | 86.43 | 86.43 | Y |
| Virulence Factor | Pseudomonas_aeruginosa_GENE_pilQ       | 28663 | 519 | 86.07 | 86.07 | Y |
| Virulence Factor | Pseudomonas_aeruginosa_GENE_fptA       | 7657  | 447 | 85.96 | 85.96 | Y |
| Virulence Factor | Pseudomonas_aeruginosa_GENE_pilS       | 12917 | 367 | 85.95 | 85.95 | Y |
| Virulence Factor | Pseudomonas_aeruginosa_GENE_lasA       | 3559  | 263 | 85.95 | 85.95 | Y |
| Virulence Factor | Pseudomonas_aeruginosa_GENE_ppkA       | 16738 | 436 | 85.83 | 85.83 | Y |
| Virulence Factor | Pseudomonas_aeruginosa_GeneID_PA0083   | 695   | 123 | 85.42 | 85.42 | Y |
| Virulence Factor | Pseudomonas_aeruginosa_GENE_pilA       | 637   | 126 | 84.56 | 84.56 | Y |
| Virulence Factor | Pseudomonas_aeruginosa_GENE_pchD       | 17058 | 318 | 84.35 | 84.35 | Y |
| Virulence Factor | Pseudomonas_aeruginosa_GENE_pvdE       | 1585  | 353 | 83.85 | 83.85 | Y |
| Virulence Factor | Pseudomonas_aeruginosa_GENE_algU       | 991   | 166 | 83.84 | 83.84 | Y |
| Virulence Factor | Pseudomonas_aeruginosa_GENE_waaG       | 14811 | 231 | 83.7  | 83.7  | Y |
| Virulence Factor | Pseudomonas_aeruginosa_GENE_fliE       | 5525  | 81  | 82.65 | 82.65 | Y |
| Virulence Factor | Pseudomonas_aeruginosa_GeneID_PAP1713  | 939   | 84  | 80.77 | 80.77 | Y |
| Virulence Factor | Pseudomonas_aeruginosa_GENE_exoT       | 8289  | 316 | 80.61 | 80.61 | Y |
| Virulence Factor | Pseudomonas_aeruginosa_GeneID_PA0080   | 1798  | 65  | 80.25 | 80.25 | Y |
| Virulence Factor | Pseudomonas_aeruginosa_GENE_pvdA       | 5651  | 227 | 79.37 | 79.37 | Y |
| Virulence Factor | Pseudomonas_aeruginosa_GeneID_PAP4746  | 583   | 182 | 79.13 | 79.13 | Y |
| Virulence Factor | Pseudomonas_aeruginosa_GENE_xcpW       | 7093  | 122 | 78.21 | 78.21 | Y |
| Virulence Factor | Pseudomonas_aeruginosa_GENE_rhIL       | 5766  | 132 | 78.11 | 78.11 | Y |
| Virulence Factor | Pseudomonas_aeruginosa_GENE_pilW       | 12861 | 181 | 77.02 | 77.02 | Y |
| Virulence Factor | Pseudomonas_aeruginosa_GENE_fpvA       | 1813  | 457 | 76.81 | 76.81 | Y |
| Virulence Factor | Pseudomonas_aeruginosa_GENE_PilZ       | 771   | 71  | 76.34 | 76.6  | Y |
| Virulence Factor | Pseudomonas_aeruginosa_GENE_rhIR       | 1233  | 153 | 76.12 | 76.12 | Y |
| Virulence Factor | Pseudomonas_aeruginosa_GENE_exoY       | 3136  | 273 | 75.62 | 75.62 | Y |
| Virulence Factor | Pseudomonas_aeruginosa_GENE_fimT       | 1269  | 102 | 75.56 | 75.56 | Y |
| Virulence Factor | Pseudomonas_aeruginosa_GENE_pilB       | 20094 | 410 | 69.97 | 69.97 | Y |
| Virulence Factor | Pseudomonas_aeruginosa_GENE_accC1      | 191   | 33  | 67.35 | 67.35 | Y |
| Virulence Factor | Pseudomonas_aeruginosa_GENE_qacEdelta1 | 2882  | 18  | 58.06 | 58.06 | Y |

Pseudomonas aeruginosa cont.

|                  |                                   |      |     |       |       |   |
|------------------|-----------------------------------|------|-----|-------|-------|---|
| Virulence Factor | Pseudomonas_aeruginosa_GENE_flgK  | 4953 | 282 | 52.22 | 52.22 | Y |
| Virulence Factor | Pseudomonas_aeruginosa_GENE_flgL  | 511  | 170 | 40.77 | 40.77 | Y |
| Virulence Factor | Pseudomonas_aeruginosa_GENE_pilC  | 6955 | 157 | 40.36 | 40.36 | Y |
| Virulence Factor | Pseudomonas_aeruginosa_GENE_wzy   | 726  | 227 | 40.32 | 40.32 | Y |
| Virulence Factor | Pseudomonas_aeruginosa_GENE_fliC  | 811  | 121 | 38.05 | 38.05 | N |
| Virulence Factor | Pseudomonas_aeruginosa_GENE_fliD  | 280  | 154 | 30.92 | 30.92 | N |
| Virulence Factor | Pseudomonas_aeruginosa_GENE_pilY1 | 1104 | 134 | 30.45 | 30.45 | N |
| Virulence Factor | Escherichia_coli_GENE_ompA        | 42   | 42  | 14.24 | 14.24 | N |
| Virulence Factor | Salmonella_Typhimurium_GENE_tetA  | 68   | 41  | 12.61 | 12.61 | N |
| Virulence Factor | Pseudomonas_aeruginosa_GENE_wzz   | 47   | 30  | 7.35  | 7.35  | N |

**Table S2. Microbiomes for comparison with PJI communities**

| <b>Sample Type</b>                 | <b>Accession Number</b> | <b>Study</b>                     |
|------------------------------------|-------------------------|----------------------------------|
| Skin (left retroauricular crease)  | SRS019015               | Metagenomics of human microbiome |
| Skin (left retroauricular crease)  | SRS024482               | Metagenomics of human microbiome |
| Skin (right retroauricular crease) | SRS019081               | Metagenomics of human microbiome |
| Skin (right retroauricular crease) | SRS045606               | Metagenomics of human microbiome |
| Skin (right retroauricular crease) | SRS046688               | Metagenomics of human microbiome |
| Skin (right retroauricular crease) | SRS052988               | Metagenomics of human microbiome |
| Skin (right retroauricular crease) | SRS058221               | Metagenomics of human microbiome |
| Saliva                             | SRS013942               | Metagenomics of human microbiome |
| Saliva                             | SRS014468               | Metagenomics of human microbiome |
| Saliva                             | SRS014692               | Metagenomics of human microbiome |
| Saliva                             | SRS015055               | Metagenomics of human microbiome |
| Saliva                             | SRS019120               | Metagenomics of human microbiome |
| Stool                              | SRS014459               | Metagenomics of human microbiome |
| Stool                              | SRS016056               | Metagenomics of human microbiome |
| Stool                              | SRS018656               | Metagenomics of human microbiome |
| Stool                              | SRS019582               | Metagenomics of human microbiome |
| Stool                              | SRS022137               | Metagenomics of human microbiome |
| Plaque (subgingival plaque)        | SRS013950               | Metagenomics of human microbiome |
| Plaque (subgingival plaque)        | SRS014107               | Metagenomics of human microbiome |
| Plaque (subgingival plaque)        | SRS014477               | Metagenomics of human microbiome |
| Plaque (subgingival plaque)        | SRS015064               | Metagenomics of human microbiome |
| Plaque (subgingival plaque)        | SRS019129               | Metagenomics of human microbiome |
| Plaque (supragingival plaque)      | SRS014894               | Metagenomics of human microbiome |
| Plaque (supragingival plaque)      | SRS015378               | Metagenomics of human microbiome |
| Plaque (supragingival plaque)      | SRS019333               | Metagenomics of human microbiome |
| Plaque (supragingival plaque)      | SRS022083               | Metagenomics of human microbiome |
| Throat                             | SRS013948               | Metagenomics of human microbiome |
| Throat                             | SRS014689               | Metagenomics of human microbiome |
| Throat                             | SRS019027               | Metagenomics of human microbiome |
| Throat                             | SRS019127               | Metagenomics of human microbiome |
| Tongue                             | SRS013818               | Metagenomics of human microbiome |
| Tongue                             | SRS015064               | Metagenomics of human microbiome |
| Tongue                             | SRS045127               | Metagenomics of human microbiome |
| Tongue                             | SRS052227               | Metagenomics of human microbiome |
| Vagina ( vagina interior forinx)   | SRS014465               | Metagenomics of human microbiome |
| Vagina ( vagina interior forinx)   | SRS015071               | Metagenomics of human microbiome |
| Vagina (mid vagina)                | SRS014466               | Metagenomics of human microbiome |
| Vagina (mid vagina)                | SRS015072               | Metagenomics of human microbiome |
